# Supplementary material for: Towards the stereochemical assignment of natural lydiamycin A
Source: Royal Society of Chemistry journal article supplement (doi:10.1039/b922544g), 2009-12-14

–Supporting information

## Towards the Stereochemical Assignment of Natural Lydiamycin A

Bo Chen,<sup>a</sup> Lu Dai,<sup>a</sup> Hui Zhang,<sup>a</sup> Wenfei Tan,<sup>a</sup> Zhengshuang Xu,<sup>\* a,b</sup> and Tao Ye<sup>\*a,b</sup>

<sup>a</sup> *Laboratory of Chemical Genomics, School of Chemical Biology and Biotechnology,  
Peking University Shenzhen Graduate School, Shenzhen 518055, China*

<sup>b</sup> *Department of Applied Biology and Chemical Technology,  
The Hong Kong Polytechnic University, Kowloon, Hong Kong, China*

### Content

|                                                                                   |           |
|-----------------------------------------------------------------------------------|-----------|
| <b>General Methods</b>                                                            | <b>1</b>  |
| Synthesis of <b>6</b>                                                             | <b>1</b>  |
| Synthesis of <b>3</b>                                                             | <b>3</b>  |
| Synthesis of <b>25S-8</b>                                                         | <b>3</b>  |
| Synthesis of <b>25R-8</b>                                                         | <b>4</b>  |
| Synthesis of <b>19S,25S-5</b>                                                     | <b>5</b>  |
| Synthesis of <b>19S,25R-5a</b>                                                    | <b>6</b>  |
| Synthesis of <b>19R,25S-5b</b>                                                    | <b>6</b>  |
| Synthesis of <b>19R,25R-5c</b>                                                    | <b>7</b>  |
| Synthesis of <b>2R,7S,10R,16S,19S,25S-14</b>                                      | <b>7</b>  |
| Synthesis of <b>2R,7S,10R,16S,19S,25S-15</b> from <b>2R,7S,10R,16S,19S,25S-14</b> | <b>8</b>  |
| Synthesis of <b>2R,7S,10R,16S,19S,25S-15</b> from <b>3</b> and <b>19S,25S-5</b>   | <b>9</b>  |
| Synthesis of <b>2R,7S,10R,16S,19S,25R-15a</b> from <b>3</b> and <b>19S,25R-5a</b> | <b>10</b> |
| Synthesis of <b>2R,7S,10R,16S,19R,25S-15b</b> from <b>3</b> and <b>19R,25S-5b</b> | <b>11</b> |
| Synthesis of <b>2R,7S,10R,16S,19R,25R-15c</b> from <b>3</b> and <b>19R,25R-5c</b> | <b>12</b> |
| Synthesis of <b>2R,7S,10R,16S,19S,25S-1</b>                                       | <b>13</b> |
| Synthesis of <b>2R,7S,10R,16S,19S,25R-1a</b>                                      | <b>13</b> |
| Synthesis of <b>2R,7S,10R,16S,19R,25S-1b</b>                                      | <b>14</b> |
| Synthesis of <b>2R,7S,10R,16S,19R,25R-1c</b>                                      | <b>14</b> |

## General Methods

Unless otherwise noted, reagents were commercially available and used without further purification. All solvents were distilled prior to use: THF was distilled from Na/benzophenone, dichloromethane, DMF, triethylamine, collidine, acetonitrile and diisopropylethylamine were distilled from CaH<sub>2</sub>. All non-aqueous reactions were performed under an atmosphere of nitrogen or argon using oven-dried glassware and standard syringe / septa techniques. <sup>1</sup>H and <sup>13</sup>C NMR spectra were measured in CDCl<sub>3</sub> or CD<sub>3</sub>OD on a Bruker Avance AV500 or DPX-300 at 500 MHz (125 MHz) or 300 MHz (75 MHz), respectively. Chemical shifts are reported in ppm and were referenced to either a tetramethylsilane internal standard or the signals due to the solvent residual. Data are reported as follows: chemical shift, multiplicity (s = singlet, d = doublet, t = triplet, q = quartet, m = multiplet, br = broad), integration, coupling constant in Hz. Mass spectra were measured on an ABI Q-star Elite. Optical rotations were measured on a Perkin-Elmer 351 polarimeter at 589nm with a 100 mm path length cell at 22°C (reported as follows: concentration (*c* in g/100mL), solvent). The reaction progress was checked on pre-coated TLC plates. TLC was carried out using pre-coated sheets (Qingdao silica gel 60-F250, 0.2mm) which, after development, were visualized under UV light at 254nm, and/or staining in p-anisole, ninhydrin or phosphomolybdic acid solution followed by heating. Flash column chromatography was performed using the indicated solvents (with R<sub>f</sub> = 2.0 – 3.0 for the desired component) on E. Qingdao silica gel 60 (230-400 mesh ASTM). HPLC was performed on Agilent 1200 system. Yields refer to chromatographically purified compounds, unless otherwise stated.

## Synthesis of **6**

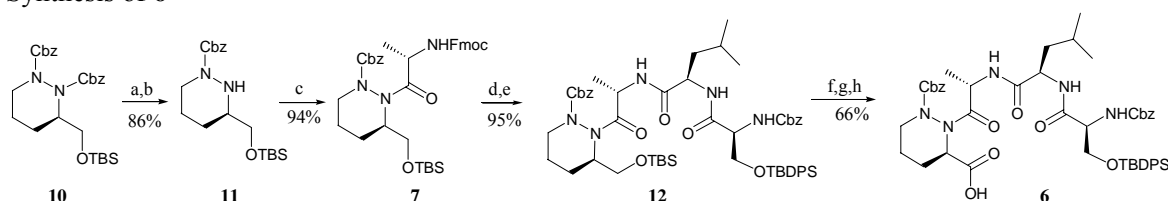

**Reagents and Conditions:** (a) H<sub>2</sub>, Pd/C; (b) Cbz-Cl, Et<sub>3</sub>N, MeOH; (c) Fmoc-L-Ala, (COCl)<sub>2</sub>, DMF (cat.), CH<sub>2</sub>Cl<sub>2</sub>, then **11**, AgCN, benzene; (d) Et<sub>3</sub>NH, MeCN; (e) L-Cbz-Ser(OTBDPS)-D-Leu-OH, EDCI, HOBT, DIPEA; f) PPTS, MeOH; (g) DMP, NaHCO<sub>3</sub>, CH<sub>2</sub>Cl<sub>2</sub>; (h). NaClO<sub>2</sub>, NaH<sub>2</sub>PO<sub>4</sub>, *t*-BuOH-H<sub>2</sub>O.

To a solution of **10** (1.52 g, 3.1 mmol) in methanol (20 mL) was added Pd/C (0.10 g, catalyst, 10% palladium on charcoal), the suspension was stirred under hydrogen atmosphere for 72 h. Pd/C was removed by filtration. The filtrate was cooled to -20 °C, triethyl amine (0.84 mL, 6.0 mmol) and benzyl chloroformate (0.68 mL, 3.4 mmol) were added. The reaction mixture was stirred at -20°C for 1 h before it was concentrated in *vacuo*. The residue was dissolved in ethyl acetate (150 mL), washed with saturated ammonium chloride (50 mL), brine (50 mL). The organic phase was dried over sodium sulfate (anhydrous), filtered and concentrated. The residue was purified by flash chromatography (ethyl acetate : hexanes = 1 : 9) to afford **11** (0.96 g, 86%). [ $\alpha$ ]<sub>D</sub><sup>22</sup> -3.3 (*c* 1.0, CHCl<sub>3</sub>); <sup>1</sup>H NMR (300 MHz, CDCl<sub>3</sub>):  $\delta$  0.05 (s, 6H), 0.89 (s, 9H), 1.32 (dq, 1H, *J* = 2.4 Hz, *J* = 7.5Hz), 1.54 (d, 1H, *J* = 7.5Hz), 1.61 (d, 1H, *J* = 7.8Hz), 1.68 (d, 1H, *J* = 8.4Hz), 2.88 (s, 1H), 3.01 (t, 1H, *J* = 7.2Hz), 3.47 (t, 1H, *J* = 5.4Hz), 3.60 (dd, 1H, *J* = 2.1Hz, *J* = 6.0Hz), 4.12 (d, 1H, *J* = 6.9Hz), 5.18 (s, 2H), 7.30-7.37 (m, 5H) ppm; <sup>13</sup>C NMR (75 MHz, CDCl<sub>3</sub>):  $\delta$  -5.6, -5.5, 18.2, 23.8, 25.8, 26.3, 44.9, 58.3, 65.3, 67.3, 127.9, 128.0, 128.4, 136.5, 154.9 ppm; HR-ESIMS for C<sub>19</sub>H<sub>33</sub>N<sub>2</sub>O<sub>3</sub>Si (M + H): *m/z*, calculated: 365.2260; found: 365.2275.

To a solution of Fmoc-L-Ala (0.10 g, 0.3 mmol) in dichloromethane (5 mL), oxalyl chloride (0.06 mL, 0.6 mmol) was slowly added at 0 °C, followed by DMF (0.01 mL, 0.1 mmol) via a syringe. The reaction mixture was stirred at 0 °C until gas evolution had ceased. Volatiles were removed in *vacuo*. The residue

was dissolved dichloromethane (5 mL) and concentrated in *vacuo*, these procedures were repeated twice to produce the acyl chloride. The acyl chloride was dissolved in benzene (5 mL) and dropwise added to the suspension of **11** (0.11 g, 0.3 mmol) and AgCN (0.09 g, 0.6 mmol) in benzene (5 mL) at 0 °C. The reaction mixture was allowed to warm to 80 °C and stirred for 40 minutes before it was poured into saturated sodium bicarbonate (50 mL) and extracted with ethyl acetate (50 mL X 3). The combined organic phases were washed with brine (30 mL), dried over sodium sulfate (anhydrous), filtered and concentrated *in vacuo*. Purification of the residue by flash chromatography (ethyl acetate : hexanes = 1 : 9) afforded **7** (0.19 g, 94%).  $[\alpha]_D^{22} +10.1$  (c 1.0, CHCl<sub>3</sub>); <sup>1</sup>H NMR (500 MHz, CDCl<sub>3</sub>) exists as rotational conformers: δ 0.00 (m, 6H), 0.86-0.91 (m, 9H), 1.27-1.35 (m, 3H), 1.52-1.55 (m, 1H), 1.71-2.10 (m, 3H), 3.00-3.19 (br m, 1H), 3.40-3.46 (m, 1H), 3.54-3.83 (m, 1H), 4.12-4.30 (m, 2H), 4.30-4.40 (m, 2H), 4.59-4.73 (br m, 2H), 4.90-5.25 (m, 2H), 5.61-5.90 (m, 1H), 7.23 (br s, 3H), 7.33 (t, 3H, *J* = 7.5Hz), 7.41 (t, 3H, *J* = 7.5Hz), 7.62 (d, 2H, *J* = 7.5Hz), 7.77 (d, 2H, *J* = 7.5Hz) ppm; <sup>13</sup>C NMR (125 MHz, CDCl<sub>3</sub>): δ -5.6, -5.5, 18.1, 18.5, 19.6, 22.6, 25.8, 46.6, 47.1, 47.3, 52.1, 60.1, 66.9, 68.9, 119.9(2C), 125.2, 127.1, 127.6, 128.2, 128.4, 128.6, 141.3, 144.0, 155.2, 156.0, 174.9 ppm. HR-ESIMS for C<sub>37</sub>H<sub>48</sub>N<sub>3</sub>O<sub>6</sub>Si (M + H): *m/z*, calculated: 658.3312; found: 658.3317.

To a solution of **7** (0.99 g, 1.5 mmol) in acetonitrile (10.0 mL) was added diethylamine (3.0 mL) at 0 °C. The reaction mixture was stirred at room temperature for 3 h before volatiles were removed in *vacuo*. The residue was dissolved in dichloromethane (5 mL) and concentrated, these procedures were repeated twice. The residue was then dried under high vacuum for 2 h. The above free amine intermediate was dissolved in dichloromethane (5 mL) and transferred to a solution of Cbz-*L*-Ser(OTBDPS)-*D*-Leu-OH (0.91 g 1.5 mmol) in dichloromethane (5 mL) *via* a cannula at 0 °C. After EDCI (1.15 g, 6.0 mmol), HOBT (0.31 g, 2.3 mmol) and triethylamine (1.0 mL, 6.0 mmol) were added, the reaction mixture was allowed to warm to room temperature and stirred for 20 h before it was poured into saturated sodium bicarbonate (50 mL) and extracted with ethyl acetate (50 mL X 3). The combined organic fractions were washed with brine (50 mL), dried over sodium sulfate (anhydrous), filtered and concentrated *in vacuo*. The residue was purified by flash chromatography (ethyl acetate : hexanes = 1 : 4) to afford **12** (1.50 g, 95%).  $[\alpha]_D^{22} +27.0$  (c 1.0, CHCl<sub>3</sub>); <sup>1</sup>H NMR (500 MHz, CDCl<sub>3</sub>) existed as rotational conformers: δ -0.07-0.09 (m, 6H), 0.84-0.92 (m, 15H), 1.06 (s, 9H), 1.28-1.32 (m, 3H), 1.48-1.57 (m, 2H), 1.57-1.70 (m, 4H), 1.85-2.07 (m, 1H), 2.96-3.10 (m, 1H), 3.36-3.75 (m, 2H), 3.83 (br s, 1H), 3.97-4.10 (m, 1H), 4.10-4.40 (m, 2H), 4.54 (br s, 2H), 4.68-4.95 (m, 1H), 4.95-5.31 (m, 4H), 5.62 (br s, 1H), 6.78-6.95 (m, 2H), 7.20-7.42 (m, 16H), 7.62-7.68 (m, 4H) ppm; <sup>13</sup>C NMR (125 MHz, CDCl<sub>3</sub>): δ -5.5, -5.4, 18.1, 18.5, 18.8, 19.2, 22.0, 22.5, 22.9, 24.8, 25.8, 26.9, 42.4, 45.8, 51.9, 52.1, 56.3, 60.1, 64.2, 67.0, 68.9, 127.8, 127.9, 128.0, 128.1, 128.2, 128.5(2C), 128.6, 129.9, 130.0, 135.5, 135.6, 156.0(2C), 169.4, 170.3, 173.5 ppm. HR-ESIMS for C<sub>55</sub>H<sub>78</sub>N<sub>5</sub>O<sub>9</sub>Si<sub>2</sub> (M + H): *m/z*, calculated: 1008.5338; found: 1008.5334.

To a solution of **12** (1.30 g, 1.3 mmol) in methanol (30 mL) was added PPTS (0.10 g, 0.4 mmol). The reaction mixture was refluxed for 3 h before it was concentrated in *vacuo*. The residue was dissolved in ethyl acetate (100 mL), washed with sodium bicarbonate (30 mL) and brine (30 mL). The organic phase was dried over sodium sulfate (anhydrous), filtered and concentrated. The residue was purified by flash chromatography (ethyl acetate : hexanes = 1 : 1) to produce the corresponding alcohol (0.95 g, 82%).  $[\alpha]_D^{22} +16.8$  (c 1.0, CHCl<sub>3</sub>); <sup>1</sup>H NMR (500 MHz, CDCl<sub>3</sub>) existed as rotational conformers: δ 0.88 (d, 3H, *J* = 6.5Hz), 0.91 (d, 3H, *J* = 6.0Hz), 1.06 (s, 9H), 1.22-1.34 (m, 3H), 1.50 (br s, 2H), 1.65-1.74 (m, 5H), 3.00-3.14 (m, 1H), 3.15-3.70 (m, 3H), 3.84 (br s, 1H), 4.00 (br s, 1H), 4.12-4.43 (m, 2H), 4.57 (br s, 1H), 4.65-4.95 (m, 2H), 5.05-5.13 (m, 3H), 5.22-5.34 (m, 1H), 5.62-5.78 (m, 1H), 6.77-7.12 (m, 2H), 7.27-7.45 (m, 16H), 7.44-7.65 (m, 4H) ppm; <sup>13</sup>C NMR (125 MHz, CDCl<sub>3</sub>): δ 18.5, 19.2, 19.6, 22.0, 22.9, 23.1, 24.8, 26.9, 42.0, 46.2, 51.8, 53.0, 56.7, 60.1, 64.2, 67.1, 69.6, 127.8(2C), 128.0(2C), 128.5, 128.8, 130.0, 132.6, 133.0, 135.5, 135.6, 136.3, 156.2, 158.0, 169.6, 170.5, 174.0 ppm. HR-ESIMS for C<sub>49</sub>H<sub>64</sub>N<sub>5</sub>O<sub>9</sub>Si (M + H): *m/z*, calculated: 894.4473; found: 894.4462.

To the above alcohol (0.88 g, 1.0 mmol) in dichloromethane (20 mL), NaHCO<sub>3</sub> (0.42 g, 2.0 mmol) and DMP (0.85 g, 2.0 mmol) were added. The reaction mixture was stirred at room temperature for 2 h, and

quenched with saturated sodium thiosulfate (5 mL). Layers were separated. The aqueous phase was extracted with dichloromethane (20 mL). The combined organic phases were concentrated in *vacuo* to give the crude aldehyde. This aldehyde was not further purified, but dissolved in THF-H<sub>2</sub>O-*t*-BuOH (20 mL, 2 : 2 : 1) and cooled to 0 °C. To the above solution, NaH<sub>2</sub>PO<sub>4</sub> (0.62 g, 4.0 mmol) and NaClO<sub>2</sub> (0.18 g, 2.0 mmol) were added sequentially. The reaction mixture was stirred at room temperature for 10 h before saturated sodium sulfite (5 mL) was added at 0 °C. The solution was stirred for another 1 h., and volatiles were removed under reduced pressure. The residue was extracted with ethyl acetate (50 mL x 3). The combined organic phases were washed with brine (100 mL), dried over sodium sulfate (anhydrous), filtered and concentrated to dryness to produce the corresponding carboxylic acid **6** (0.72g, 80%), which was used in the next reactions without further purification.

### Synthesis of **3**

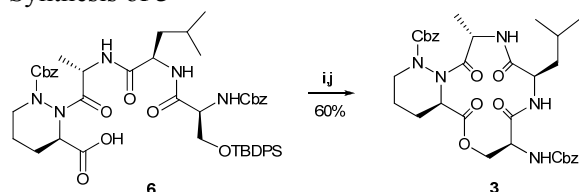

**Reagents and reaction conditions:** (i) TBAF, THF; (j) DEAD, Ph<sub>3</sub>P, THF

To a solution of acid **6** (0.90 g, 1.0 mmol) in THF (20 mL), TBAF (5 mL, 5.0 mmol, 1.0M in THF) was added. The reaction was stirred at room temperature for 3 h and quenched with citric acid (10 mL, 10% in water). Volatiles were removed in *vacuo*, the residue was extracted with ethyl acetate (50 mL x 3). The combined organic fractions were washed with brine (100 mL), dried over sodium sulfate (anhydrous), filtered and concentrated to give the precursor of macrocyclization. This linear precursor, which had been dried under high vacuum for 2 h, was dissolved in THF (50 mL), after PPh<sub>3</sub> (0.52 g, 2.0 mmol) dissolved in THF (50 mL) and DEAD (0.32 mL, 2.0 mmol) were added *via* a syringe. The reaction mixture was stirred at room temperature for 24 h before it was concentrated under reduced pressure. The residue, dissolved in ethyl acetate (200 mL), was successively washed with saturated ammonium chloride (30 mL), sodium bicarbonate (30 mL) and brine (30 mL), dried over sodium sulfate (anhydrous), filtered and concentrated in *vacuo*. Purification with flash chromatography (ethyl acetate : Hexane = 1 : 1) gave the desired macrocycle **3** (0.32 g, 60%). [ $\alpha$ ]<sub>D</sub><sup>22</sup> -12.7 (*c* 0.5, CHCl<sub>3</sub>); <sup>1</sup>H NMR (500 MHz, CDCl<sub>3</sub>) exists as rotational conformers:  $\delta$  0.90-0.96 (d, 6H, *J* = 7.5Hz), 1.20-1.30 (m, 3H), 1.42-1.43 (m, 1H), 1.55-1.65 (m, 3H), 1.74-1.76 (m, 1H), 1.83 (br s, 2H), 3.36-3.45 (m, 1H), 4.03-4.08 (m, 1H), 4.24 (d, 2H, *J* = 15.0Hz), 4.43 (q, 1H, *J* = 14.5Hz), 4.55 (d, 2H, *J* = 14.5Hz), 4.98-5.10 (m, 2H), 5.12-5.25 (m, 4H), 6.61 (d, 1H, *J* = 13.0Hz), 6.72 (d, 1H, *J* = 9.5Hz), 7.28-7.39 (m, 10H); <sup>13</sup>C NMR (125 MHz, CDCl<sub>3</sub>):  $\delta$  16.1, 17.8, 19.2, 21.0, 22.5, 23.0, 24.9, 37.9(37.7), 43.5, 48.2, 51.1, 54.3(55.2), 65.7, 67.5(67.8), 69.9(69.7), 128.2, 128.4, 128.5, 128.7, 128.9, 134.9, 135.6, 136.4, 156.3, 158.3, 169.5, 169.8, 170.4, 174.3 ppm. HR-ESIMS for C<sub>33</sub>H<sub>42</sub>N<sub>5</sub>O<sub>9</sub> (M+H): *m/z*, calculated: 652.2983; found: 652.2973.

### Synthesis of **25S-8**

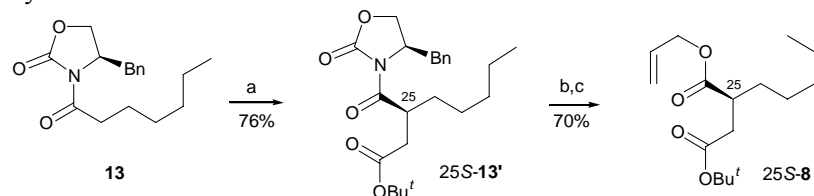

**Reagents and reaction conditions:** (a) LiHMDS, BrCH<sub>2</sub>CO<sub>2</sub>Bu<sup>t</sup>, THF, -78 °C; (b) LiOH, H<sub>2</sub>O<sub>2</sub>, THF-H<sub>2</sub>O; (c) allyl bromide, DIPEA, MeCN.

To a solution of **13** (4.13 g, 14.2 mmol) in THF (50 mL) was added LiHMDS (17 mL, 17.0 mmol, 1.0 M in THF) at -78 °C. 1 hour later, *tert*-butyl bromoacetate (4.0 mL, 27.0 mmol) was added *via* a syringe. The

reaction mixture was stirred at  $-78\text{ }^{\circ}\text{C}$  for 2 h, then warmed to  $0\text{ }^{\circ}\text{C}$  and quenched with  $\text{Et}_2\text{O}$  (100 mL) and aqueous ammonium chloride (50 mL). Layers were separated, and the aqueous phase was extracted with diethyl ether (50 mL x 2). The combined organic layers were washed with brine (100 mL), dried over sodium sulfate (anhydrous), filtered and concentrated in *vacuo*. Purification by flash chromatography (ethyl acetate : hexanes = 1 : 8) gave **25S-13'** (4.35 g, 76%).  $[\alpha]_{\text{D}}^{22} -30.4$  (*c* 1.0,  $\text{CHCl}_3$ );  $^1\text{H}$  NMR (500 MHz,  $\text{CDCl}_3$ ):  $\delta$  0.88 (t, 3H,  $J = 7\text{ Hz}$ ), 1.30-1.40 (m, 6H), 1.44 (m, 10H), 1.67-1.75 (m, 1H), 2.48 (dd, 1H,  $J = 4.5\text{ Hz}$ , 17.0 Hz), 2.72-2.83 (m, 2H), 3.35 (dd, 1H,  $J = 3.0\text{ Hz}$ , 13.5 Hz), 4.15-4.20 (m, 3H), 4.20-4.69 (m, 1H), 7.27-7.28 (m, 3H), 7.33-7.36 (m, 2H) ppm;  $^{13}\text{C}$  NMR (125 MHz,  $\text{CDCl}_3$ )  $\delta$  14.0, 22.5, 26.5, 28.1, 31.7, 31.9, 37.1, 37.5, 39.3, 55.6, 65.9, 80.7, 127.2, 128.9, 129.5, 135.8, 153.0, 171.5, 176.1 ppm. HR-ESIMS for  $\text{C}_{23}\text{H}_{33}\text{NO}_5\text{Na}$  ( $\text{M}+\text{Na}$ ):  $m/z$ , calculated: 426.2256; found: 426.2276.

To a solution of **25S-13'** (2.24 g, 5.6 mmol) in  $\text{H}_2\text{O}$ -THF (25 mL, 1 : 1.5) was added LiOH (0.47 g, 11.1 mmol) and  $\text{H}_2\text{O}_2$  (5 mL, 30% in water). The reaction mixture was stirred at room temperature for 18 h before it was quenched by addition of sodium sulfite at  $0\text{ }^{\circ}\text{C}$ . Volatiles were removed under reduced pressure, and the residue was extracted with diethyl ether (50 mL x 2). The organic phases were discarded, while the aqueous layer was acidified to pH 4.0 with citric acid (1.0 N aqueous solution) and then extracted with ethyl acetate (50 mL x 2). The combined organic fractions were washed with brine (50 mL), dried over sodium sulfate (anhydrous), filtered and concentrated to yield crude acid. The acid, without further purification, was dissolved in acetonitrile (20 mL). After allyl bromide (2.4 mL, 27.7 mmol) and diisopropylethylamine (4.6 mL, 27.7 mmol) were added, the reaction mixture was stirred at room temperature for 24 h. Volatiles were removed under reduced pressure, the residue was dissolved in ethyl acetate (100 mL) and washed with saturated sodium bicarbonate (50 mL), brine (50 mL). The organic phase was then dried over sodium sulfate (anhydrous), filtered and concentrated in *vacuo*. Purification by flash chromatography (ethyl acetate : hexanes = 1 : 15) afforded the allyl ester **25S-8** (1.1 g, 70%).  $[\alpha]_{\text{D}}^{22} -3.6$  (*c* 0.3,  $\text{CHCl}_3$ ).  $^1\text{H}$  NMR (500 MHz,  $\text{CDCl}_3$ ):  $\delta$  0.87 (t, 3H,  $J = 7.0\text{ Hz}$ ), 1.35-1.34 (m, 6H), 1.43 (s, 9H), 1.45-1.52 (m, 1H), 1.61-1.66 (m, 1H), 2.36 (dd, 1H,  $J = 5.0\text{ Hz}$ , 16.5 Hz), 2.62 (dd, 1H,  $J = 9.0\text{ Hz}$ , 16.5 Hz), 2.78-2.83 (m, 1H), 4.55-4.63 (m, 2H), 5.22, (dd, 1H,  $J = 1.5\text{ Hz}$ , 10.5 Hz), 5.32, (dd, 1H,  $J = 1.5\text{ Hz}$ , 17.0 Hz), 5.87-5.95 (m, 1H) ppm;  $^{13}\text{C}$  NMR (125 MHz,  $\text{CDCl}_3$ ):  $\delta$  13.9, 22.4, 26.6, 28.0, 31.6, 31.9, 37.4, 41.5, 65.1, 80.6, 118.1, 132.3, 171.1, 174.7 ppm; HR-ESIMS for  $\text{C}_{16}\text{H}_{28}\text{O}_4\text{Na}$  ( $\text{M}+\text{Na}$ ):  $m/z$ , calculated: 307.1885; found: 307.1893.

### Synthesis of **25R-8**

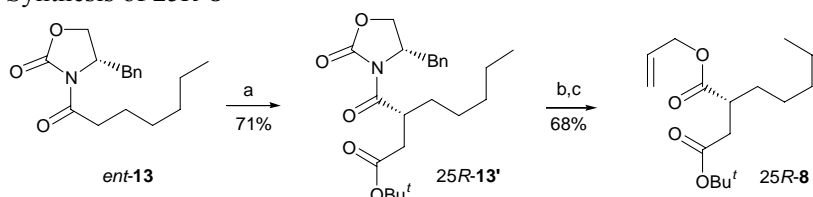

**Reagents and reaction conditions:** (a) LiHMDS,  $\text{BrCH}_2\text{CO}_2\text{Bu}^t$ , THF,  $-78\text{ }^{\circ}\text{C}$ ; (b) LiOH,  $\text{H}_2\text{O}_2$ , THF- $\text{H}_2\text{O}$ ; (c) allyl bromide, DIPEA, MeCN.

To a solution of **ent-13** (4.21 g, 15.0 mmol) in THF (50 mL) was added LiHMDS (17.3 mL, 17.3 mmol, 1.0 M in THF) at  $-78\text{ }^{\circ}\text{C}$ . 1 hour later, *tert*-butyl bromoacetate (4.1 mL, 27.5 mmol) was added *via* a syringe. The reaction mixture was stirred at  $-78\text{ }^{\circ}\text{C}$  for 2 h, then warmed to  $0\text{ }^{\circ}\text{C}$  and quenched with  $\text{Et}_2\text{O}$  (100 mL) and aqueous ammonium chloride (50 mL). Layers were separated, and the aqueous phase was extracted with diethyl ether (50 mL x 2). The combined organic layers were washed with brine (100 mL), dried over sodium sulfate (anhydrous), filtered and concentrated in *vacuo*. Purification by flash chromatography (ethyl acetate : hexanes = 1 : 8) gave **25R-13'** (4.3 g, 71%).

To a solution of **25R-13'** (2.51 g, 5.0 mmol) in  $\text{H}_2\text{O}$ -THF (25 mL, 1 : 1.5) was added LiOH (0.53 g, 12.4 mmol) and  $\text{H}_2\text{O}_2$  (5 mL, 30% in water). The reaction mixture was stirred at room temperature for 18 h before it was quenched by addition of sodium sulfite at  $0\text{ }^{\circ}\text{C}$ . Volatiles were removed under reduced

pressure, and the residue was extracted with diethyl ether (50 mL x 2). The organic phases were discarded, while the aqueous layer was acidified to pH 4.0 with citric acid (1.0 N aqueous solution) and extracted with ethyl acetate (50 mL x 2). The combined organic fractions were washed with brine (50 mL), dried over sodium sulfate (anhydrous), filtered and concentrated to yield crude acid. The acid, without further purification, was dissolved in acetonitrile (20 mL). After allyl bromide (3.0 mL, 31.0 mmol) and diisopropylethylamine (5.2 mL, 31.0 mmol) were added, the reaction mixture was stirred at room temperature for 24 h. Volatiles were removed under reduced pressure, the residue was dissolved in ethyl acetate (100 mL) and washed with saturated sodium bicarbonate (50 mL), brine (50 mL). The organic phase was then dried over sodium sulfate (anhydrous), filtered and concentrated in *vacuo*. Purification by flash chromatography (ethyl acetate : hexanes = 1 : 15) afforded the allyl ester 25*R*-**8** (1.2 g, 68%). The analytical data was identical to its enantiomer 25*S*-**8**.

#### Synthesis of 19*S*,25*S*-**5**

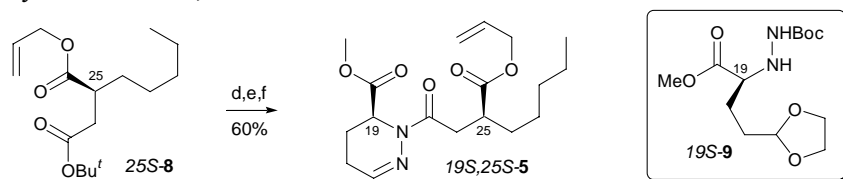

**Reagents and reaction conditions:** (d) TFA, CH<sub>2</sub>Cl<sub>2</sub>; (e) (COCl)<sub>2</sub>, DMF, CH<sub>2</sub>Cl<sub>2</sub>, then 19*S*-**9**, collidine; (f) TFA-H<sub>2</sub>O

To a solution of 25*S*-**8** (0.30 g, 1.0 mmol) in dichloromethane (5 mL) was added TFA (1.0 mL) at 0 °C. The reaction mixture was stirred for 3 h before it was concentrated in *vacuo* to produce the carboxylic acid. This acid, without further purification, was dissolved in dichloromethane (5 mL) at 0 °C. After oxalyl chloride (0.17 mL, 2.0 mmol), followed by DMF (0.01 mL, 0.1 mmol), were added, the reaction mixture was allowed to warm to room temperature within 1 hour and stirred at room temperature for further 2 h. Volatiles were removed in *vacuo* to afford acyl chloride. After the acyl chloride was dried under high vacuum for 2 h, it was dissolved in dichloromethane (5 mL) and transferred to a solution of 19*S*-**9** (0.16 g, 0.5 mmol) and collidine (0.17 mL, 1.3 mmol) in dichloromethane (10 mL). The reaction mixture was stirred under an argon atmosphere for 20 min then poured into saturated sodium bicarbonate (20 mL). Layers were separated, and the aqueous phase was extracted with dichloromethane (20 mL x 2). The combined organic fractions were washed with brine (20 mL), dried over sodium sulfate (anhydrous), filtered and concentrated in *vacuo*. This intermediate, without further purification, was treated with TFA (10 mL, 90% in water) for 30 min at room temperature. The reaction mixture was then concentrated in *vacuo* and partitioned between dichloromethane (50 mL) and citric acid (20 mL, 10% solution in water). Layers were separated and the organic phase was washed with water (20 mL), saturated sodium bicarbonate (20 mL) and brine (20 mL), dried over sodium sulfate (anhydrous), filtered and concentrated in *vacuo*. The residue, after purification by flash chromatography (ethyl acetate : hexanes = 1 : 2), afforded 19*S*,25*S*-**5** (0.10 g, 60%). HR-ESIMS for C<sub>18</sub>H<sub>28</sub>N<sub>2</sub>O<sub>5</sub>Na (M+Na): *m/z*, calculated: 375.1896; found: 375.1801. Analytical data for 19*S*,25*S*-**5**: [ $\alpha$ ]<sub>D</sub><sup>22</sup> +15.7 (*c* 1.0, CHCl<sub>3</sub>). <sup>1</sup>H NMR (500 MHz, CDCl<sub>3</sub>):  $\delta$  0.87 (t, 3H, 7.0Hz), 1.26-1.36 (m, 6H), 1.56-1.59 (m, 1H), 1.65-1.68 (m, 1H), 1.87-1.90 (m, 1H), 2.07-2.12 (m, 1H), 2.18-2.22 (m, 1H), 2.33-2.37 (m, 1H), 2.90 (dd, 1H, *J* = 4.5Hz, 17.0Hz), 2.95-2.98 (m, 1H), 3.16 (dd, 1H, *J* = 7.0Hz, 10.0Hz), 3.72 (s, 3H), 4.58-4.63 (m, 2H), 5.19-5.22 (m, 2H), 5.32 (dd, 1H, *J* = 1.5Hz, *J* = 17.5Hz), 5.90-5.96 (m, 1H), 6.89 (d, 1H, *J* = 4.5Hz) ppm. <sup>13</sup>C NMR (125 MHz, CDCl<sub>3</sub>)  $\delta$  14.0, 18.8, 20.5, 22.4, 26.7, 31.7, 32.2, 35.0, 41.0, 50.9, 52.6, 65.0, 117.8, 132.6, 141.3, 170.5, 173.0, 175.6 ppm.

### Synthesis of 19*S*,25*R*-5a

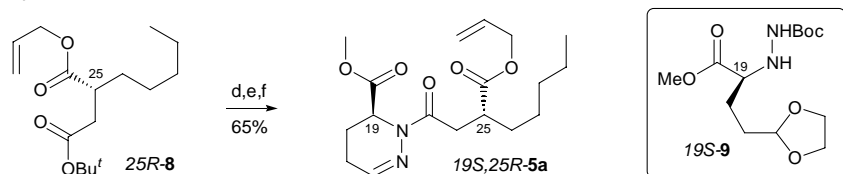

**Reagents and reaction conditions:** (d) TFA, CH<sub>2</sub>Cl<sub>2</sub>; (e) (COCl)<sub>2</sub>, DMF, CH<sub>2</sub>Cl<sub>2</sub>, then 19*S*-9, collidine; (f) TFA-H<sub>2</sub>O

To a solution of 25*R*-8 (0.21 g, 0.7 mmol) in dichloromethane (5 mL) was added TFA (0.7 mL) at 0 °C. The reaction mixture was stirred for 3 hour before it was concentrated in *vacuo* to produce the carboxylic acid. This acid, without further purification, was dissolved in dichloromethane (5 mL) at 0 °C. After oxalyl chloride (0.12 mL, 1.4 mmol), followed by DMF (0.002 mL, 0.07 mmol), were added, the reaction mixture was allowed to warm to room temperature within 1 hour and stirred at room temperature for further 2 h. Volatiles were removed in *vacuo* to afford acyl chloride. After the acyl chloride was dried under high vacuum for 2 h, it was dissolved in dichloromethane (5 mL) and transferred to a solution of 19*S*-9 (0.11 g, 0.35 mmol) and collidine (0.12 mL, 0.9 mmol) in dichloromethane (10 mL). The reaction mixture was stirred under an argon atmosphere for 20 min and then poured into saturated sodium bicarbonate (20 mL). Layers were separated, and the aqueous phase was extracted with dichloromethane (20 mL x 2). The combined organic fractions were washed with brine (20 mL), dried over sodium sulfate (anhydrous), filtered and concentrated in *vacuo*. This intermediate, without further purification, was treated with TFA (7 mL, 90% in water) for 30 min at room temperature. The reaction mixture was then concentrated in *vacuo* and partitioned between dichloromethane (50 mL) and citric acid (20 mL, 10% solution in water). Layers were separated and the organic phase was washed with water (20 mL), saturated sodium bicarbonate (20 mL) and brine (20 mL), dried over sodium sulfate (anhydrous), filtered and concentrated in *vacuo*. The residue, after purification by flash chromatography (ethyl acetate : hexanes = 1 : 2), afforded 19*S*,25*R*-5a (0.11 g, 65%). Analytical data for 19*S*,25*R*-5a:  $[\alpha]_D^{22}$  -12.6 (*c* 1.0, CHCl<sub>3</sub>) <sup>1</sup>H NMR (500 MHz, CDCl<sub>3</sub>): δ 0.87 (t, 3H, *J* = 4.0Hz), 1.28-1.31 (m, 6H), 1.57-1.60 (m, 1H), 1.67-1.69 (m, 1H), 1.88-1.90 (m, 1H), 2.05-2.09 (m, 1H), 2.17-2.23 (m, 1H), 2.22-2.28 (m, 1H), 2.87-2.91 (m, 1H), 2.93-2.96 (m, 1H), 3.17 (q, 1H, *J* = 8.0Hz), 3.72 (s, 3H), 4.59-4.62 (m, 2H), 5.19-5.24 (m, 2H), 5.31-5.35 (dd, 1H, *J* = 1.5Hz, 17.5Hz), 5.90-5.96 (m, 1H), 6.89 (d, 1H, *J* = 4.0Hz) ppm; <sup>13</sup>C NMR (125 MHz, CDCl<sub>3</sub>) δ 13.9, 18.8, 20.5, 22.4, 26.7, 31.7, 32.0, 35.1, 41.2, 50.9, 52.5, 65.0, 117.7, 132.6, 141.4, 170.4, 172.9, 175.1 ppm.

### Synthesis of 19*R*,25*S*-5b

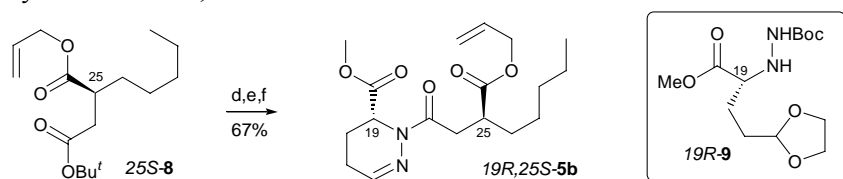

**Reagents and reaction conditions:** (d) TFA, CH<sub>2</sub>Cl<sub>2</sub>; (e) (COCl)<sub>2</sub>, DMF, CH<sub>2</sub>Cl<sub>2</sub>, then 19*R*-9, collidine; (f) TFA-H<sub>2</sub>O

To a solution of 25*S*-8 (0.24 g, 0.8 mmol) in dichloromethane (5 mL) was added TFA (0.8 mL) at 0 °C. The reaction mixture was stirred for 3 h before it was concentrated in *vacuo* to produce the carboxylic acid. This acid, without further purification, was dissolved in dichloromethane (5 mL) at 0 °C. After oxalyl chloride (0.14 mL, 1.6 mmol), followed by DMF (0.01 mL, 0.1 mmol), were added, the reaction mixture was allowed to warm to room temperature within 1 hour and stirred at room temperature for 2 hour. Volatiles were removed in *vacuo* to afford acyl chloride. After the acyl chloride was dried under high vacuum for 2 hour, it was dissolved in dichloromethane (5 mL) and transferred to a solution of 19*R*-9 (0.13 g, 0.4 mmol) and collidine (0.14 mL, 1.0 mmol) in dichloromethane (10 mL). The reaction

mixture was stirred under an argon atmosphere for 20 min and then poured into saturated sodium bicarbonate (20 mL). Layers were separated, and the aqueous phase was extracted with dichloromethane (20 mL x 2). The combined organic fractions were washed with brine (20 mL), dried over sodium sulfate (anhydrous), filtered and concentrated in *vacuo*. This intermediate, without further purification, was treated with TFA (8 mL, 90% in water) for 30 min at room temperature. The reaction mixture was then concentrated in *vacuo* and partitioned between dichloromethane (50 mL) and citric acid (20 mL, 10% solution in water). Layers were separated and the organic phase was washed with water (20 mL), saturated sodium bicarbonate (20 mL) and brine (20 mL), dried over sodium sulfate (anhydrous), filtered and concentrated in *vacuo*. The residue, after purification by flash chromatography (ethyl acetate : hexanes = 1 : 2), afforded 19*R*,25*S*-**5b** (0.09 g, 67%). Its analytical data was identical to 19*S*,25*R*-**5a**.

#### Synthesis of 19*R*,25*R*-**5c**

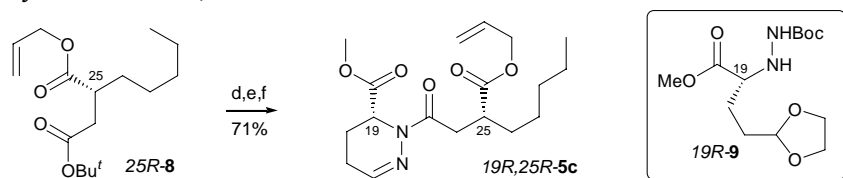

**Reagents and reaction conditions:** (d) TFA, CH<sub>2</sub>Cl<sub>2</sub>; (e) (COCl)<sub>2</sub>, DMF, CH<sub>2</sub>Cl<sub>2</sub>, then 19*R*-**9**, collidine; (f) TFA-H<sub>2</sub>O

To a solution of 25*R*-**8** (0.27 g, 0.9 mmol) in dichloromethane (5 mL) was added TFA (0.9 mL) at 0 °C. The reaction mixture was stirred for 3 h before it was concentrated in *vacuo* to produce the carboxylic acid. This acid, without further purification, was dissolved in dichloromethane (5 mL) at 0 °C. After oxalyl chloride (0.15 mL, 1.8 mmol), followed by DMF (0.01 mL, 0.1 mmol), was added, the reaction mixture was allowed to warm to room temperature within 1 hour and stirred at room temperature for 2 hours. Volatiles were removed in *vacuo* to afford acyl chloride. After the acyl chloride was dried under high vacuum for 2 hours, it was dissolved in dichloromethane (5 mL) and transferred to a solution of 19*R*-**9** (0.14 g, 0.45 mmol) and collidine (0.15 mL, 1.2 mmol) in dichloromethane (10 mL). The reaction mixture was stirred under an argon atmosphere for 20 min and then poured into saturated sodium bicarbonate (20 mL). Layers were separated, and the aqueous phase was extracted with dichloromethane (20 mL x 2). The combined organic fractions were washed with brine (20 mL), dried over sodium sulfate (anhydrous), filtered and concentrated in *vacuo*. The intermediate, without further purification, was treated with TFA (9 mL, 90% in water) for 30 min at room temperature. The reaction mixture was then concentrated in *vacuo* and partitioned between dichloromethane (50 mL) and citric acid (20 mL, 10% solution in water). Layers were separated and the organic phase was washed with water (20 mL), saturated sodium bicarbonate (20 mL) and brine (20 mL), dried over sodium sulfate (anhydrous), filtered and concentrated in *vacuo*. The residue, after purification by flash chromatography (ethyl acetate : hexanes = 1 : 2), afforded 19*R*,25*R*-**5c** (0.11 g, 71%). Its analytical data was identical to 19*S*,25*S*-**5**.

#### Synthesis of 2*R*,7*S*,10*R*,16*S*,19*S*,25*S*-**14**

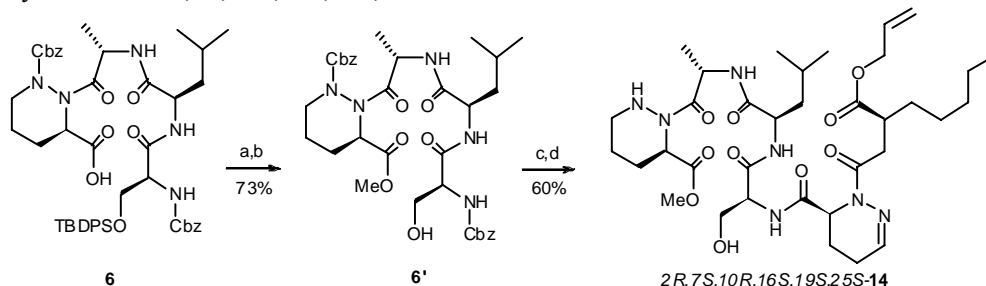

**Reagents and reaction conditions:** (a) CH<sub>2</sub>N<sub>2</sub>, Ether; (b) TBAF, THF; (c) H<sub>2</sub>, Pd/C, MeOH; (d) 19*S*,25*S*-**16**, HATU, HOAt, DIPEA, DMF;

To **2R,7S,10R,16S-6** (0.54 g, 0.6 mmol) in THF (30 mL) was added freshly prepared  $\text{CH}_2\text{N}_2$  (10.0 mmol) in ether at 0 °C. The solution was stirred for 3h before glacial acetic acid (5 mL) was added. The reaction mixture was stirred for further 1h, was then poured into saturated sodium bicarbonate (50 mL) and extracted with ethyl acetate (30 mL x 3). The combined organic layers were washed with brine (30 mL), dried over sodium sulfate (anhydrous), filtered and concentrated in *vacuo*. The residue was purified by flash chromatography (ethyl acetate : hexanes = 1 : 1) to give the corresponding ester. The resulting methyl ester was dissolved in dry THF (40 mL), TBAF (3.0 mL, 3.0 mmol, 1M in THF,) was added at 0 °C. The reaction solution was stirred at room temperature for 3 h. Volatiles were removed under reduced pressure, the residue was dissolved in ethyl acetate (150 mL) and washed with citric acid (30 mL, 15 % solution in water), saturated ammonium chloride (30 mL) and brine (30 mL). The organic phase was dried over sodium sulfate (anhydrous), filtered and concentrated in *vacuo*. The residue was purified by flash chromatography (ethyl acetate : hexanes = 3 : 1) to afford **2R,7S,10R,16S-6'** (0.30g, 73%). Analytical data:  $^1\text{H}$  NMR (500 MHz,  $\text{CDCl}_3$ ) exists as rotational conformers:  $\delta$  0.90 (br s, 6H), 1.21-1.29 (m, 3H), 1.39-1.47 (m, 1H), 1.52-1.64 (m, 2H), 1.71-1.78 (m, 2H), 2.04-2.14 (m, 2H), 2.99-3.04 (m, 1H), 3.32-3.44 (m, 2H), 3.59-3.70 (m, 3H), 4.20-4.27 (m, 3H), 4.43-4.50 (m, 1H), 4.77-4.92 (m, 1H), 5.11-5.23 (m, 5H), 5.96-6.07 (m, 1H), 6.65 (br s, 1H), 7.19 (br s, 1H), 7.31-7.35 (br m, 10H) ppm.  $^{13}\text{C}$  NMR (75 MHz,  $\text{CDCl}_3$ ):  $\delta$  13.6, 14.5, 18.6, 21.6, 23.7, 24.4, 24.8, 39.5, 45.7(45.5), 50.7, 51.4, 52.3, 57.0, 62.8, 67.3, 69.1, 128.0, 128.1, 128.2, 128.5(2C), 128.6, 135.2, 136.0, 155.7, 156.2, 169.7, 170.6, 171.5(172.1), 174.4(175.7) ppm.

**2R,7S,10R,16S-6'** (0.07 g, 0.1 mmol) was dissolved in methanol (10 mL), after a catalytic amount of Pd/C (10%) was added, the reaction mixture was exposed to hydrogen atmosphere. The reaction was monitored by thin layer chromatography until all the starting material was consumed (ca 3 h). Then it was filtered through a pad of Celite to remove the catalyst. The filtrate was concentrated in *vacuo* to afford the corresponding free amine. The amine, freshly prepared acid **19S,25S-16** (0.04 g, 0.1 mmol) and HOAt (0.03 g, 0.22 mmol) were dissolved in DMF (5 mL) at 0 °C. To the above solution, HATU (0.09 g, 0.22 mmol) and diisopropylethylamine (0.1 mL, 0.55 mmol) were added. The reaction solution was stirred at room temperature for 20 h, then poured into saturated sodium bicarbonate (50 mL) and extracted with ethyl acetate (50mL x 3). The combined organic layers were washed with brine (50 mL), dried over sodium sulfate (anhydrous), filtered and concentrated in *vacuo*. The residue was purified by flash chromatography (ethyl acetate) to afford **2R,7S,10R,16S,19S,25S-14** (0.04 g, 60%).  $[\alpha]_D^{22} +16.0$  (c 0.3  $\text{CHCl}_3$ );  $^1\text{H}$  NMR (500 MHz,  $\text{CDCl}_3$ ):  $\delta$  0.88 (t, 3H,  $J = 7.0\text{Hz}$ ), 0.91 (d, 3H,  $J = 5.5\text{Hz}$ ), 0.94 (d, 3H,  $J = 6.0\text{Hz}$ ), 1.26-1.36 (m, 9H), 1.44-1.49 (m, 1H), 1.58-1.67 (m, 6H), 1.76-1.84 (m, 1H), 1.86-1.89 (m, 1H), 2.21-2.26 (m, 3H), 2.41 (d, 1H,  $J = 15.0\text{Hz}$ ), 2.75 (q, 1H,  $J = 13.0\text{Hz}$ ), 2.93-3.00 (m, 2H), 3.07-3.13 (m, 2H), 3.62 (d, 1H,  $J = 8.5\text{Hz}$ ), 3.75 (s, 3H), 3.89 (br s, 1H), 4.15 (d, 1H,  $J = 12.0\text{Hz}$ ), 4.29 (d, 1H,  $J = 11.5\text{Hz}$ ), 4.38-4.43 (m, 2H), 4.52-4.64 (m, 2H), 5.02 (d, 1H,  $J = 4.5\text{Hz}$ ), 5.15 (d, 1H,  $J = 4.5\text{Hz}$ ), 5.20-5.34 (m, 3H), 5.88-5.94 (m, 1H), 6.79 (d, 1H,  $J = 8.0\text{Hz}$ ), 6.96-7.00 (m, 2H), 7.08 (d, 1H,  $J = 7.0\text{Hz}$ ) ppm;  $^{13}\text{C}$  NMR (125 MHz,  $\text{CDCl}_3$ ):  $\delta$  14.0, 18.1, 18.5, 20.4, 21.6, 21.8, 22.5, 23.0, 24.8, 25.7, 26.6, 31.6, 32.1, 35.2, 39.4, 41.0, 46.1, 47.0, 51.2, 51.9, 52.6, 52.8, 55.8, 62.4, 65.2, 117.9, 132.3, 143.8, 170.1, 171.2, 171.3(2C), 174.5, 174.9, 175.7 ppm. HR-ESIMS for  $\text{C}_{35}\text{H}_{58}\text{N}_7\text{O}_{10}$  ( $\text{M}+\text{H}$ ):  $m/z$ , calculated: 736.4245; found: 736.4258.

#### Synthesis of **2R,7S,10R,16S,19S,25S-15** from **2R,7S,10R,16S,19S,25S-14**

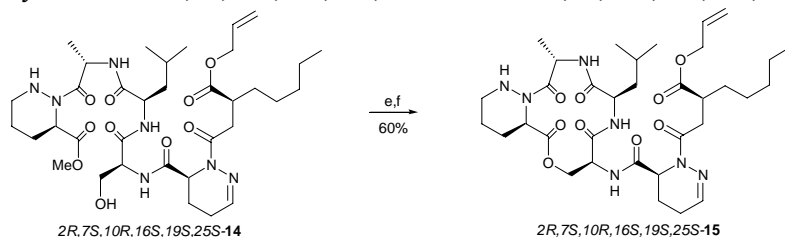

**Reagents and reaction conditions:** (e) LiOH, THF-MeOH- $\text{H}_2\text{O}$ ; (f) DEAD,  $\text{PPh}_3$ , THF;

**2R,7S,10R,16S,19S,25S-14** (0.04 g, 0.05 mmol) was dissolved in THF-H<sub>2</sub>O (4 mL, 1 : 1). LiOH (0.004 g, 0.1 mmol) was added in one portion. The reaction mixture was stirred at room temperature for 1 hour before it was concentrated in *vacuo*. The aqueous residue was acidified with 1 N HCl to pH 3. Layers were separated, and the aqueous layer was extracted with ethyl acetate (20 mL x 2). The combined organic phases were washed with brine (20 mL), dried over sodium sulfate (anhydrous), filtered and concentrated in *vacuo* to give the corresponding acid. The crude acid, without further purification, was dissolved in THF (5 mL) and chilled in an ice-water bath. After DEAD (15  $\mu$ L 0.1 mmol) and PPh<sub>3</sub> (0.03 g, 0.1 mmol) were added, the solution was stirred at room temperature for 24 h. Volatiles were removed in *vacuo*, the residue was purified by flash chromatography (ethyl acetate : hexanes = 2 : 1) to afford **2R,7S,10R,16S,19S,25S-15** (0.02 g, 60%). [ $\alpha$ ]<sub>D</sub><sup>22</sup> +2.0 (c 0.2, CHCl<sub>3</sub>); <sup>1</sup>H NMR (500 MHz, CDCl<sub>3</sub>):  $\delta$  0.88-0.90 (m, 6H), 0.93 (d, 3H, *J* = 6.5Hz), 1.27 (d, 3H, *J* = 7.5Hz), 1.31-1.38 (m, 6H), 1.49-1.52 (m, 2H), 1.62-1.65 (m, 2H), 1.74-1.87 (m, 5H), 2.24-2.28 (m, 3H), 2.51-2.58 (m, 2H), 2.73-2.78 (m, 1H), 2.97-3.03 (m, 2H), 3.39 (dd, 1H, *J* = 11.5Hz, 15.5Hz), 3.94 (d, 1H, *J* = 11.0Hz), 4.33-4.37 (m, 1H), 4.50-4.52 (m, 2H), 4.60-4.62 (m, 2H), 4.74 (q, 1H, *J* = 4.0Hz), 5.18 (d, 1H, *J* = 4.0Hz), 5.24-5.27 (m, 2H), 5.38 (dd, 1H, *J* = 1.5Hz, 17.0Hz), 5.50 (dd, 1H, *J* = 6.5Hz, 9.5Hz), 5.89-5.96 (m, 1H), 6.54 (d, 1H, *J* = 9.5Hz), 6.76 (d, 1H, *J* = 8.0Hz), 7.03 (s, 1H), 7.38 (d, 1H, *J* = 8.0Hz) ppm; <sup>13</sup>C NMR (125 MHz, CDCl<sub>3</sub>):  $\delta$  13.9, 16.8, 17.8, 20.6, 21.8, 21.9, 22.4, 23.0, 24.7, 24.8, 26.7, 31.6, 31.7, 34.6, 37.1, 42.1, 43.6, 47.0, 51.7(3C), 52.9, 65.7, 65.9, 118.1, 132.0, 144.9, 169.0, 170.3, 170.4, 170.6, 173.5, 174.6, 176.0 ppm. HR-ESIMS *m/z* calcd for C<sub>34</sub>H<sub>54</sub>N<sub>7</sub>O<sub>9</sub> (M+H), 704.3983; Found 704.3971.

#### Synthesis of **2R,7S,10R,16S,19S,25S-15** from **3** and **19S,25S-5**

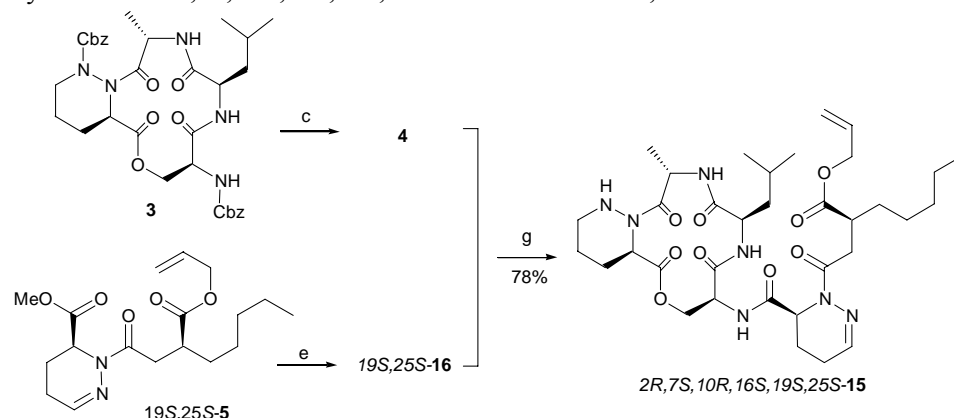

**Reagents and reaction conditions:** (c) H<sub>2</sub>, Pd/C, MeOH; (e) LiOH, THF-MeOH-H<sub>2</sub>O; (g) HATU, HOAt, DIPEA, DMF;

Compound **3** (0.13 g, 0.2 mmol) was dissolved in methanol (20 mL). After a catalytic amount of Pd/C (10%) was added, the reaction mixture was exposed to hydrogen atmosphere. The reaction was monitored by thin layer chromatography until all the starting material was consumed (ca 3 h). It was then filtered through a pad of Celite to remove the catalyst. The filtrate was concentrated in *vacuo* to afford the free amine **4**. While **19S,25S-5** (0.08 g, 0.22 mmol) was dissolved in THF-H<sub>2</sub>O (ca 5 mL, 1 : 1) at 0 °C and lithium hydroxide (0.02 g, 0.44 mmol) was added to the solution. The reaction mixture was stirred at room temperature and monitored by thin layer chromatography until starting ester was consumed (ca. 3 h). Volatiles were removed under reduced pressure and the residue was diluted with brine (5 mL) and extracted with diethyl ether (20 mL x 2). The organic phase was discarded; and the aqueous phase was acidified to pH 3 with citric acid (30mL, 15% solution in water) and extracted with ethyl acetate (30 mL x 3). The combined organic layers were washed with brine (30 mL), dried over sodium sulfate (anhydrous), filtered and concentrated in *vacuo* to give the corresponding acid **19S,25S-16**. Acid **19S,25S-16** and free amine **4** were dissolved in DMF (30 mL) and chilled with an ice - water bath. HOAt (0.25 g, 0.66 mmol), followed by HATU (0.09 g, 0.66 mmol), were added, and diisopropylethylamine (0.58 mL, 3.3 mmol)

was added 10 min later. The reaction mixture was then stirred at room temperature for 24 h, before it was concentrated in *vacuo*. The residue was dissolved in ethyl acetate – benzene (200 mL, 3 : 1) and washed with water (50 mL), saturated sodium bicarbonate (50 mL) and brine (50 mL). The organic phase was dried over sodium sulfate (anhydrous), filtered and concentrated in *vacuo*. The residue was purified by flash chromatography (ethyl acetate : hexanes = 2 : 1) to produce **2R,7S,10R,16S,19S,25S-15** (0.12 g, 78%). HR-ESIMS *m/z* calcd for C<sub>34</sub>H<sub>54</sub>N<sub>7</sub>O<sub>9</sub> (M+H), 704.3983; Found 704.3970. Analytical data was identical to the product obtained from linear precursor **14**.

#### Synthesis of **2R,7S,10R,16S,19S,25R-15a** from **3** and **19S,25R-5a**

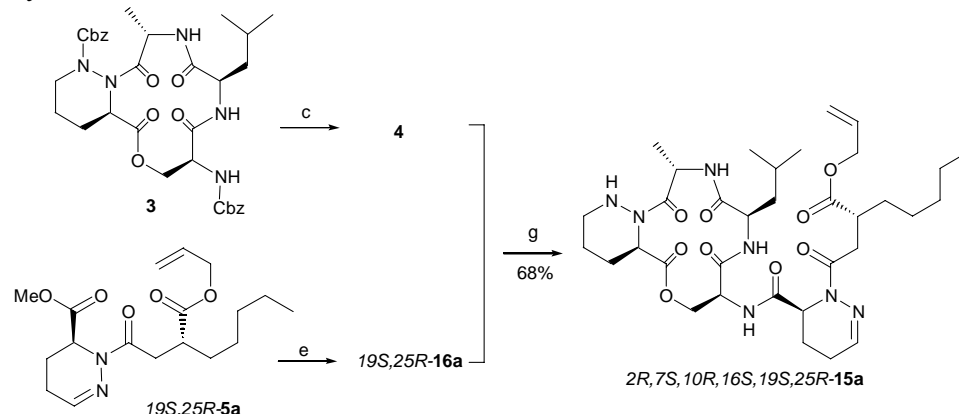

**Reagents and reaction conditions:** (c) H<sub>2</sub>, Pd/C, MeOH; (e) LiOH, THF-MeOH-H<sub>2</sub>O; (g) HATU, HOAt, DIPEA, DMF;

Compound **3** (0.19 g, 0.3 mmol) was dissolved in methanol (20 mL). After a catalytic amount of Pd/C (10%) was added, the reaction mixture was exposed to hydrogen atmosphere. The reaction was monitored by thin layer chromatography until all the starting material was consumed (ca 3 h). It was then filtered through a pad of Celite to remove the catalyst, and the filtrate was concentrated in *vacuo* to afford the free amine **4**. While **19S,25R-5a** (0.12 g, 0.33 mmol) was dissolved in THF-H<sub>2</sub>O (ca 5 mL, 1 : 1) at 0 °C, lithium hydroxide (0.03 g, 0.66 mmol) was added to the solution. The reaction mixture was stirred at room temperature and monitored by thin layer chromatography until all starting ester was consumed (ca. 3 h). Volatiles were removed under reduced pressure and the residue was diluted with brine (5 mL) and extracted with diethyl ether (20 mL x 2). The organic phase was discarded, and the aqueous phase was acidified to pH 3 with citric acid (30mL, 15% solution in water) and extracted with ethyl acetate (30 mL x 3). The combined organic layers were washed with brine (30 mL), dried over sodium sulfate (anhydrous), filtered and concentrated in *vacuo* to give the corresponding acid **19S,25R-16a**. The above acid **19S,25R-16a** and free amine **4** were dissolved in DMF (30 mL) and chilled with an ice - water bath. HOAt (0.38 g, 0.99 mmol), followed by HATU (0.13 g, 0.99 mmol) were added, and diisopropylethylamine (0.87 mL, 5.0 mmol) was added 10 min later. The reaction mixture was stirred at room temperature for 24 h, before it was concentrated in *vacuo*. The residue was dissolved in ethyl acetate – benzene (200 mL, 3 : 1) and washed with water (50 mL), saturated sodium bicarbonate (50 mL) and brine (50 mL). The organic phase was dried over sodium sulfate (anhydrous), filtered and concentrated in *vacuo*. The residue was purified by flash chromatography (ethyl acetate : hexanes = 2 : 1) to produce **2R,7S,10R,16S,19S,25R-15a** (0.16 g, 68%). Analytical data: [ $\alpha$ ]<sub>D</sub><sup>22</sup> +27.0 (*c* 0.5, CHCl<sub>3</sub>); <sup>1</sup>H NMR (500 MHz, CDCl<sub>3</sub>):  $\delta$  0.87-0.90 (m, 6H), 0.92 (d, 3H, *J* = 6.5Hz), 1.26 (d, 3H, *J* = 6.5Hz), 1.30-1.35 (m, 6H), 1.60-1.86 (m, 9H), 2.19 (d, 1H, *J* = 17.5Hz), 2.30 (d, 1H, *J* = 13.5Hz), 2.39-2.42 (m, 2H), 2.71-2.78 (m, 1H), 2.83-2.88 (m, 1H), 2.94-2.97 (m, 1H), 3.04-3.14 (m, 2H), 3.91 (d, 1H, *J* = 11.5Hz), 4.28-4.32 (m, 1H), 4.41 (d, 1H, *J* = 8.5Hz), 4.55-4.60 (m, 3H), 4.70 (d, 1H, *J* = 7.0Hz), 5.12 (d, 1H, *J* = 5.0Hz), 5.20-5.23 (m, 2H), 5.32 (d, 1H, *J* = 17.0Hz), 5.47-5.50 (m, 1H), 5.87-5.91 (m, 1H), 6.64 (d, 1H, *J* = 9.0Hz), 7.01 (d, 1H, *J* = 3.5Hz), 7.27 (br s, 1H), 7.36 (d, 1H, *J* = 7.5Hz) ppm; <sup>13</sup>C NMR (125 MHz, CDCl<sub>3</sub>):  $\delta$  13.9, 16.9, 17.5, 20.4, 22.0(2C), 22.4, 22.9, 24.8(2C), 26.7, 31.6, 32.1, 35.7, 37.2, 41.7,

43.5, 47.1, 51.4, 51.6, 51.9, 52.7, 65.4, 66.4, 118.0, 132.2, 145.0, 169.0, 170.2, 170.3, 170.7, 173.1, 175.1, 175.5 ppm.

Synthesis of 2*R*,7*S*,10*R*,16*S*,19*R*,25*S*-**15b** from **3** and 19*R*,25*S*-**5b**

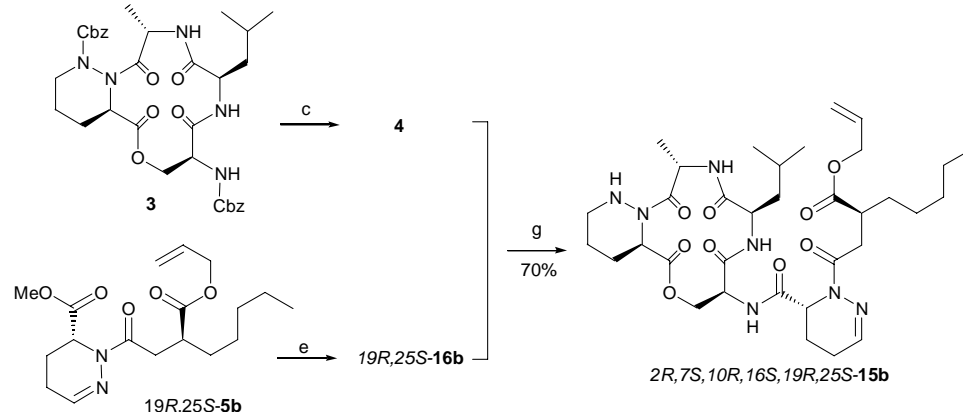

**Reagents and reaction conditions:** (c) H<sub>2</sub>, Pd/C, MeOH; (e) LiOH, THF-MeOH-H<sub>2</sub>O; (g) HATU, HOAt, DIPEA, DMF;

Compound **3** (0.19 g, 0.3 mmol) was dissolved in methanol (20 mL). After a catalytic amount of Pd/C (10%) was added, the reaction mixture was exposed to hydrogen atmosphere. The reaction was monitored by thin layer chromatography until all the starting material was consumed (ca 3 h). It was then filtered through a pad of Celite to remove the catalyst. The filtrate was concentrated in *vacuo* to afford the free amine **4**. While 19*R*,25*S*-**5b** (0.12 g, 0.33 mmol) was dissolved in THF-H<sub>2</sub>O (ca 5 mL, 1 : 1) at 0 °C. After lithium hydroxide (0.03 g, 0.66 mmol) was added to the solution, the reaction mixture was stirred at room temperature and monitored by thin layer chromatography until all starting ester was consumed (ca. 3 h). Volatiles were removed under reduced pressure and the residue was diluted with brine (5 mL) and extracted with diethyl ether (20 mL x 2). The organic phase was discarded, and the aqueous phase was acidified to pH 3 with citric acid (30mL, 15% solution in water) and extracted with ethyl acetate (30 mL x 3). The combined organic fractions were washed with brine (30 mL), dried over sodium sulfate (anhydrous), filtered and concentrated in *vacuo* to give the corresponding acid 19*R*,25*S*-**16b**. The above acid 19*R*,25*S*-**16b** and free amine **4** were dissolved in DMF (30 mL) and chilled with an ice - water bath. HOAt (0.38 g, 0.99 mmol), followed by HATU (0.13 g, 0.99 mmol), was added, and diisopropylethylamine (0.87 mL, 5.0 mmol) was added 10 min later. The reaction mixture was then stirred at room temperature for 24 h, before it was concentrated in *vacuo*. The residue was dissolved in ethyl acetate – benzene (200 mL, 3 : 1 ) and washed with water (50 mL), saturated sodium bicarbonate (50 mL) and brine (50 mL). The organic phase was dried over sodium sulfate (anhydrous), filtered and concentrated in *vacuo*. The residue was purified by flash chromatography (ethyl acetate : hexanes = 2 : 1) to produce 2*R*,7*S*,10*R*,16*S*,19*R*,25*S*-**15b** (0.16 g, 70%). Analytical data:  $[\alpha]_D^{22} +4.3$  (c 0.5, CHCl<sub>3</sub>); <sup>1</sup>H NMR (500 MHz, CDCl<sub>3</sub>): δ 0.87 (d, 3H, *J* = 6.0Hz), 0.88-0.91 (m, 6H), 1.28 (d, 3H, *J* = 7.0 Hz), 1.32-1.34 (m, 4H), 1.39-1.42 (m, 2H), 1.44-1.53 (m, 3H), 1.61-1.67 (m, 2H), 1.72-1.91 (m, 4H), 2.20-2.33 (m, 3H), 2.57-2.65 (m, 1H), 2.77 (q, 1H, *J* = 11.0Hz), 2.88 (dd, 1H, *J* = 4.0Hz, 17.0Hz), 3.02-3.05 (m, 1H), 3.26- 3.32 (m, 2H), 3.97 (d, 1H, *J* = 11.5Hz), 4.36-4.39 (m, 1H), 4.55-4.64 (m, 4H), 4.77 (dd, 1H, *J* = 2.5Hz, 9.0Hz), 4.94 (d, 1H, *J* = 4.5Hz), 5.22-5.25 (m, 2H), 5.32 (dd, 1H, *J* = 2.0Hz, 17.5Hz), 5.57-5.60 (m, 1H), 5.89-5.94 (m, 1H), 6.31 (d, 1H, *J* = 9.5Hz), 6.42 (d, 1H, *J* = 8.5Hz), 7.06 (d, 1H, *J* = 4.0Hz), 7.46 (d, 1H, *J* = 9.0Hz) ppm; <sup>13</sup>C NMR (125 MHz, CDCl<sub>3</sub>): δ 14.0, 17.0, 17.4, 20.3, 22.0, 22.2, 22.5, 23.0, 24.7(2C), 26.6, 31.6, 32.2, 35.6, 37.4, 41.1, 43.3, 46.9, 51.1, 51.3, 51.9, 52.0, 65.2, 66.3, 118.0, 132.3, 145.3, 168.8, 169.6, 170.0, 170.9, 173.4, 175.4, 176.0 ppm.

# Synthesis of 2*R*,7*S*,10*R*,16*S*,19*R*,25*R*-**15c** from **3** and 19*R*,25*R*-**5c**

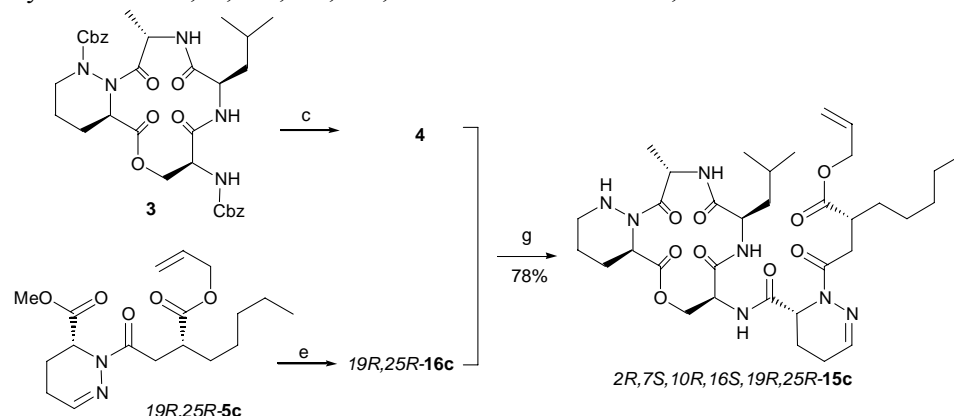

**Reagents and reaction conditions:** (c) H<sub>2</sub>, Pd/C, MeOH; (e) LiOH, THF-MeOH-H<sub>2</sub>O; (g) HATU, HOAt, DIPEA, DMF;

Compound **3** (0.26 g, 0.4 mmol) was dissolved in methanol (20 mL). After a catalytic amount of Pd/C (10%) was added, the reaction mixture was exposed to hydrogen atmosphere. The reaction was monitored by thin layer chromatography until all the starting material was consumed (ca 3 h). Then it was filtered through a pad of Celite to remove the catalyst, the filtrate was concentrated in *vacuo* to afford the free amine **4**. While 19*R*,25*R*-**5c** (0.16 g, 0.44 mmol) was dissolved in THF-H<sub>2</sub>O (ca 5 mL, 1 : 1) at 0 °C. After lithium hydroxide (0.04 g, 0.88 mmol) was added, the reaction mixture was stirred at room temperature and monitored by thin layer chromatography until all starting ester was consumed (ca. 3 h). Volatiles were removed under reduced pressure and the residue was diluted with brine (5 mL) and extracted with diethyl ether (20 mL x 2). The organic phase was discarded, while the aqueous phase was acidified to pH 3 with citric acid (30mL, 15% solution in water) and extracted with ethyl acetate (30 mL x 3). The combined organic fractions were washed with brine (30 mL), dried over sodium sulfate (anhydrous), filtered and concentrated in *vacuo* to give the corresponding acid 19*R*,25*R*-**16c**. The above acid 19*R*,25*R*-**16c** and free amine **4** were dissolved in DMF (30 mL) and chilled with an ice - water bath. HOAt (0.50 g, 1.32 mmol), followed by HATU (0.18 g, 1.32 mmol), were added, and diisopropylethylamine (1.16 mL, 6.6 mmol) was added 10 min later. The reaction mixture was then stirred at room temperature for 24 h, before it was concentrated in *vacuo*. The residue was dissolved in ethyl acetate – benzene (200 mL, 3 : 1) and washed with water (50 mL), saturated sodium bicarbonate (50 mL) and brine (50 mL). The organic phase was dried over sodium sulfate (anhydrous), filtered and concentrated in *vacuo*. The residue was purified by flash chromatography (ethyl acetate : hexanes = 2 : 1) to produce 2*R*,7*S*,10*R*,16*S*,19*R*,25*R*-**15c** (0.21 g, 68%). Analytical data:  $[\alpha]_D^{22} +45.0$  (*c* 0.5, CHCl<sub>3</sub>); <sup>1</sup>H NMR (500 MHz, CDCl<sub>3</sub>): δ 0.86-0.89 (m, 6H), 0.91 (d, 3H, *J* = 7.0Hz), 1.26 (d, 3H, *J* = 6.5 Hz), 1.31-1.35 (m, 6H), 1.53-1.61(m, 5H), 1.73-1.81 (m, 4H), 2.24-2.32 (m, 3H), 2.46-2.49 (m, 1H), 2.56 (dd, 1H, *J* = 4.5Hz, 15.0Hz), 2.69-2.78 (m, 1H), 3.05-3.07 (m, 2H), 3.40-3.42 (m, 1H), 4.13 (d, 1H, *J* = 11.5Hz), 4.30 (d, 1H, *J* = 6.5Hz), 4.47-4.49 (m, 1H), 4.56-4.58 (m, 2H), 4.62-4.64 (m, 2H), 5.15 (s, 1H), 5.23-5.25 (m, 2H), 5.34 (dd, 1H, *J* = 1.5Hz, 17.0Hz), 5.49-5.53 (m, 1H), 5.86-5.94 (m, 1H), 6.55 (d, 1H, *J* = 9.0Hz), 6.90 (d, 1H, *J* = 3.0Hz), 7.01 (s, 1H), 7.38 (d, 1H, *J* = 7.0Hz) ppm; <sup>13</sup>C NMR (125 MHz, CDCl<sub>3</sub>): δ 13.9, 16.9, 17.8, 20.6, 21.8(2C), 22.4, 23.0, 24.6, 24.8, 26.7, 29.6, 31.6(2C), 34.3, 37.2, 42.4, 43.5, 47.0, 51.5, 51.7, 53.1, 65.8(2C), 118.1, 131.9, 144.8, 168.8, 170.0(2C), 170.6, 173.3, 174.7, 175.9 ppm.

### Synthesis of 2*R*,7*S*,10*R*,16*S*,19*S*,25*S*-1

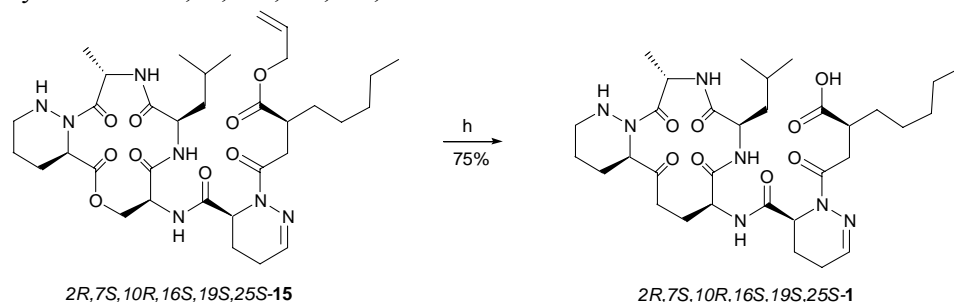

**Reagents and reaction conditions:** (h) Pd<sub>2</sub>dba<sub>3</sub>, Ph<sub>3</sub>P, Et<sub>2</sub>NH.

To 2*R*,7*S*,10*R*,16*S*,19*S*,25*S*-15 (0.028 g, 0.04 mmol), Pd<sub>2</sub>dba<sub>3</sub> (0.003 g, 0.004 mmol), PPh<sub>3</sub> (0.002 g, 0.008 mmol) in dry THF under N<sub>2</sub> atmosphere was added diethylamine (0.04 mL, 0.4 mmol). The reaction solution was stirred at room temperature for 2h. Volatiles were removed under reduced pressure. The residue was dissolved in ethyl acetate (100 mL) and washed with HCl (20 mL, 1N solution in water), brine (20 mL). The organic layer was dried over sodium sulfate (anhydrous), filtered and concentrated in *vacuo*. Purification was performed with semi-preparative HPLC (Agilent 1200 system, using a reversed-phase C18 SG300 column (S-5uM, 10.0 mm i.d. x 150 mm length, from Fine Chemicals, Shiseido CAPCELL PAK), eluting with a gradient consisting of water / MeCN from 98 : 2 to 30 : 70 within 10min, flow rate was 10 mL min<sup>-1</sup>, temperature was 25 °C and the DAD detector was set at 220 nm wave length), to afford 2*R*,7*S*,10*R*,16*S*,19*S*,25*S*-1 (0.02 g, 75%, Retention time for HPLC: 8.495 min). Analytical data: [α]<sub>D</sub><sup>22</sup> +16.1 (c 0.5, CHCl<sub>3</sub>); <sup>1</sup>H NMR (500 MHz, CDCl<sub>3</sub>): δ 0.85-0.95 (m, 9H), 1.28 (d, 3H, *J* = 7.0Hz), 1.34 (br, 5H), 1.41-1.42 (m, 3H), 1.59-1.62 (m, 3H), 1.67-1.75 (m, 3H), 1.85-1.88 (m, 2H), 2.02-2.09 (m, 1H), 2.20-2.27 (m, 3H), 2.63-2.71 (m, 3H), 3.32 (br s, 1H), 3.58-3.63 (m, 1H), 4.36 (d, 1H, *J* = 11.0Hz), 4.52-4.57 (m, 2H), 5.11 (d, 1H, *J* = 4.5Hz), 5.24 (d, 1H, *J* = 9.5Hz), 5.43 (s, 1H), 5.64-5.67 (m, 1H), 6.72 (d, 1H, *J* = 7.5Hz), 6.79 (d, 1H, *J* = 10.0Hz), 6.98-7.01 (m, 2H) ppm; <sup>13</sup>C NMR (125 MHz, CDCl<sub>3</sub>): δ 14.1, 16.9, 18.8, 21.2, 22.2, 22.5, 22.7, 22.9, 24.9, 25.0, 27.1, 31.5, 31.8, 32.4, 37.5, 41.6, 43.9, 46.2, 50.5, 51.9, 52.1(2C), 68.8, 145.0, 168.9, 170.2, 171.4, 172.5, 172.7, 174.5, 181.4 ppm; HR-ESIMS for C<sub>31</sub>H<sub>49</sub>N<sub>7</sub>O<sub>9</sub>Na (M+Na): *m/z*, calculated: 686.3489; found: 686.3485.

### Synthesis of 2*R*,7*S*,10*R*,16*S*,19*S*,25*R*-1a

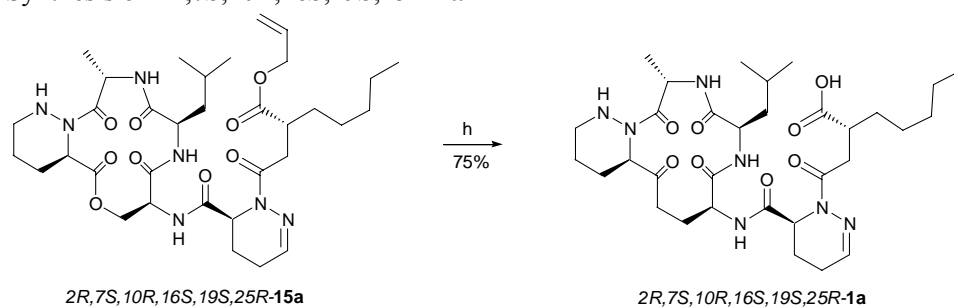

**Reagents and reaction conditions:** (h) Pd<sub>2</sub>dba<sub>3</sub>, Ph<sub>3</sub>P, Et<sub>2</sub>NH.

To 2*R*,7*S*,10*R*,16*S*,19*S*,25*R*-15a (0.028 g, 0.04 mmol), Pd<sub>2</sub>dba<sub>3</sub> (0.003 g, 0.004 mmol), PPh<sub>3</sub> (0.002 g, 0.008 mmol) in dry THF under N<sub>2</sub> atmosphere was added diethylamine (0.04 mL, 0.4 mmol). The reaction solution was stirred at room temperature for 2h. Volatiles were removed under reduced pressure. The residue was dissolved in ethyl acetate (100 mL) and washed with HCl (20 mL, 1N solution in water), brine (20 mL). The organic layer was dried over sodium sulfate (anhydrous), filtered and concentrated in *vacuo*. Purification was performed with semi-preparative HPLC (Agilent 1200 system, using a reversed-phase C18 SG300 column (S-5uM, 10.0 mm i.d. x 150 mm length, from Fine Chemicals, Shiseido CAPCELL PAK), eluting with a gradient consisting of water / MeCN from 98 : 2 to 30 : 70

within 10 min, flow rate was 10 mL min<sup>-1</sup>, temperature was 25 °C and the DAD detector was set at 220 nm wave length), to afford **2R,7S,10R,16S,19S,25S-1a** (0.02 g, 75%, Retention time for HPLC: 8.423 min). Analytical data:  $[\alpha]_D^{22} +32.9$  (c 0.5, CHCl<sub>3</sub>); <sup>1</sup>H NMR (500 MHz, CDCl<sub>3</sub>): δ 0.88-0.90 (m, 6H), 0.94 (d, 3H, *J* = 4.0Hz), 1.28-1.33 (m, 9H), 1.42 (br s, 2H), 1.55-1.58 (m, 2H), 1.65 (br s, 2H), 1.76-1.83 (m, 3H), 1.94-2.05 (m, 2H), 2.22-2.29 (m, 3H), 2.61 (d, 1H, *J* = 11.0Hz), 2.70 (d, 1H, *J* = 12.0Hz), 2.76 (br s, 1H), 2.88-2.91 (m, 1H), 3.54 (dd, 1H, *J* = 5.0Hz, 13.0Hz), 4.35 (d, 1H, *J* = 11.5Hz), 4.49 (d, 1H, *J* = 5.5Hz), 4.59 (dd, 1H, *J* = 4.0Hz, 11.5Hz), 5.15 (d, 2H, *J* = 4.0Hz), 5.27 (d, 1H, *J* = 6.5Hz), 5.70 (br s, 1H), 6.87 (br s, 1H), 7.04 (s, 1H), 7.27 (d, 1H, *J* = 2.0Hz), 7.39 (br s, 1H) ppm; <sup>13</sup>C NMR (125 MHz, CDCl<sub>3</sub>): δ 14.0, 16.8, 18.8, 20.8, 22.1(2C), 22.5, 22.8, 24.6, 25.0, 27.5, 31.2, 31.6, 37.1(2C), 43.4, 43.5, 46.1, 50.7, 51.7, 51.8, 52.9, 68.5, 144.6, 168.8, 170.1, 171.4, 172.1, 172.6, 174.2, 180.7 ppm.

### Synthesis of **2R,7S,10R,16S,19R,25S-1b**

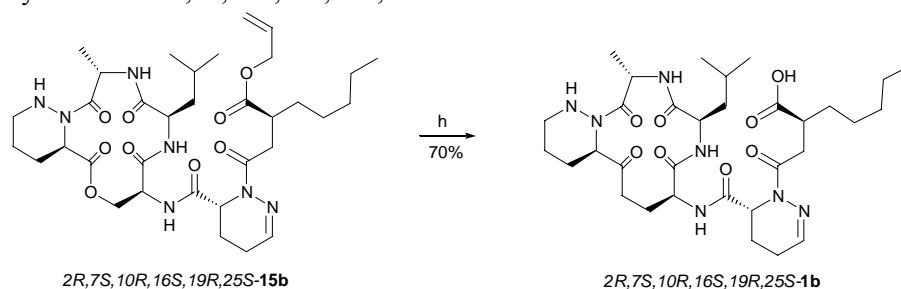

**Reagents and reaction conditions:** (h) Pd<sub>2</sub>dba<sub>3</sub>, Ph<sub>3</sub>P, Et<sub>2</sub>NH.

To **2R,7S,10R,16S,19R,25S-15b** (0.028 g, 0.04 mmol), Pd<sub>2</sub>dba<sub>3</sub> (0.003 g, 0.004 mmol), PPh<sub>3</sub> (0.002 g, 0.008 mmol) in dry THF under N<sub>2</sub> atmosphere was added diethylamine (0.04 mL, 0.4 mmol). The reaction solution was stirred at room temperature for 2h. Volatiles were removed under reduced pressure, the residue was dissolved in ethyl acetate (100 mL) and washed with HCl (20 mL, 1N solution in water), brine (20 mL). The organic layer was dried over sodium sulfate (anhydrous), filtered and concentrated in *vacuo*. Purification was performed with semi-preparative HPLC (Agilent 1200 system, using a reversed-phase C18 SG300 column (S-5uM, 10.0 mm i.d. x 150 mm length, from Fine Chemicals, Shiseido CAPCELL PAK), eluting with a gradient consisting of water / MeCN from 98 : 2 to 30 : 70 within 10min, flow rate was 10 mL min<sup>-1</sup>, temperature was 25 °C and the DAD detector was set at 220 nm wave length), to afford **2R,7S,10R,16S,19R,25S-1b** (0.019 g, 70%, Retention time for HPLC: 8.392 min). Analytical data:  $[\alpha]_D^{22} +109.0$  (c 0.3, CHCl<sub>3</sub>); <sup>1</sup>H NMR (500 MHz, CDCl<sub>3</sub>): δ 0.87 (br s, 6H), 0.92 (br s, 3H), 1.26-1.28 (m, 4H), 1.34 (br s, 4H), 1.42 (br s, 3H), 1.55-1.64 (m, 6H), 1.90 (br s, 2H), 2.20 (d, 1H, *J* = 7.0Hz), 2.31 (d, 2H, *J* = 13.5Hz), 2.40-2.47 (m, 1H), 2.54 (br, 1H), 2.69-2.74 (m, 1H), 2.93 (d, 1H, *J* = 12.5Hz), 3.24-3.32 (m, 1H), 3.41 (br s, 1H), 4.55-4.59 (m, 3H), 4.98 (d, 1H, *J* = 8.0Hz), 5.16 (s, 1H), 5.21 (s, 1H), 5.61 (br s, 1H), 6.73 (d, 1H, *J* = 10.0Hz), 6.98 (s, 1H), 7.59 (m, 2H) ppm; <sup>13</sup>C NMR (75 MHz, CDCl<sub>3</sub>): δ 14.0, 16.7, 16.9, 20.5, 21.7, 22.2, 22.5, 22.9, 24.6, 25.0, 26.9, 29.7, 31.6(2C), 37.1, 41.8, 43.8, 46.6, 50.2, 51.1, 51.7, 52.4, 67.7, 144.4, 169.2, 170.3, 171.0, 172.6 (2C), 175.3, 179.2 ppm.

### Synthesis of **2R,7S,10R,16S,19R,25R-1c**

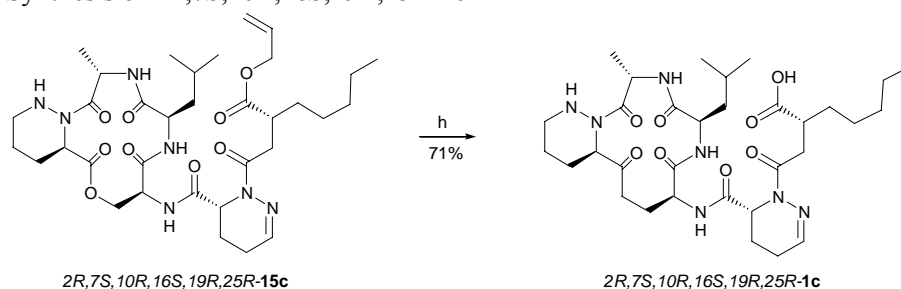

**Reagents and reaction conditions:** (h) Pd<sub>2</sub>dba<sub>3</sub>, Ph<sub>3</sub>P, Et<sub>2</sub>NH.

To *2R,7S,10R,16S,19R,25R-15c* (0.028 g, 0.04 mmol), Pd<sub>2</sub>dba<sub>3</sub> (0.003 g, 0.004 mmol), PPh<sub>3</sub> (0.002 g, 0.008 mmol) in dry THF under N<sub>2</sub> atmosphere was added diethylamine (0.04 mL, 0.4 mmol). The reaction solution was stirred at room temperature for 2h. Volatiles were removed under reduced pressure. The residue was dissolved in ethyl acetate (100 mL) and washed with HCl (20 mL, 1N solution in water), brine (20 mL). The organic layer was dried over sodium sulfate (anhydrous), filtered and concentrated in *vacuo*. Purification was performed with semi-preparative HPLC (Agilent 1200 system, using a reversed-phase C18 SG300 column (S-5uM, 10.0 mm i.d. x 150 mm length, from Fine Chemicals, Shiseido CAPCELL PAK), eluting with a gradient consisting of water / MeCN from 98 : 2 to 30 : 70 within 10min, flow rate was 10 mL min<sup>-1</sup>, temperature was 25 °C and the DAD detector was set at 220 nm wave length), to afford *2R,7S,10R,16S,19R,25R-1c* (0.019 g, 71%, Retention time for HPLC: 8.547 min). Analytical data:  $[\alpha]_D^{22} +178.6$  (c 0.5, CHCl<sub>3</sub>); <sup>1</sup>H NMR (500 MHz, CDCl<sub>3</sub>): δ 0.87-0.93 (m, 9H), 1.28 (d, 3H, *J* = 7.0 Hz), 1.34 (br s, 4H), 1.43 (br, 2H), 1.57-1.66 (m, 6H), 1.74-1.80 (m, 1H), 1.86-1.90 (m, 2H), 2.19-2.26 (m, 2H), 2.30 (d, 1H, *J* = 14.0Hz), 2.50-2.56 (m, 2H), 2.76-2.79 (m, 1H), 3.03-3.05 (m, 1H), 3.15 (d, 1H, *J* = 13.5Hz), 3.42 (d, 1H, *J* = 13.0Hz), 3.71 (dd, 1H, *J* = 12.5Hz, 16.5Hz), 4.54-4.57 (m, 2H), 4.68-4.70 (m, 1H), 5.07 (d, 1H, *J* = 10.5Hz), 5.21 (d, 1H, *J* = 5.0Hz), 5.25 (s, 1H), 5.52-5.56 (m, 1H), 6.79 (d, 1H, *J* = 9.5Hz), 7.04 (d, 1H, *J* = 4.0Hz), 7.12 (d, 1H, *J* = 10.0Hz), 7.70 (d, 1H, *J* = 9.0Hz) ppm; <sup>13</sup>C NMR (75 MHz, CDCl<sub>3</sub>): δ 14.0, 16.7, 16.8, 20.7, 22.0, 22.2, 22.4, 22.8, 24.6, 24.8, 26.7, 30.7, 31.7, 32.8, 36.4, 40.9, 43.9, 47.4, 50.5, 50.6, 51.8, 52.4, 68.1, 145.1, 169.1, 170.7, 171.1, 172.4, 173.2, 176.4, 178.7 ppm.

## Towards the Stereochemical Assignment of Natural Lydiamycin A

Bo Chen,<sup>a</sup> Lu Dai,<sup>a</sup> Hui Zhang,<sup>a</sup> Wenfei Tan,<sup>a</sup> Zhengshuang Xu,<sup>\* a,b</sup> and Tao Ye<sup>\*a,b</sup>

<sup>a</sup> Laboratory of Chemical Genomics, School of Chemical Biology and Biotechnology,  
Peking University Shenzhen Graduate School, Shenzhen 518055, China

<sup>b</sup> Department of Applied Biology and Chemical Technology,  
The Hong Kong Polytechnic University, Kowloon, Hong Kong, China

| Compound No.                                                                         | Spectra                                 | Page No. |
|--------------------------------------------------------------------------------------|-----------------------------------------|----------|
| <b>11</b>                                                                            | <sup>1</sup> H NMR, <sup>13</sup> C NMR | 1-2      |
| <b>7</b>                                                                             | <sup>1</sup> H NMR, <sup>13</sup> C NMR | 3-4      |
| <b>12</b>                                                                            | <sup>1</sup> H NMR, <sup>13</sup> C NMR | 5-6      |
| Alcohol from <b>12</b>                                                               | <sup>1</sup> H NMR, <sup>13</sup> C NMR | 7-8      |
| <b>3</b>                                                                             | <sup>1</sup> H NMR, <sup>13</sup> C NMR | 9-10     |
| <b>13'</b>                                                                           | <sup>1</sup> H NMR, <sup>13</sup> C NMR | 11-12    |
| <b>8</b>                                                                             | <sup>1</sup> H NMR, <sup>13</sup> C NMR | 13-14    |
| <b>5</b>                                                                             | <sup>1</sup> H NMR, <sup>13</sup> C NMR | 15-16    |
| <b>5a</b>                                                                            | <sup>1</sup> H NMR, <sup>13</sup> C NMR | 17-18    |
| <b>6'</b>                                                                            | <sup>1</sup> H NMR, <sup>13</sup> C NMR | 19-20    |
| <b>14</b>                                                                            | <sup>1</sup> H NMR, <sup>13</sup> C NMR | 21-22    |
| <b>15</b>                                                                            | <sup>1</sup> H NMR, <sup>13</sup> C NMR | 23-24    |
| <b>15a</b>                                                                           | <sup>1</sup> H NMR, <sup>13</sup> C NMR | 25-26    |
| <b>15b</b>                                                                           | <sup>1</sup> H NMR, <sup>13</sup> C NMR | 27-28    |
| <b>15c</b>                                                                           | <sup>1</sup> H NMR, <sup>13</sup> C NMR | 29-30    |
| <b>1</b>                                                                             | <sup>1</sup> H NMR, <sup>13</sup> C NMR | 31-32    |
| <b>1a</b>                                                                            | <sup>1</sup> H NMR, <sup>13</sup> C NMR | 33-34    |
| <b>1b</b>                                                                            | <sup>1</sup> H NMR, <sup>13</sup> C NMR | 35-36    |
| <b>1c</b>                                                                            | <sup>1</sup> H NMR, <sup>13</sup> C NMR | 37-38    |
| <b>Comparison of <sup>1</sup>H NMR of natural product<br/>and synthetic samples</b>  |                                         | 39       |
| <b>Comparison of <sup>13</sup>C NMR of natural product<br/>and synthetic samples</b> |                                         | 40       |

$^1\text{H}$  spectrum of **11**

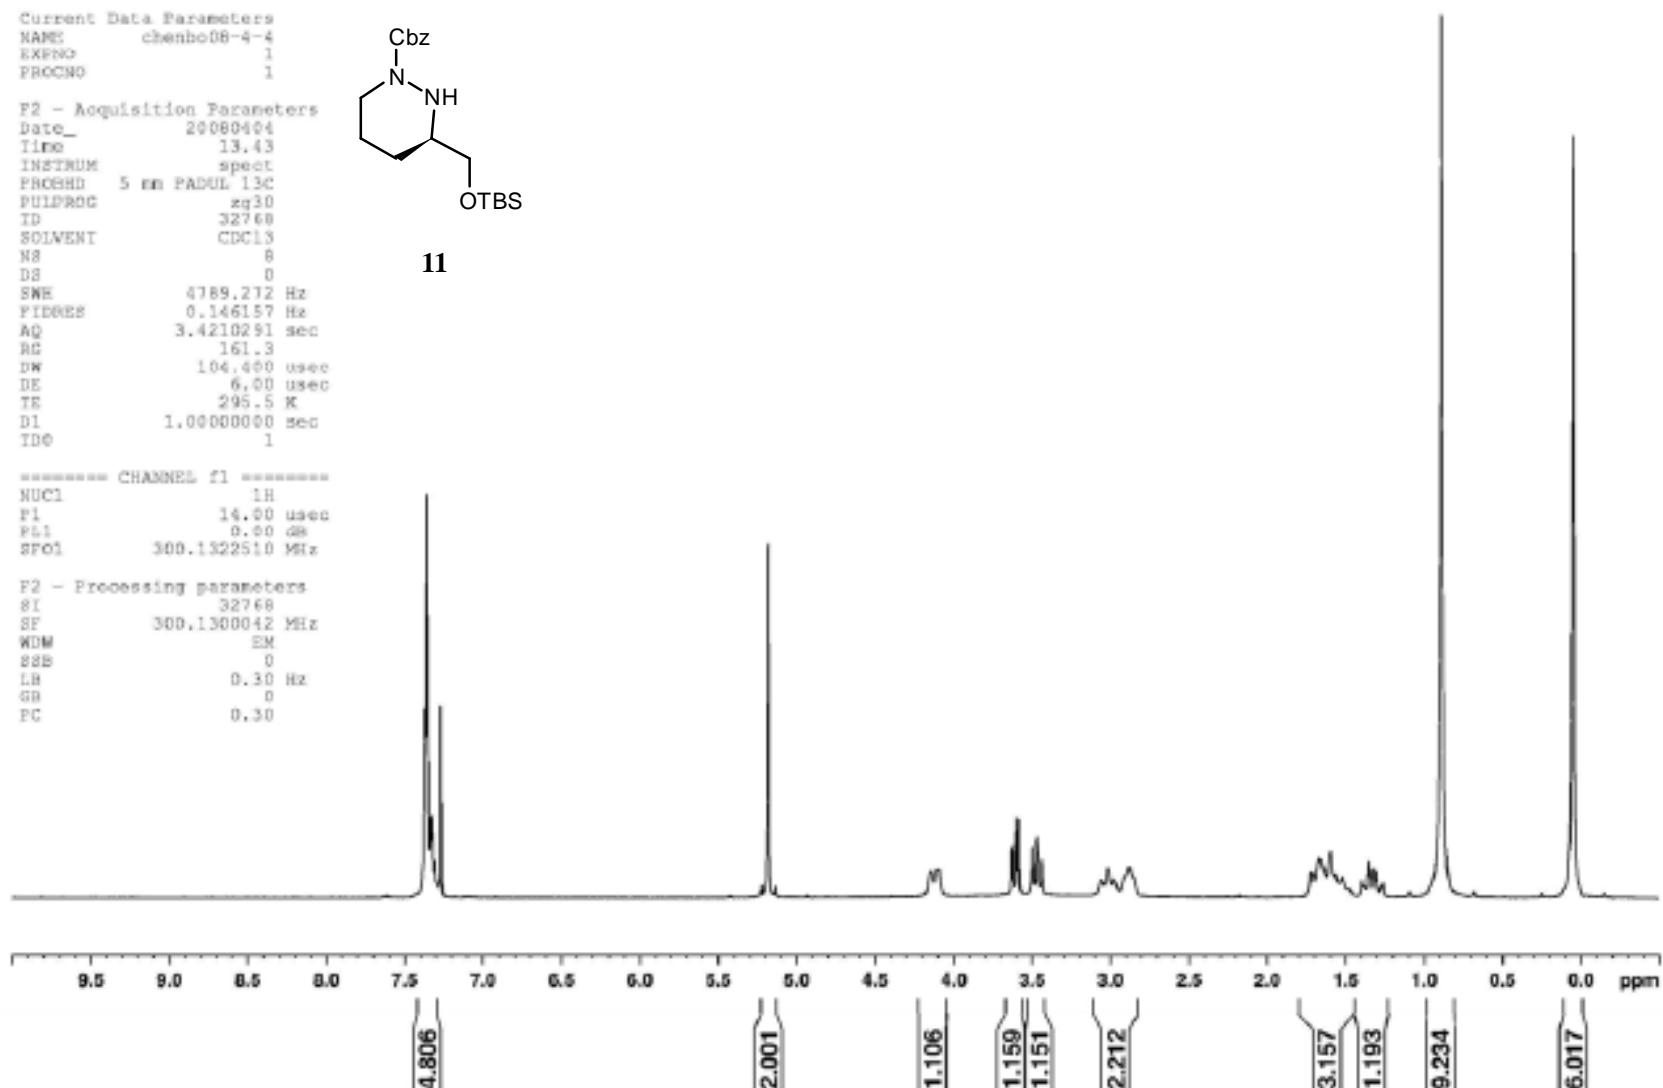

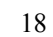

$^1\text{H}$  spectrum of **7**

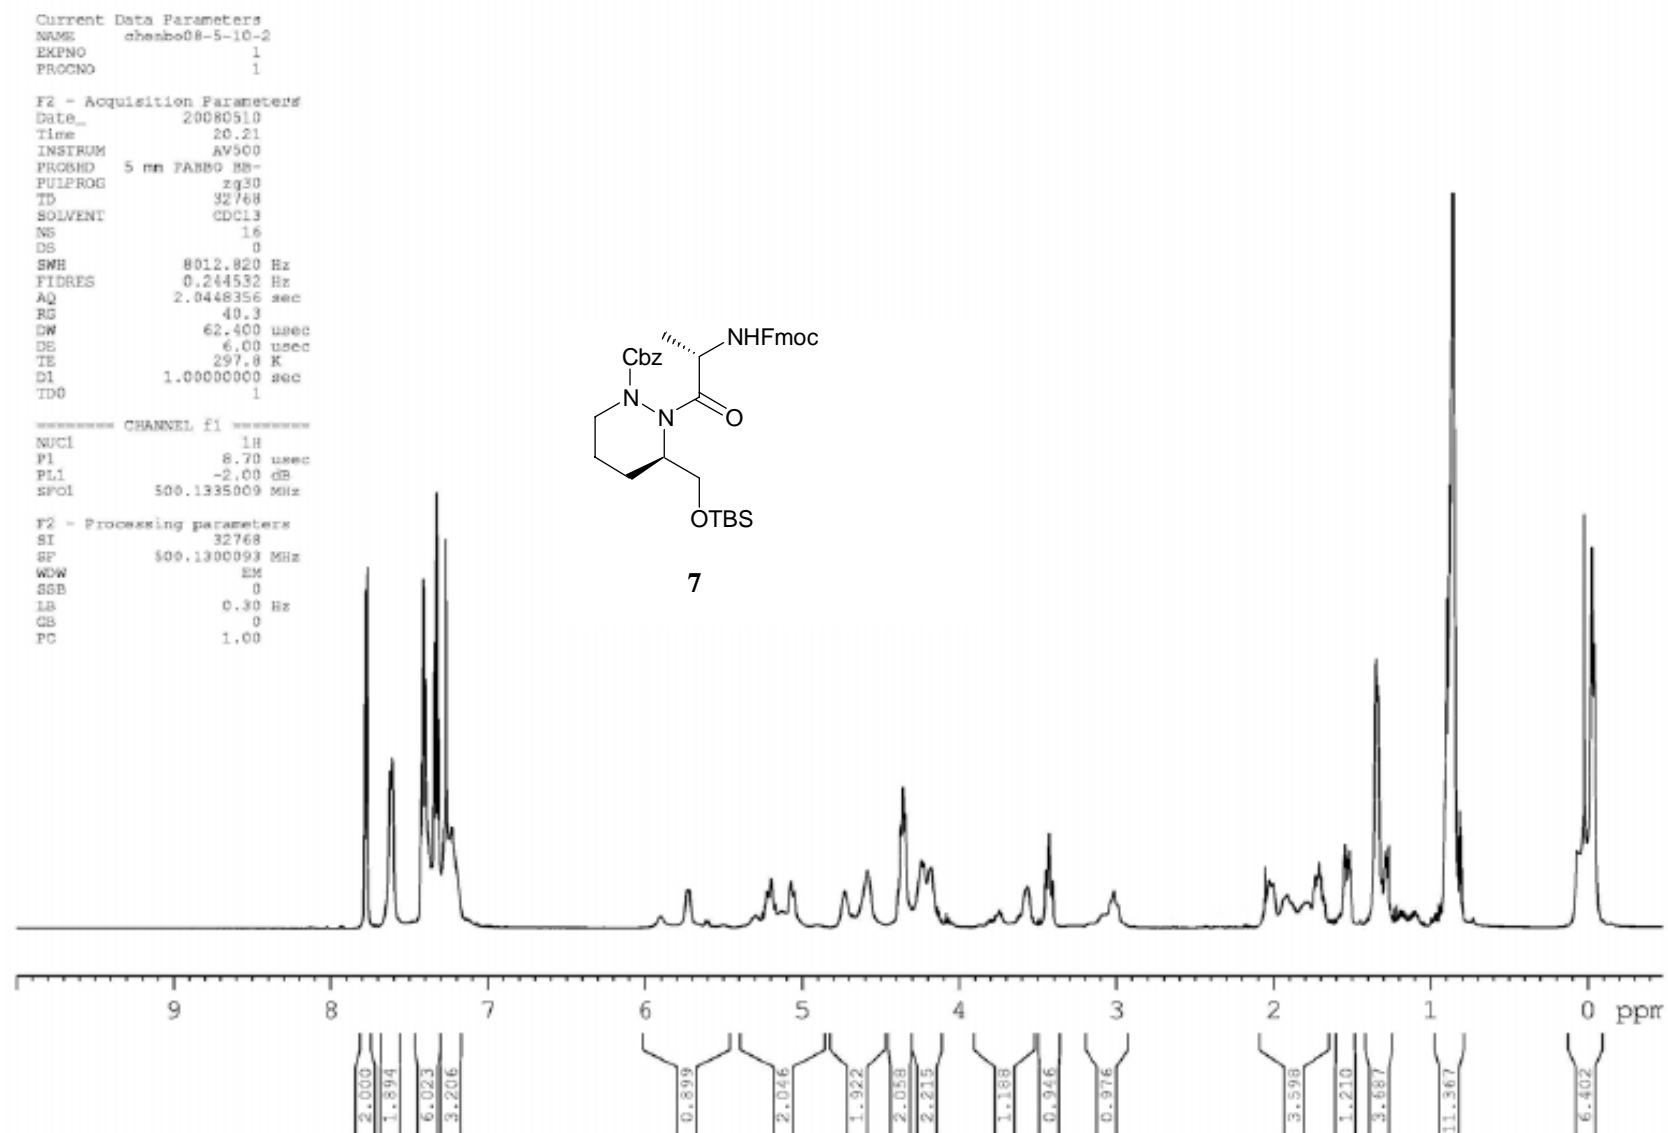

$^{13}\text{C}$  spectrum of **7**

```

Current Data Parameters
NAME      chembo08-5-10-2
EXPNO     2
PROCNO    1

F2 - Acquisition Parameters
Date_     20080510
Time      20.26
INSTRUM   AV500
PROBHD    5 mm PABBO BB-
PULPROG   zgpg30
TD        32768
SOLVENT   CDCl3
NS         1540
DS         0
SWH        30030.029 Hz
FIDRES     0.916444 Hz
AQ         0.5456530 sec
RG         645.1
CW         16.650 usec
DE         6.00 usec
TE         297.3 K
D1         1.00000000 sec
d11        0.03000000 sec
TD0        1

===== CHANNEL f1 =====
NUC1       13C
P1         7.00 usec
PL1        0.00 dB
SFO1       125.7703643 MHz

===== CHANNEL f2 =====
CPOPRG2    waltz16
NUC2       1H
PCPD2      80.00 usec
PL2        -2.00 dB
PL12       17.00 dB
SFO2       500.1320005 MHz

F2 - Processing parameters
SI         32768
SF         125.7577890 MHz
WDW        EM
SSB        0
LB         1.00 Hz
GB         0
PC         1.40
  
```

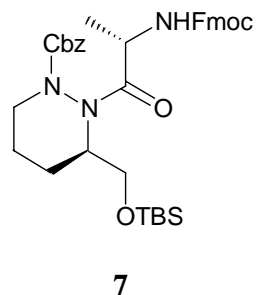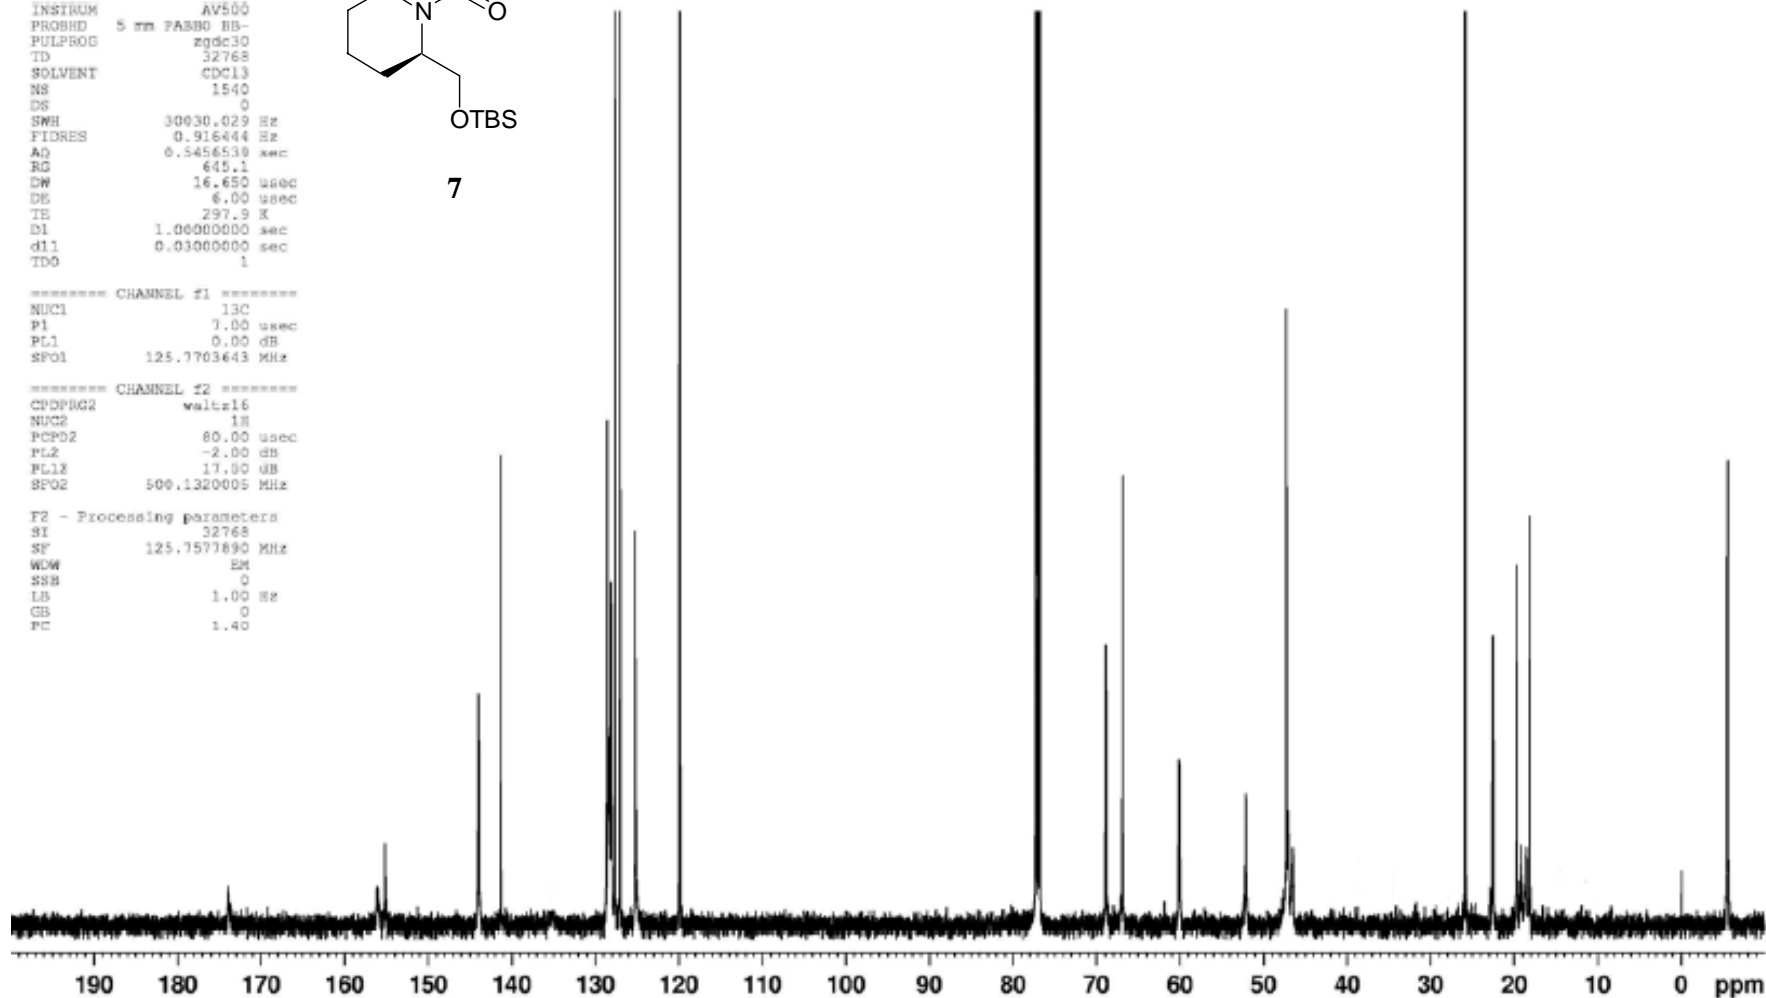

<sup>1</sup>H spectrum of **12**

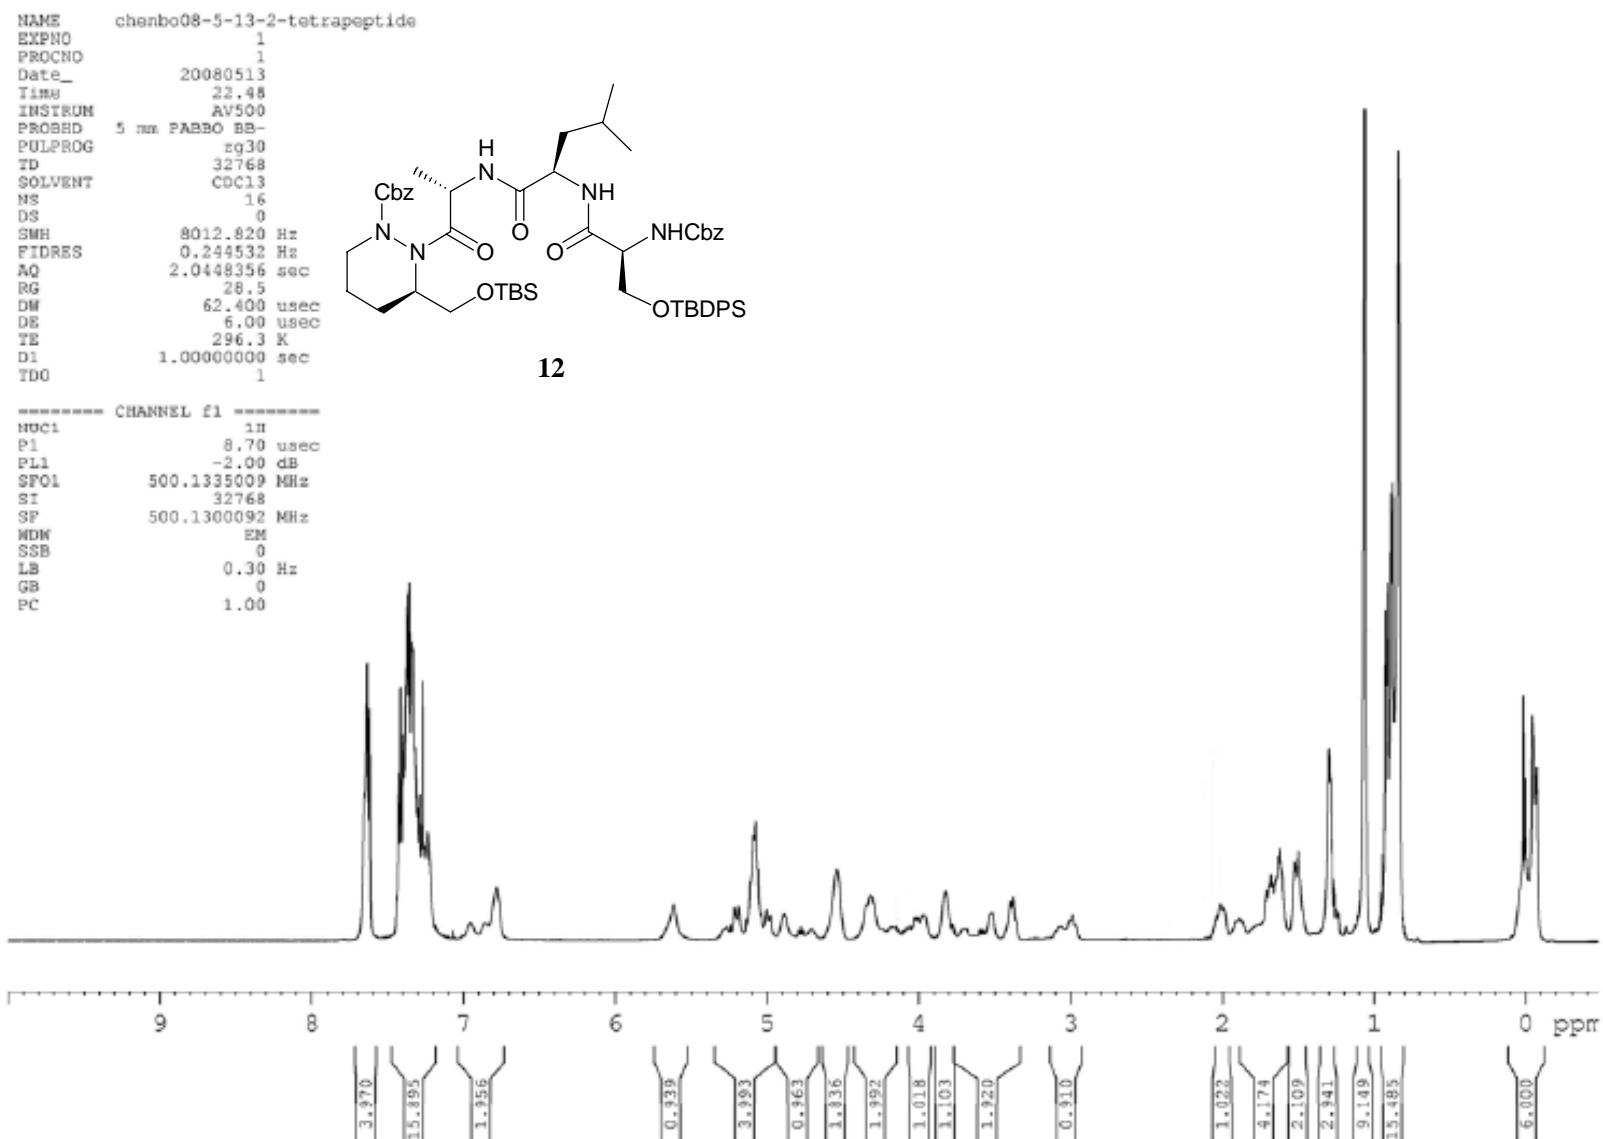

$^{13}\text{C}$  spectrum of **12**

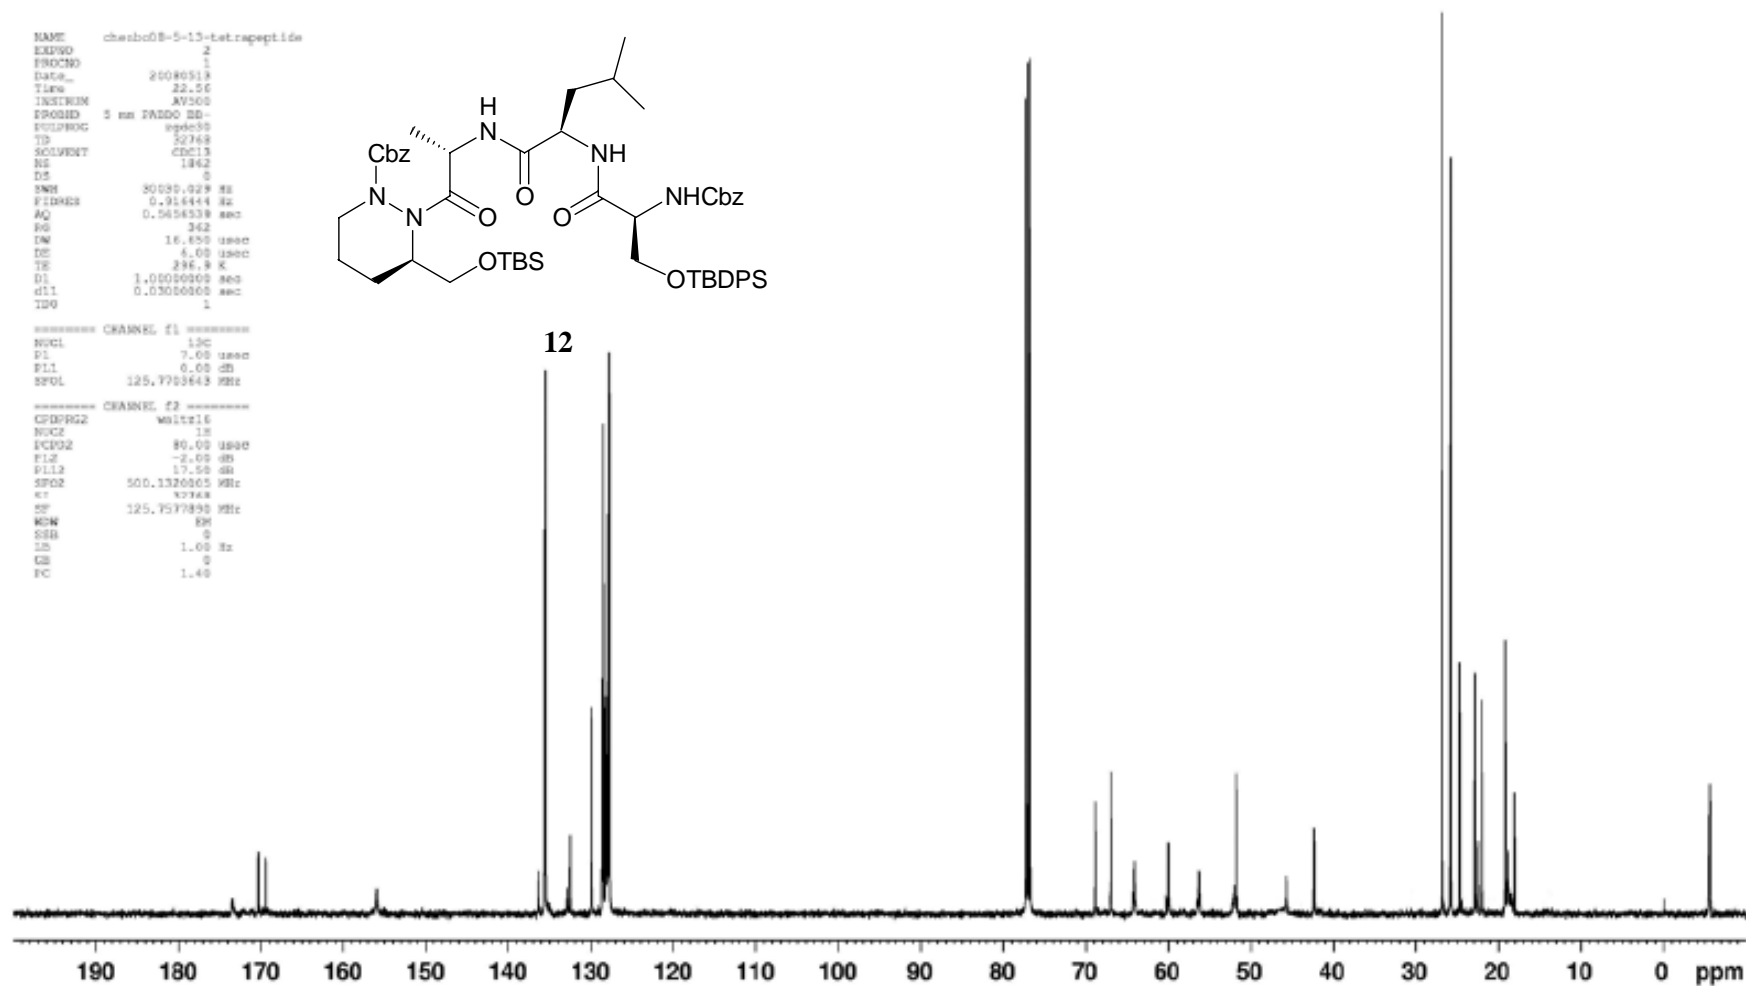

<sup>1</sup>H spectrum of alcohol from **12**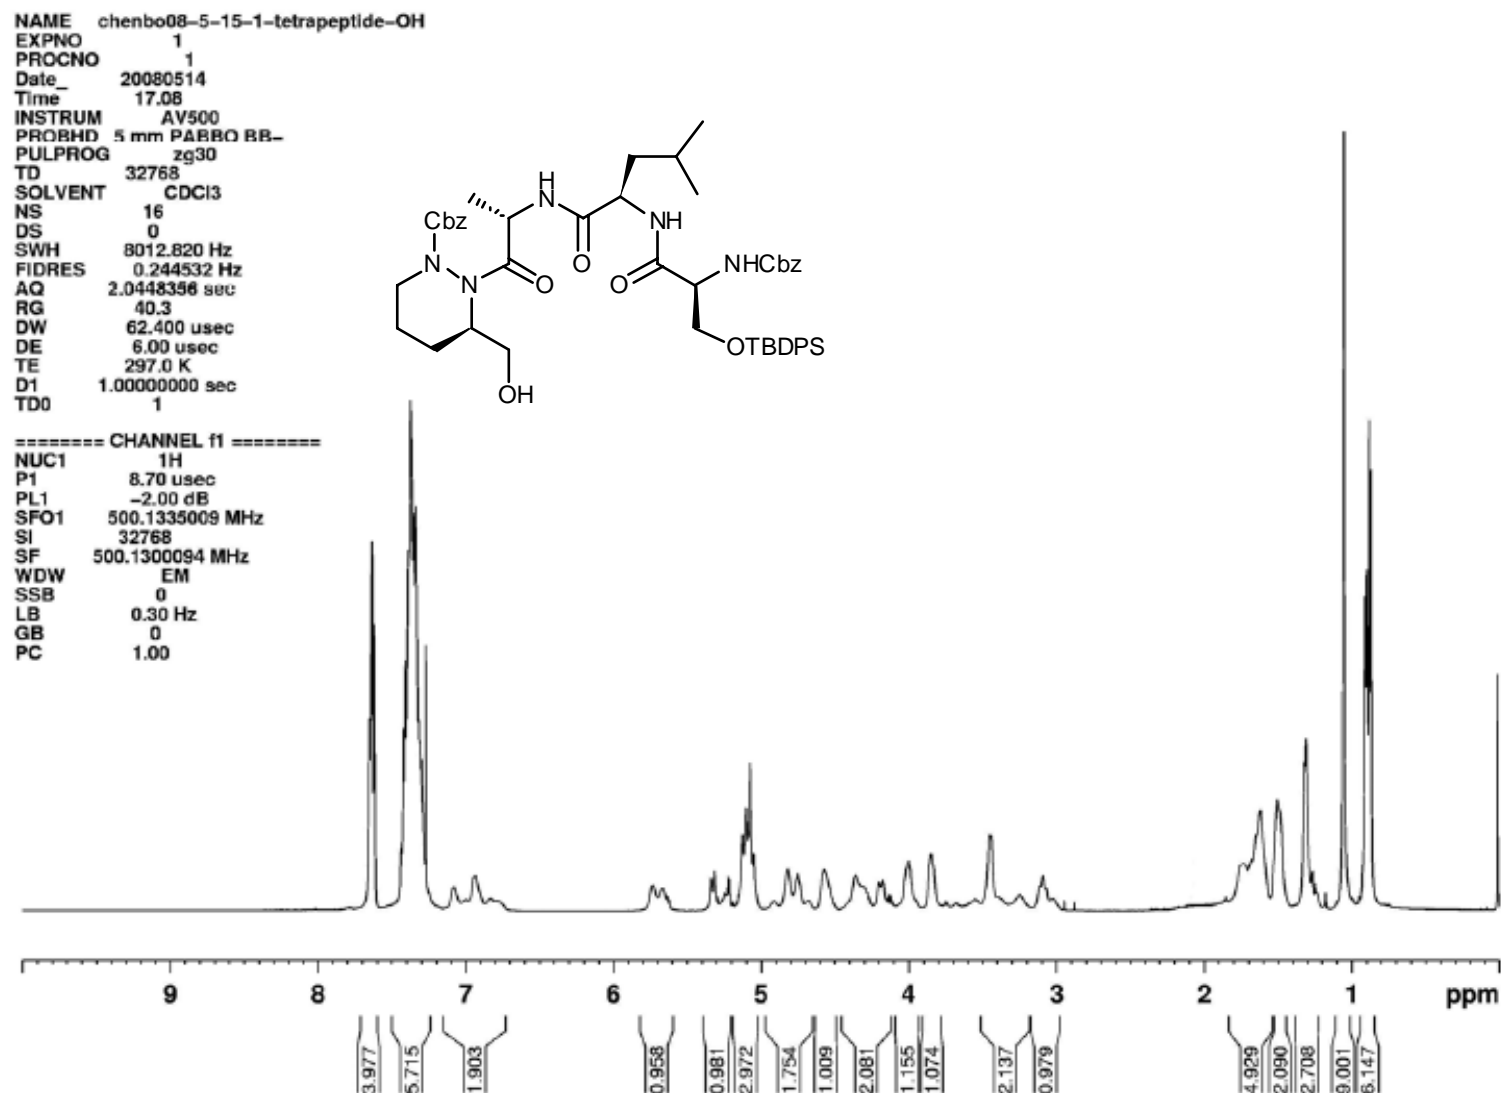

$^{13}\text{C}$  spectrum of alcohol from **12**

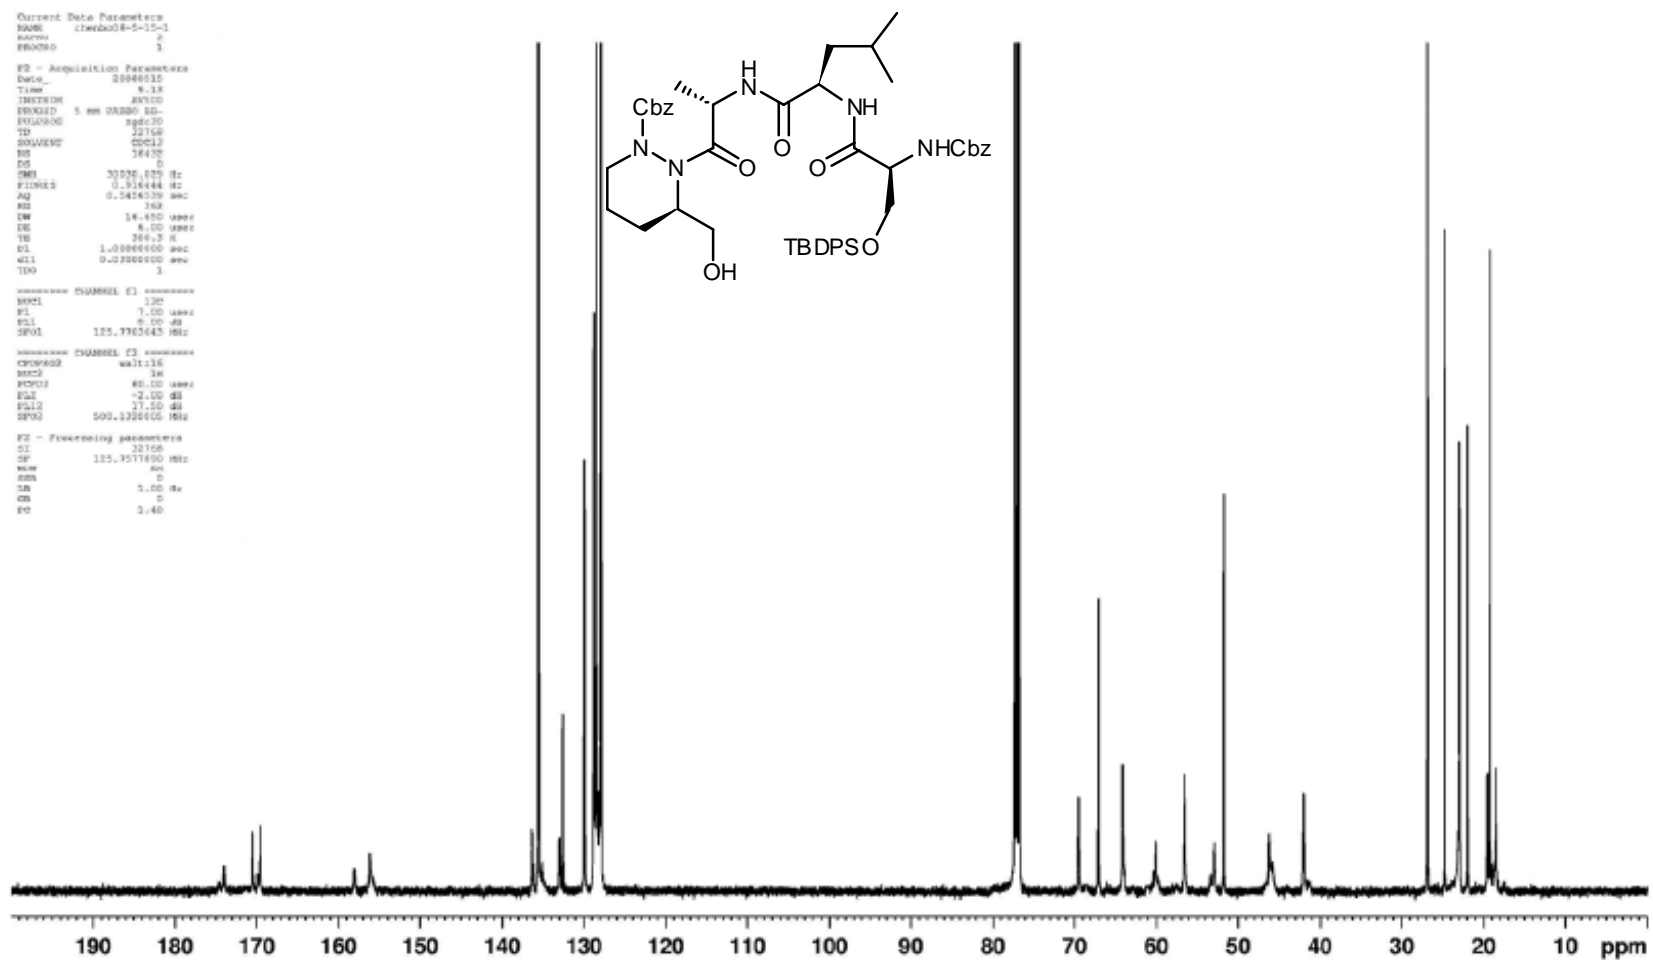

$^1\text{H}$  spectrum of **3**

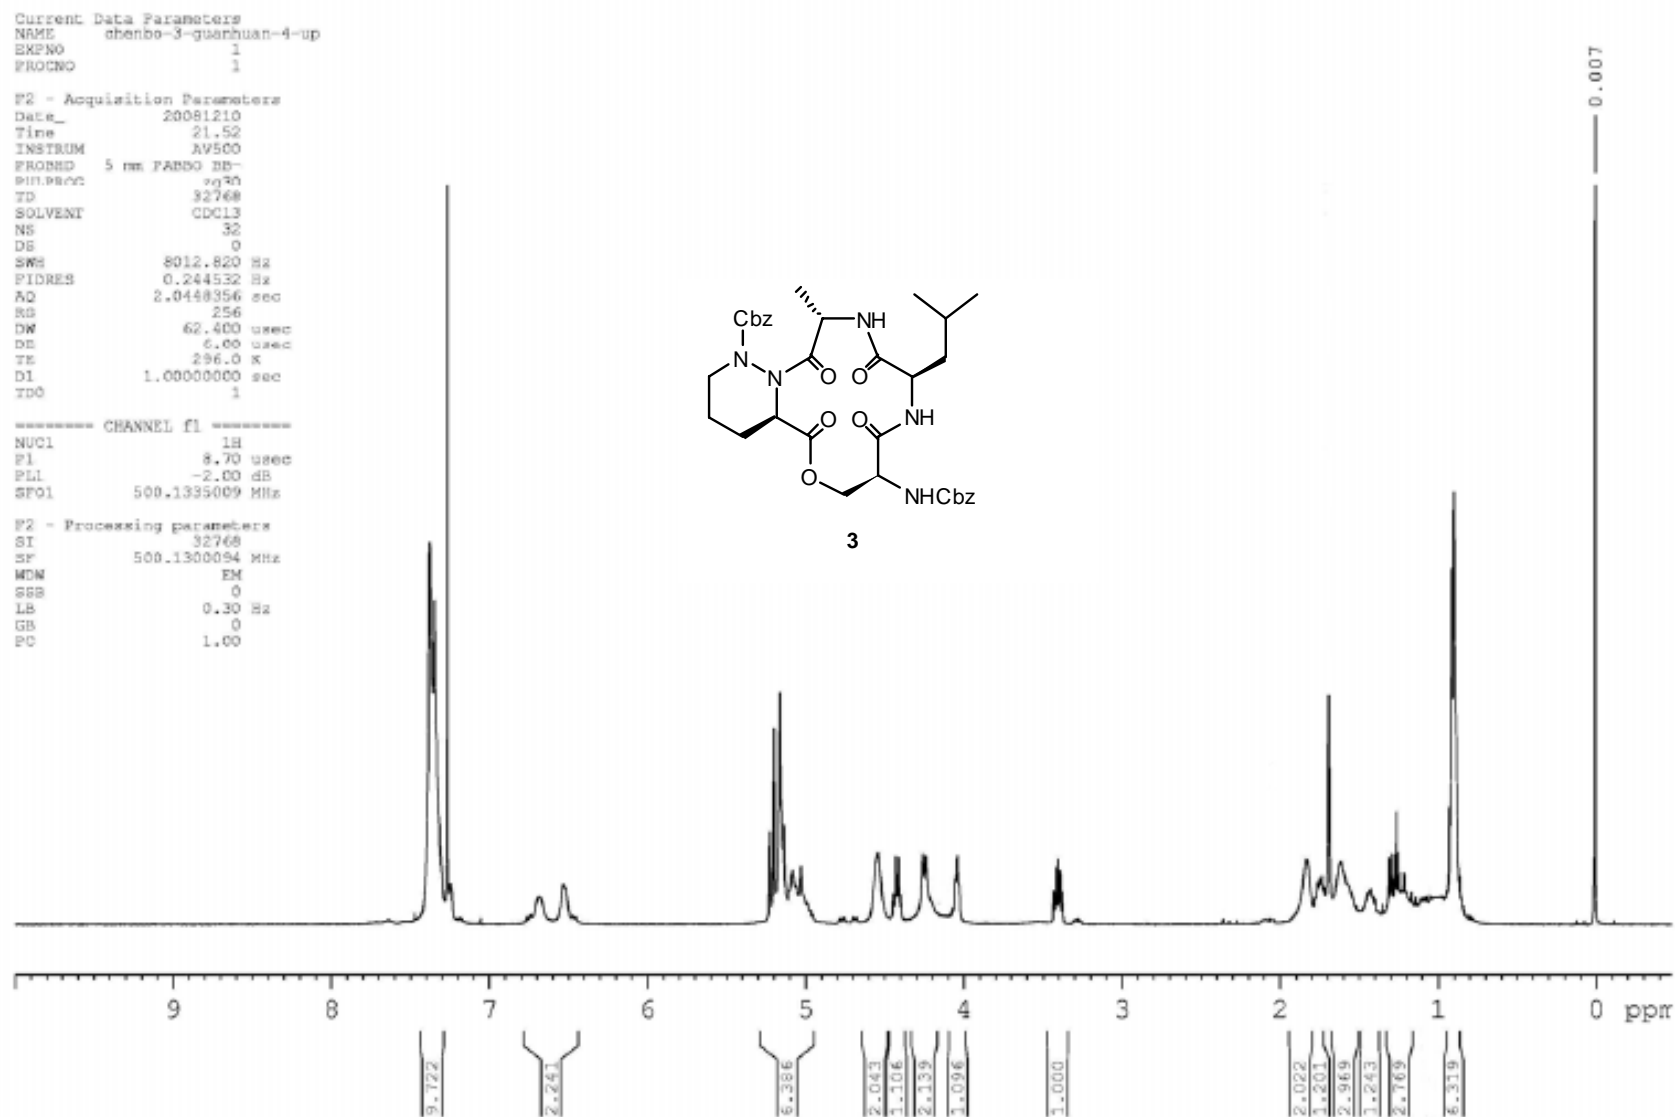

$^{13}\text{C}$  spectrum of **3**

Current Data Parameters  
NAME chenbo-3-Guanhuan-F  
EXPNO 2  
PROCNO 1

F2 - Acquisition Parameters  
Date\_ 20081205  
Time 21.22  
INSTRUM AVS00  
PROBHD 5 mm PABBO BB-  
PULPROG zgpg30  
TD 32768  
SOLVENT CDCl3  
NS 7436  
DS 0  
SWH 30030.029 Hz  
FIDRES 0.91644 Hz  
AQ 0.5456539 sec  
RG 362  
DW 16.650 usec  
DE 6.00 usec  
TE 301.2 K  
D1 1.0000000 sec  
d11 0.0300000 sec  
TD0 1

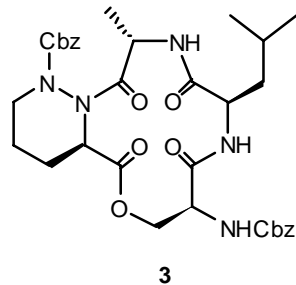

===== CHANNEL f1 =====  
NUC1 13C  
P1 7.00 usec  
PL1 0.00 dB  
SF01 125.7709936 MHz

===== CHANNEL f2 =====  
CPDPRG2 waltz16  
NUC2 1H  
PCPD2 80.00 usec  
PL2 2.00 dB  
PL12 17.50 dB  
SF02 500.1320005 MHz

F2 - Processing parameters  
SI 32768  
SF 125.7577645 MHz  
WDW EM  
SSB 0  
LB 1.00 Hz  
GB 0  
PC 1.40

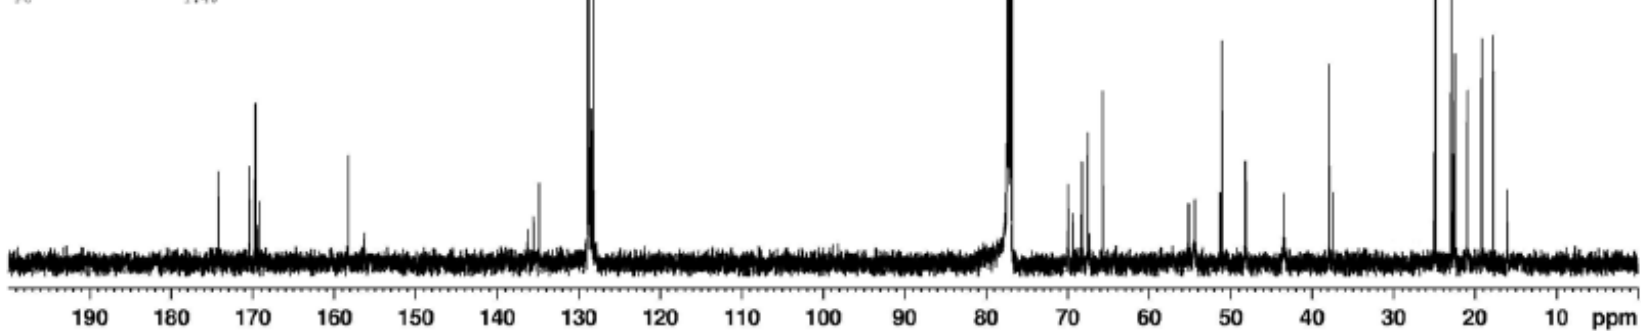

<sup>1</sup>H spectrum of 25S-13'

```

Current Data Parameters
NAME      chenbo08-5-21-3
EXPNO     1
PROCNO    1

F2 - Acquisition Parameters
Date_     20080521
Time      23.43
INSTRUM   AV500
PROBHD    5 mm F4BBO BB-
PULPROG   zg30
TD        32768
SOLVENT   CDCl3
NS         16
DS         0
SWH        8012.820 Hz
FIDRES     0.244532 Hz
AQ         2.0448356 sec
RG         40.3
DM         62.400 usec
DE         6.00 usec
TE         296.9 K
D1         1.00000000 sec
TD0        1

===== CHANNEL f1 =====
NUC1       1H
P1         8.70 usec
PL1        -2.00 dB
SFO1       500.135009 MHz

F2 - Processing parameters
SI         32768
SF         500.130071 MHz
WDW        EM
SSB        0
LB         0.30 Hz
GB         0
PC         1.00
  
```

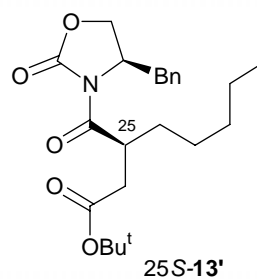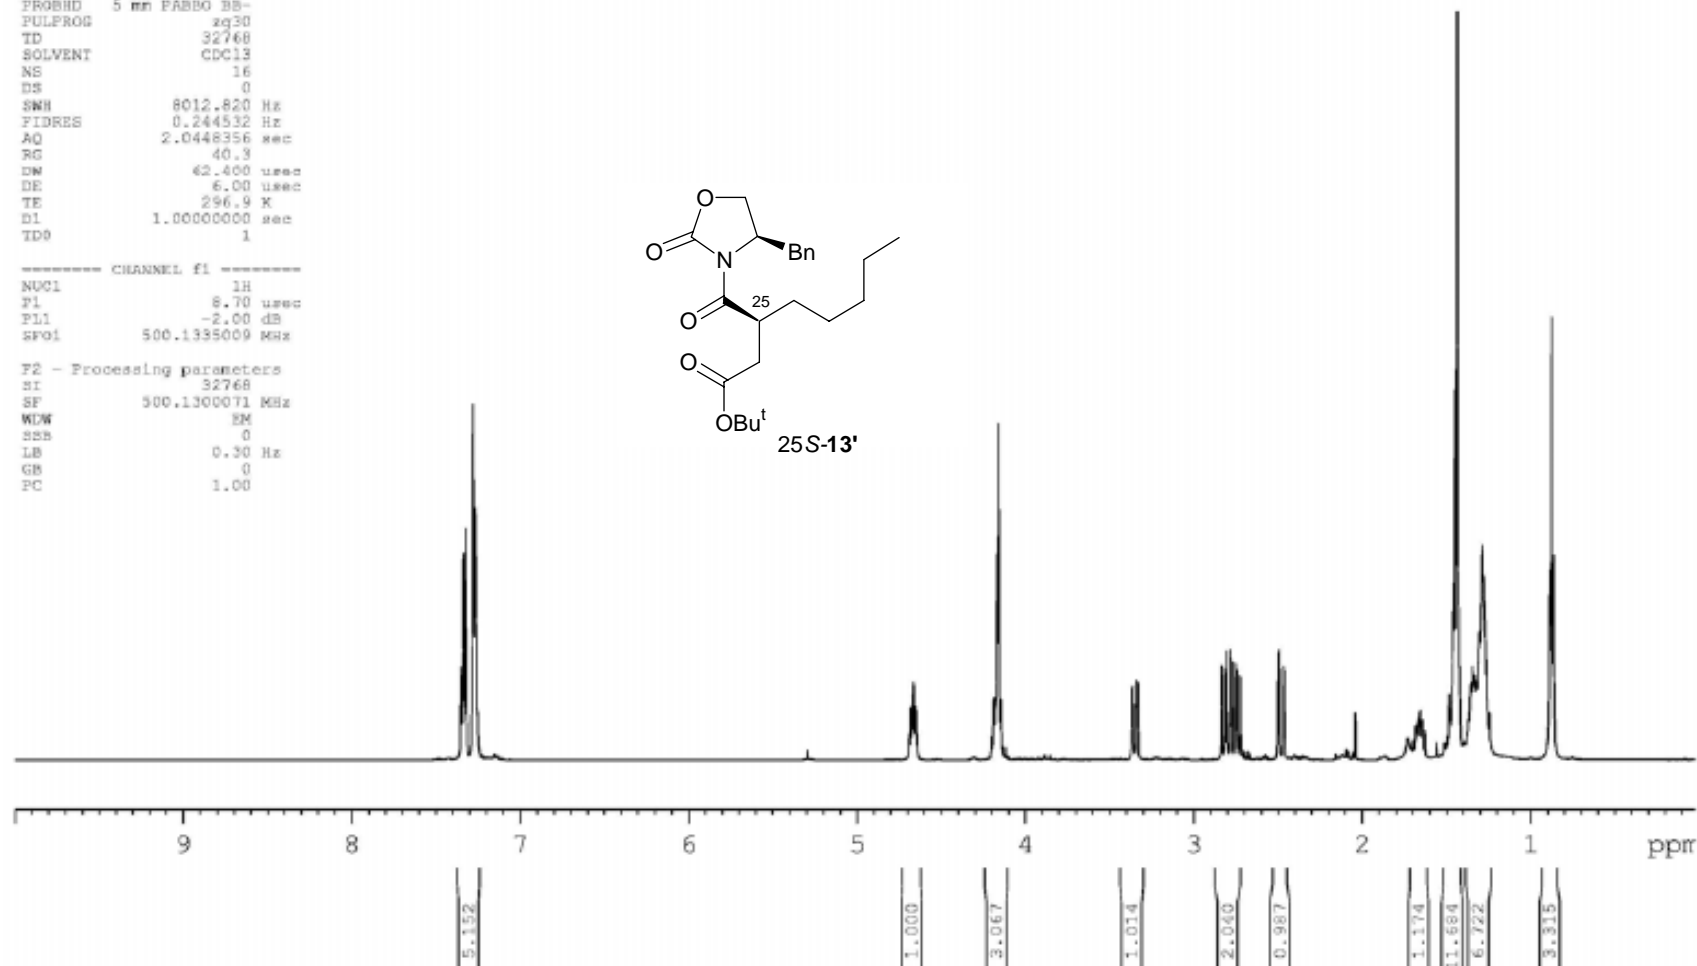

$^{13}\text{C}$  spectrum of 25S-13'

Current Data Parameters  
NAME chenbo08-5-21-3  
EXPNO 2  
PROCNO 1

F2 - Acquisition Parameters  
Date\_ 20080521  
Time 23.50  
INSTRUM AV500  
PROBHD 5 mm PABBO BB-  
PULPROG zgpg30  
TD 32768  
SOLVENT CDCl3  
NS 85  
DS 0  
SWH 30010.024 Hz  
FIDRES 0.916444 Hz  
AQ 0.5456539 sec  
RG 362  
DW 16.650 usec  
DE 6.00 usec  
TE 297.1 K  
D1 1.00000000 sec  
d11 0.03000000 sec  
TD0 1

===== CHANNEL f1 =====  
NUC1  $^{13}\text{C}$   
P1 7.00 usec  
PL1 0.00 dB  
SFO1 125.7703643 MHz

===== CHANNEL f2 =====  
CPDPRG2 waltz16  
NUC2  $^1\text{H}$   
PCPD2 80.00 usec  
PL2 -2.00 dB  
PL12 17.50 dB  
SFO2 500.1320005 MHz

F2 - Processing parameters  
SI 32768  
SF 125.7577950 MHz  
WDW EM  
SSB 0  
LB 1.00 Hz  
GB 0  
PC 1.40

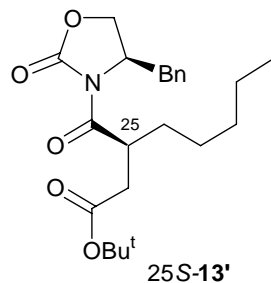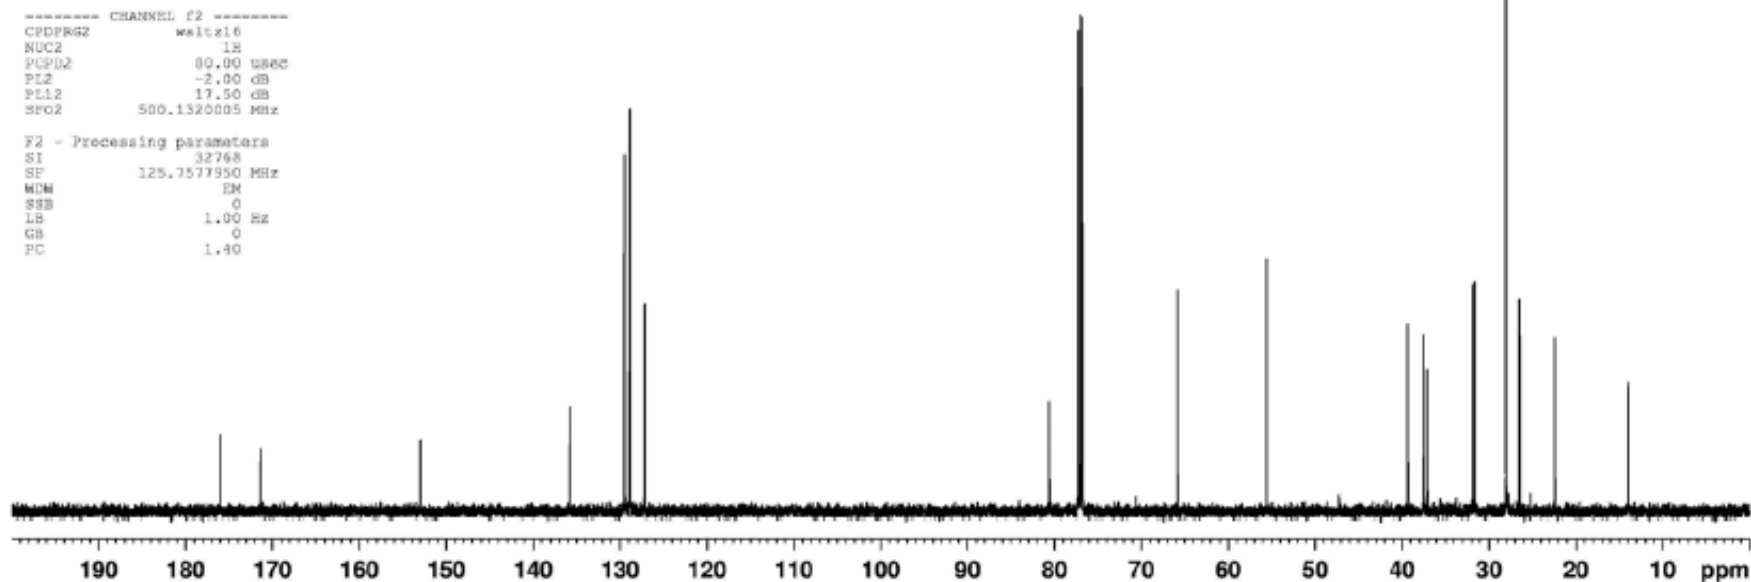

# <sup>1</sup>H spectrum of 25S-8

Current Data Parameters  
NAME chenbo00-5-21-2-allyl  
EXPNO 1  
PROCNO 1

F2 - Acquisition Parameters  
Date\_ 20080521  
Time 23.25  
INSTRUM AV500  
PROBHD 5 mm PABBO BB-  
PULPROG zg30  
TD 32768  
SOLVENT CDCl3  
NS 32  
DS 0  
SWH 8012.820 Hz  
FIDRES 0.244532 Hz  
AQ 2.0448356 sec  
RG 28.5  
DN 62.400 usec  
DE 6.00 usec  
TE 296.0 K  
D1 1.00000000 sec  
TD0 1

CHANNEL f1  
NUC1 1H  
P1 8.70 usec  
PL1 -2.00 dB  
SFO1 500.1335009 MHz

F2 - Processing parameters  
SI 32768  
SF 500.1300092 MHz  
WDW EM  
SSB 0  
LB 0.30 Hz  
GB 0  
PC 1.00

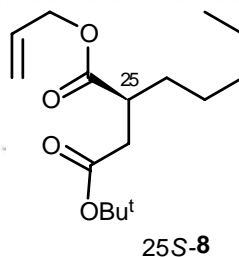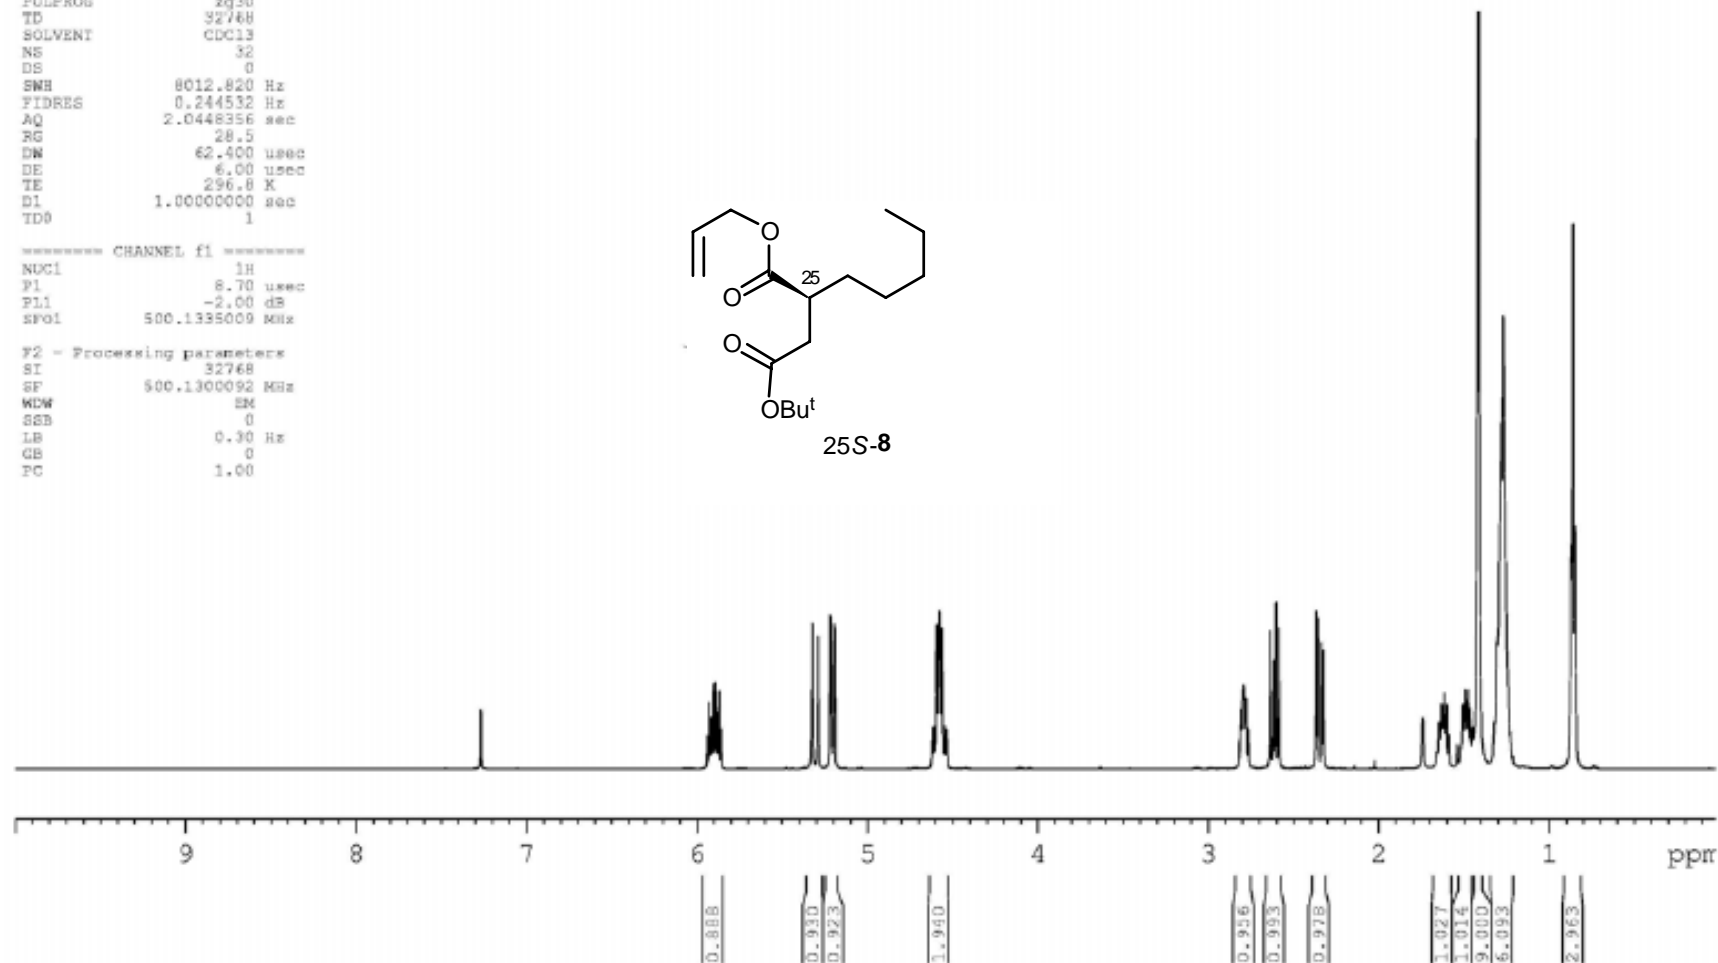

# <sup>13</sup>C spectrum of 25S-8

Current Data Parameters  
NAME chenbo08-S-21-8-allyl  
EXPNO 2  
PROCNO 1

F2 - Acquisition Parameters  
Date\_ 20080521  
Time 23.34  
INSTRUM AV500  
PROBHD 5 mm PABBO BB-  
PULPROG zgpg30  
TD 32768  
SOLVENT CDCl3  
NS 90  
DS 0  
SWH 30030.029 Hz  
FIDRES 0.916444 Hz  
AQ 0.5456539 sec  
RG 256  
DM 16.650 usec  
DE 6.00 usec  
TE 297.0 K  
D1 1.00000000 sec  
d11 0.03000000 sec  
TD0 1

===== CHANNEL f1 =====  
NUC1 13C  
P1 7.00 usec  
PL1 0.00 dB  
SFO1 125.7703643 MHz

===== CHANNEL f2 =====  
CPDPRG2 waltz16  
NUC2 1H  
PCPD2 80.00 usec  
PL2 -2.00 dB  
PL12 19.50 dB  
SFO2 500.1320005 MHz

F2 - Processing parameters  
SI 32768  
SF 125.7577917 MHz  
WDW EM  
SSB 0  
LB 1.00 Hz  
GB 0  
PC 1.40

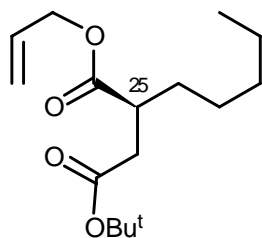

25S-8

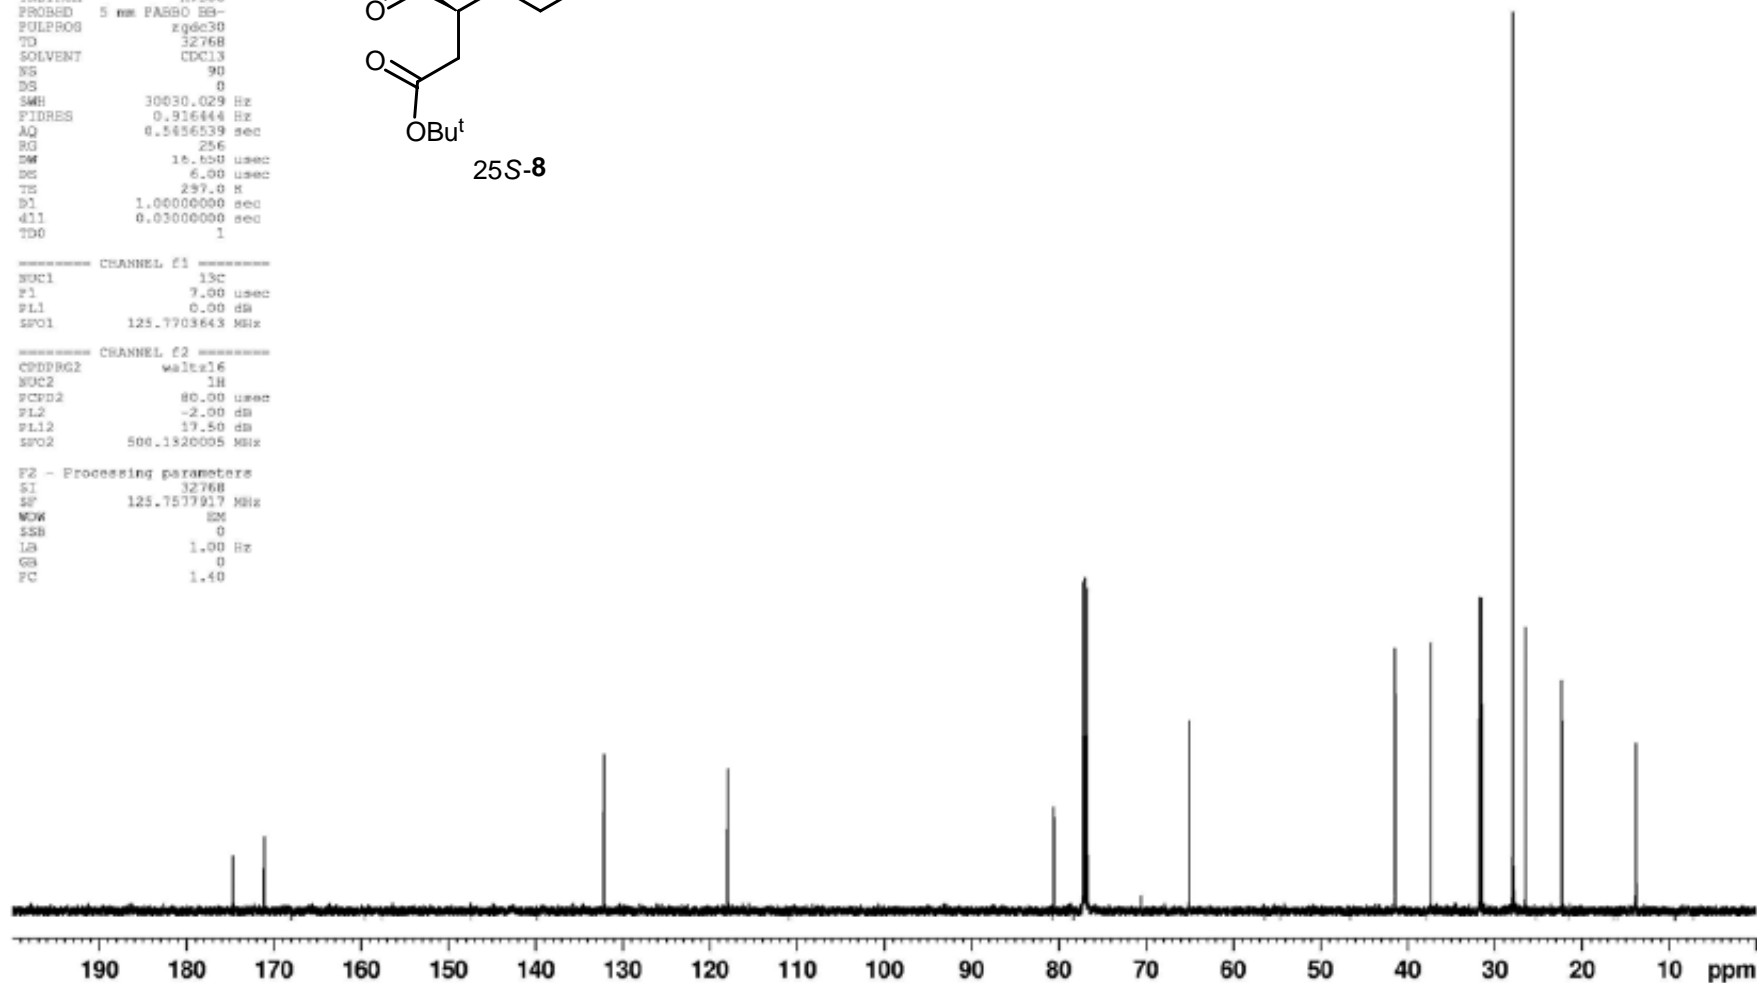

$^1\text{H}$  spectrum of 19S,25S-5

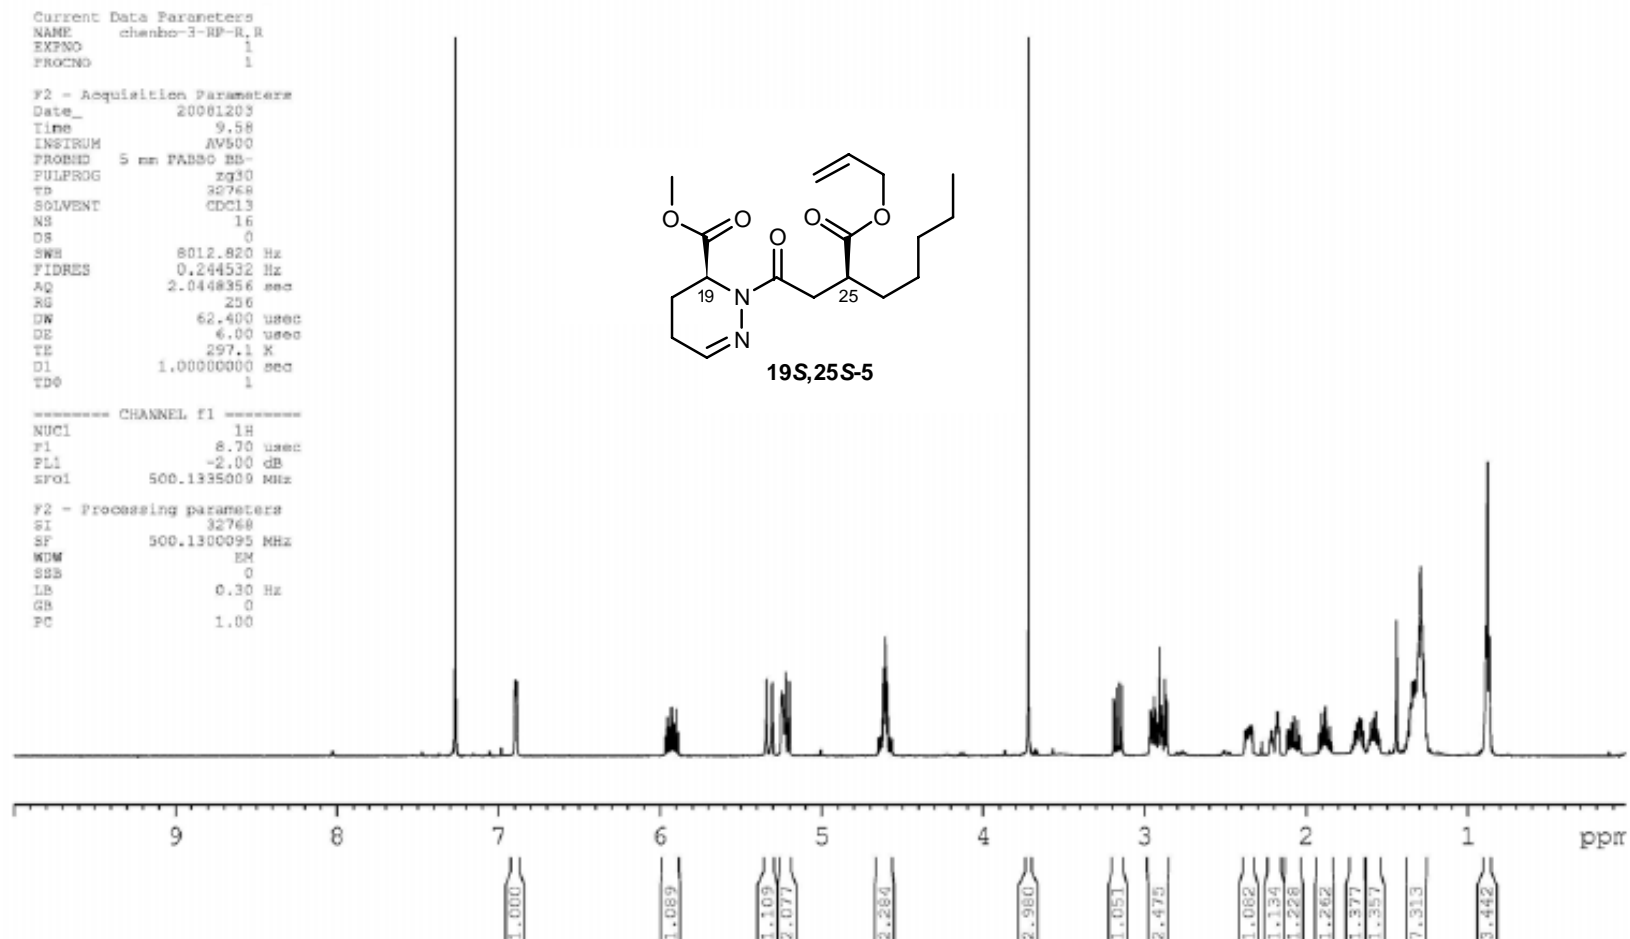

$^{13}\text{C}$  spectrum of 19*S*,25*S*-5

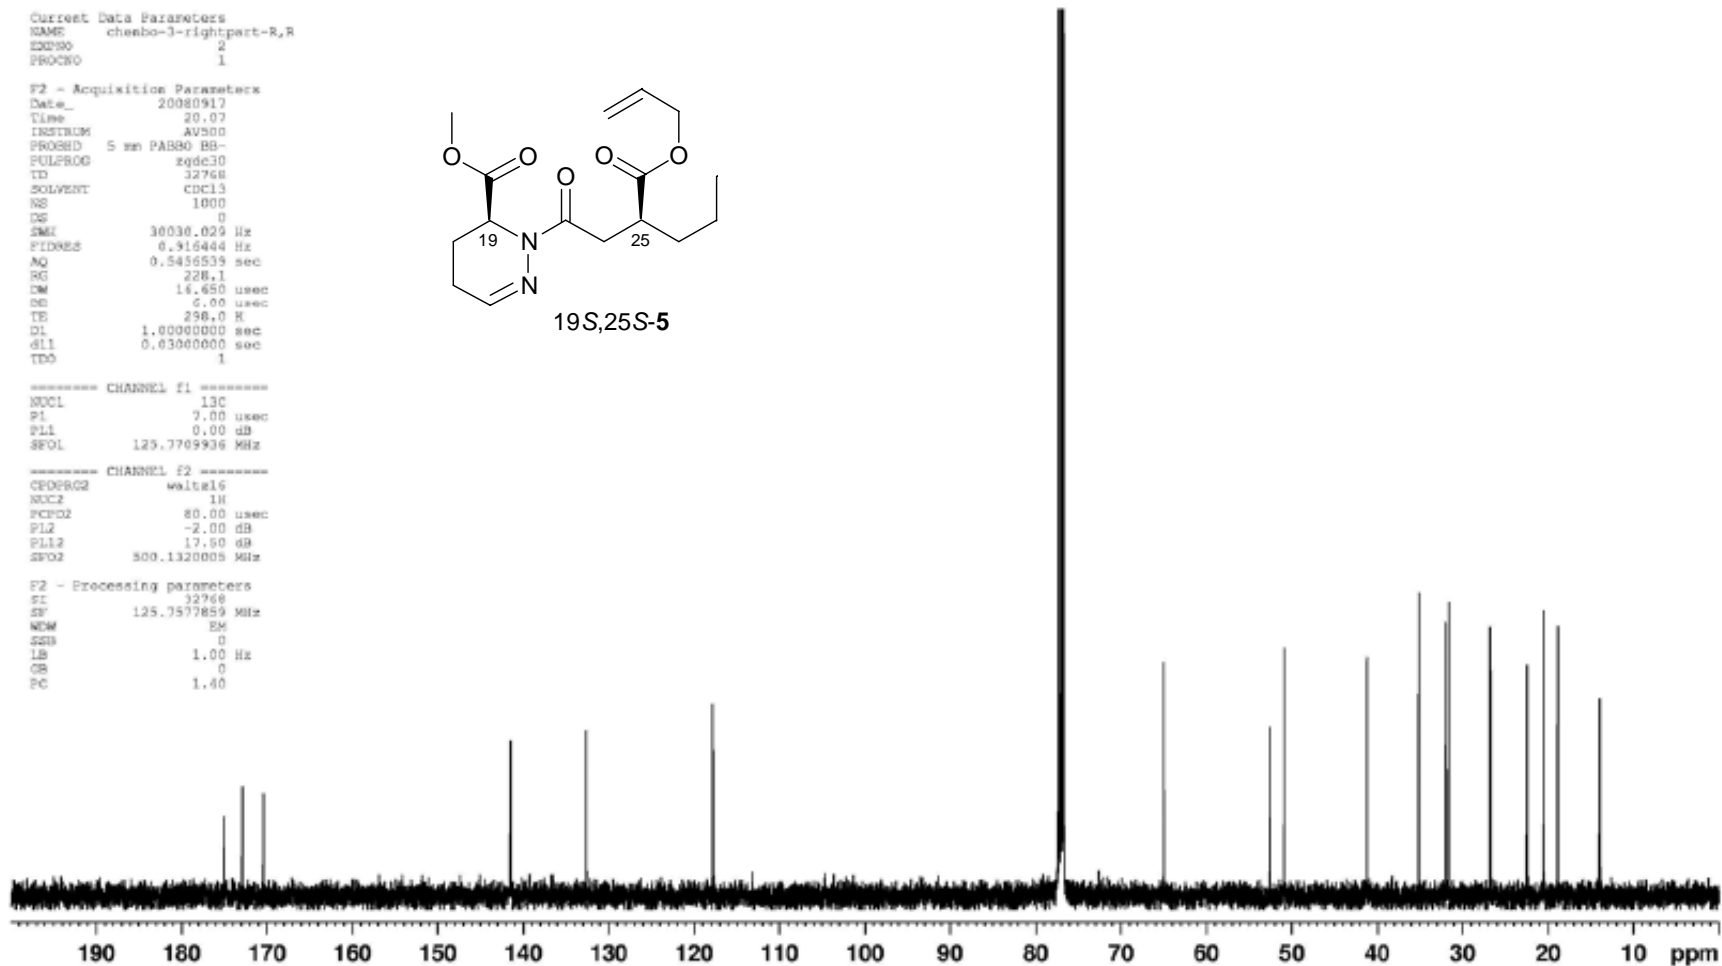

$^1\text{H}$  spectrum of 19*S*,25*R*-5a

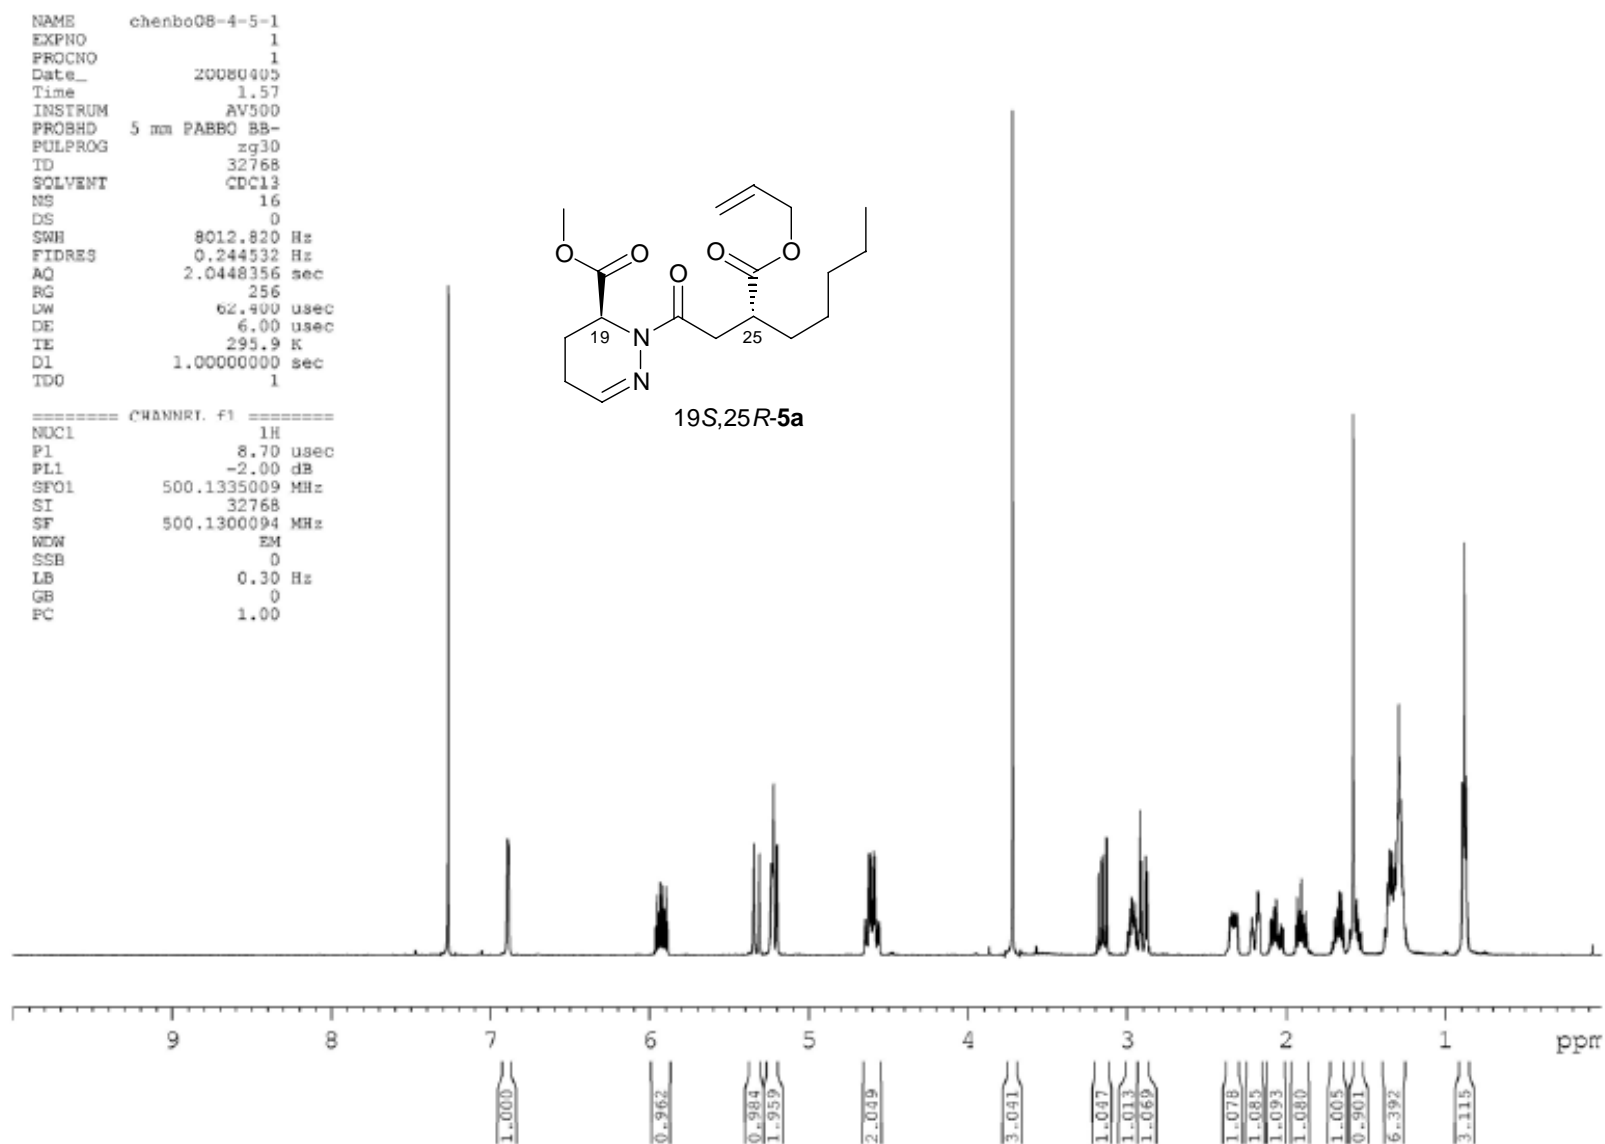

$^{13}\text{C}$  spectrum of 19*S*,25*R*-5a

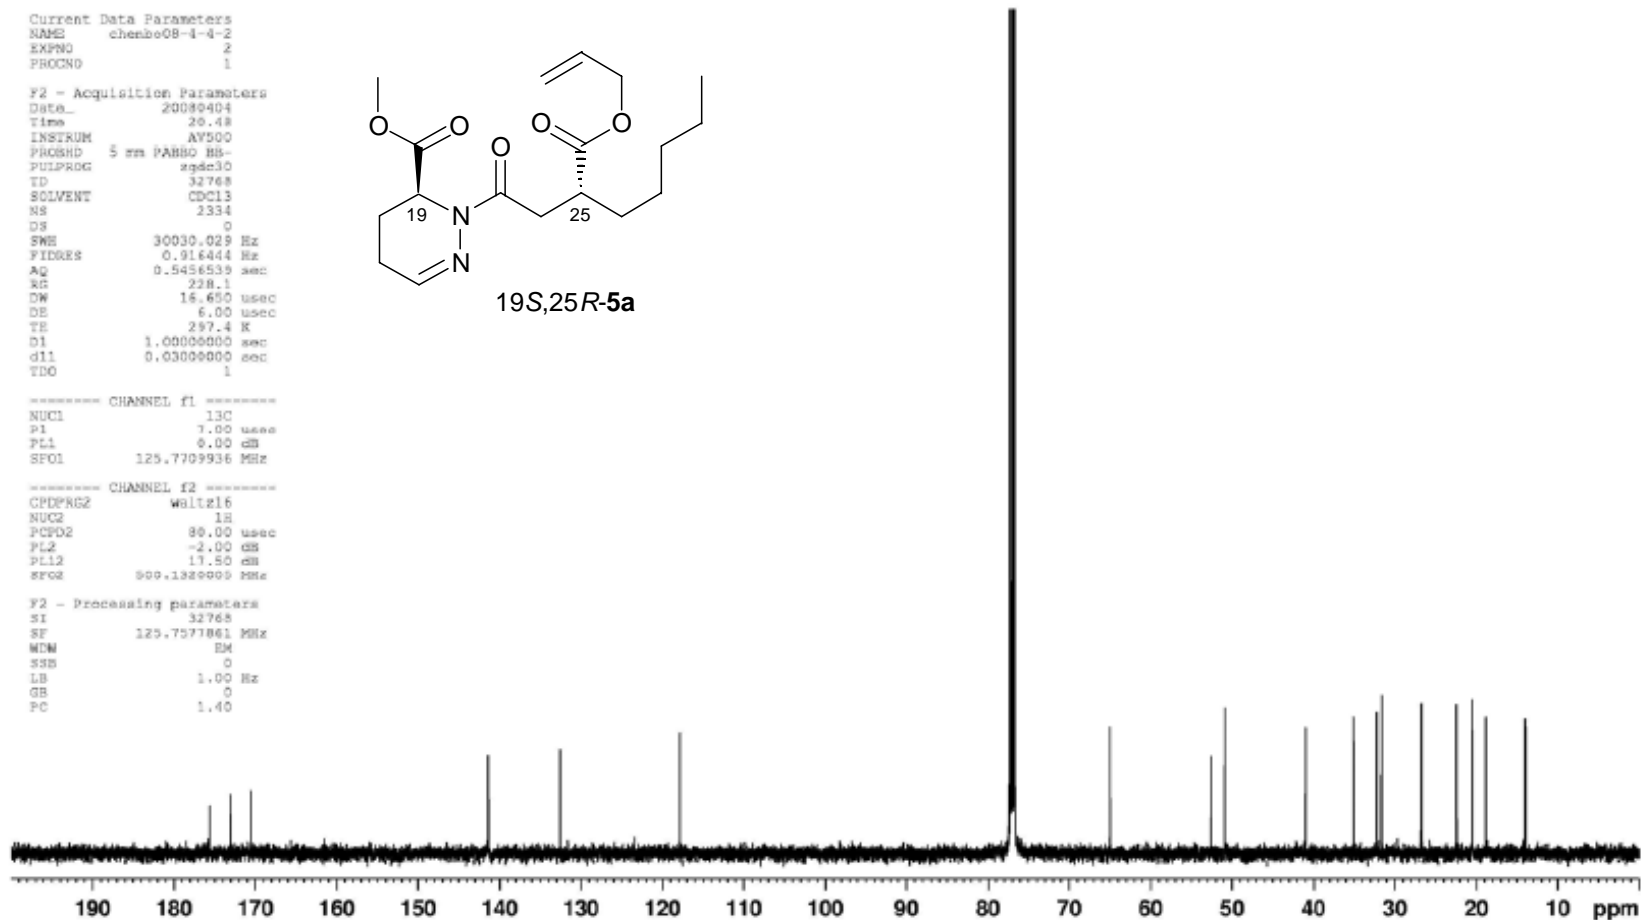

$^1\text{H}$  spectrum of **6'**

```

NAME      chenbo-3-S-tetrapeptide-COOMesOH
EXPNO     1
PROCNO    1
Date_     20090515
Time      20.39
INSTRUM   AV500
PROBHD    5 mm PABBO BB-
PULPROG   zg30
TD        32768
SOLVENT   CDCl3
NS        16
DS        0
SWH       8012.820 Hz
FIDRES    0.244532 Hz
AQ        2.0448356 sec
RG        101.6
DN        62.400 usec
DE        6.00 usec
TE        293.0 K
D1        1.00000000 sec
TD0       1
  
```

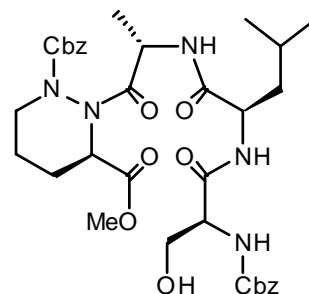

**6'**

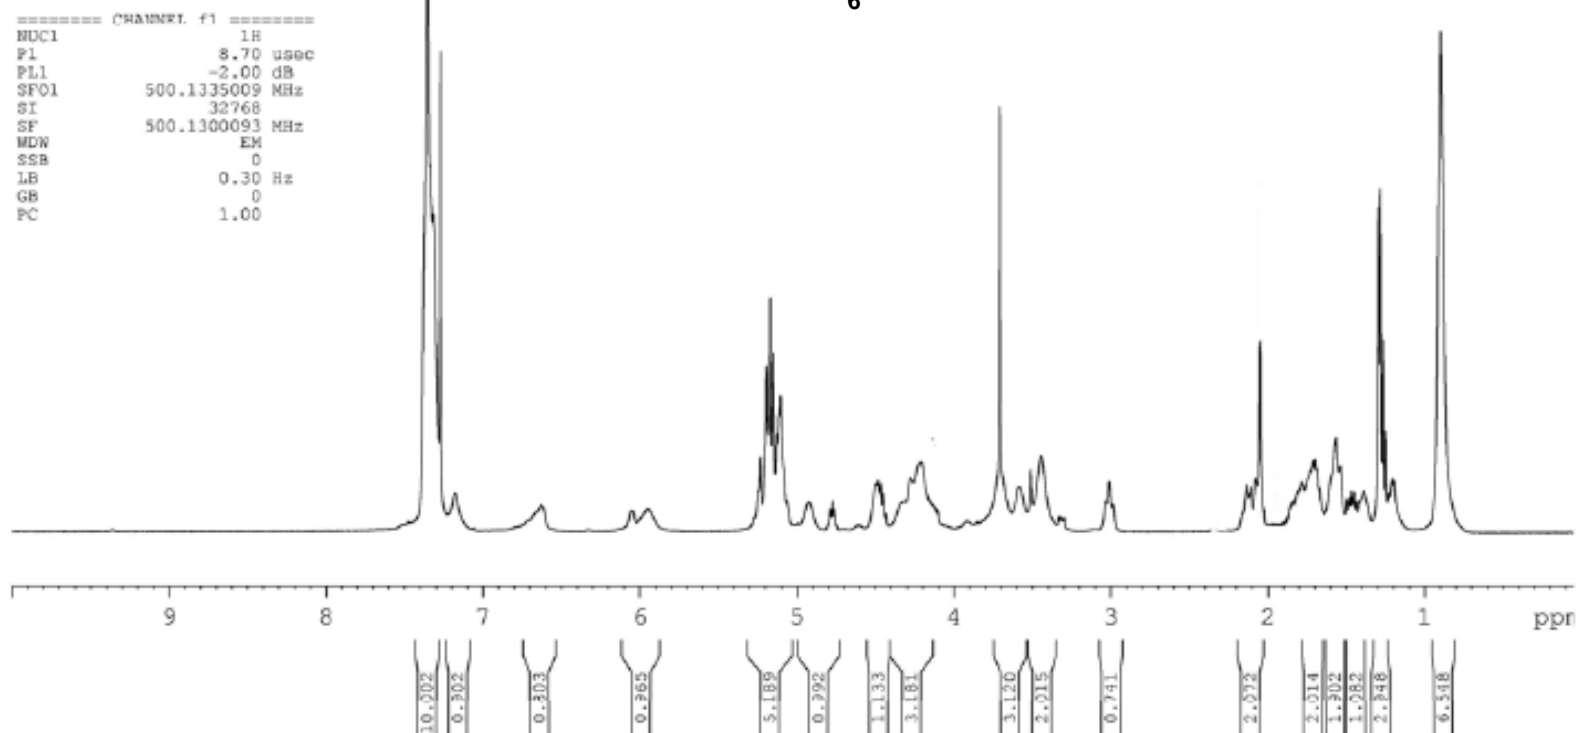

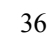

$^1\text{H}$  spectrum of 2*R*,7*S*,10*R*,16*S*,19*S*,25*S*-14

NAME chenbo-3-precursor/cyclization-0904;  
EXPNO 1  
PROCNO 1  
Date\_ 20090426  
Time 15.17  
INSTRUM AV500  
PROBHD 5 mm PABBO BB-  
PULPROG zg30  
TD 32768  
SOLVENT CDCl3  
NS 16  
DS 0  
SWH 8012.820 Hz  
FIDRES 0.244532 Hz  
AQ 2.0448356 sec  
RG 228.1  
DW 62.400 usec  
DE 6.00 usec  
TE 297.8 K  
D1 1.0000000 sec  
TD0 1

===== CHANNEL f1 =====  
NUC1 1H  
P1 8.70 usec  
PL1 -2.00 dB  
SFO1 500.1335009 MHz  
SI 32768  
SF 500.1300092 MHz  
WDW EM  
SSB 0  
LB 0.30 Hz  
GB 0  
PC 1.00

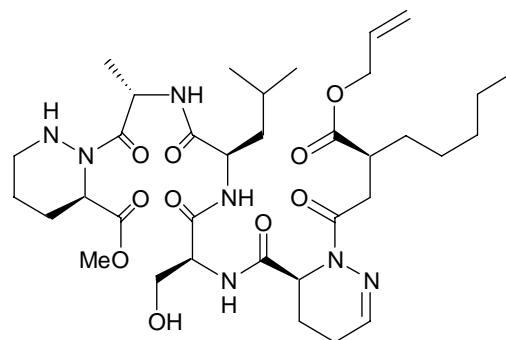

2*R*,7*S*,10*R*,16*S*,19*S*,25*S*-14

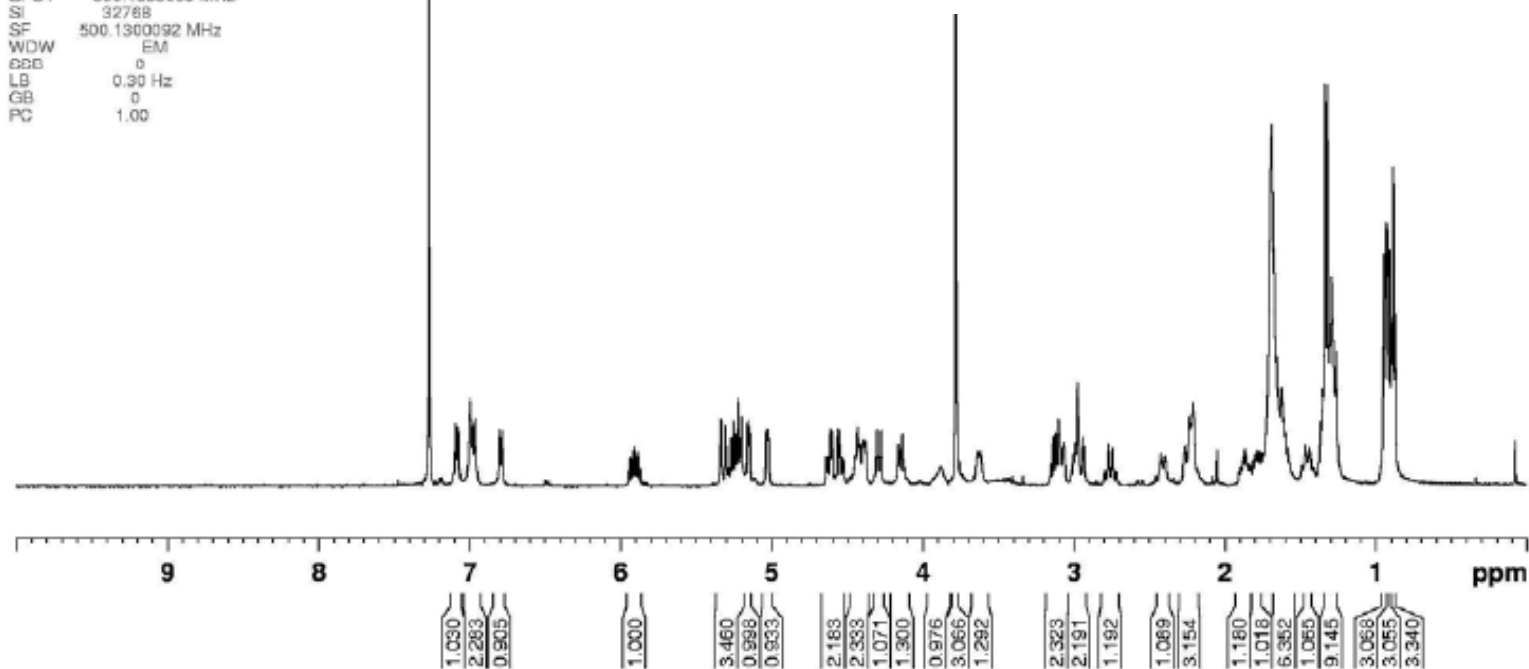

$^{13}\text{C}$  spectrum of 2*R*,7*S*,10*R*,16*S*,19*S*,25*S*-14

Current Data Parameters  
NAME chenke-3-precursorcyclization-190427  
EXPNO 2  
PROCNO 1

F2 - Acquisition Parameters

Date\_ 20090425  
Time 8.40  
INSTRUM spect  
PROBHD 5 mm PABUL 13C  
PULPROG zgpg30  
TD 32768  
SOLVENT CDCl3  
NS 13003  
DS 0  
SWH 18115.941 Hz  
FIDRES 0.552935 Hz  
AQ 0.9044468 sec  
RG 512  
DM 27.000 used  
DE 6.00 used  
TE 294.2 K  
D1 1.0000000 sec  
d11 0.0300000 sec  
TD0 1

===== CHANNEL F1 =====

NUC1 13C  
P1 9.90 used  
PL1 -1.10 dB  
SFO1 75.4756731 MHz

===== CHANNEL F2 =====

CPDPRG2 waltz16  
NUC2 1H  
PCPD2 80.00 used  
P12 0.00 dB  
PL12 15.80 dB  
SFO2 300.1312005 MHz

F2 - Processing parameters

SI 32768  
SF 75.4677310 MHz  
WDW EM  
SSB 0  
LB 1.00 Hz  
GB 0  
PC 1.40

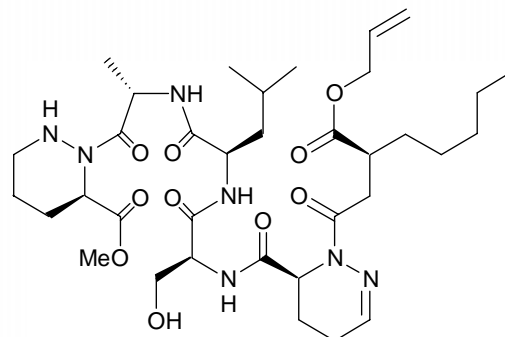

2*R*,7*S*,10*R*,16*S*,19*S*,25*S*-14

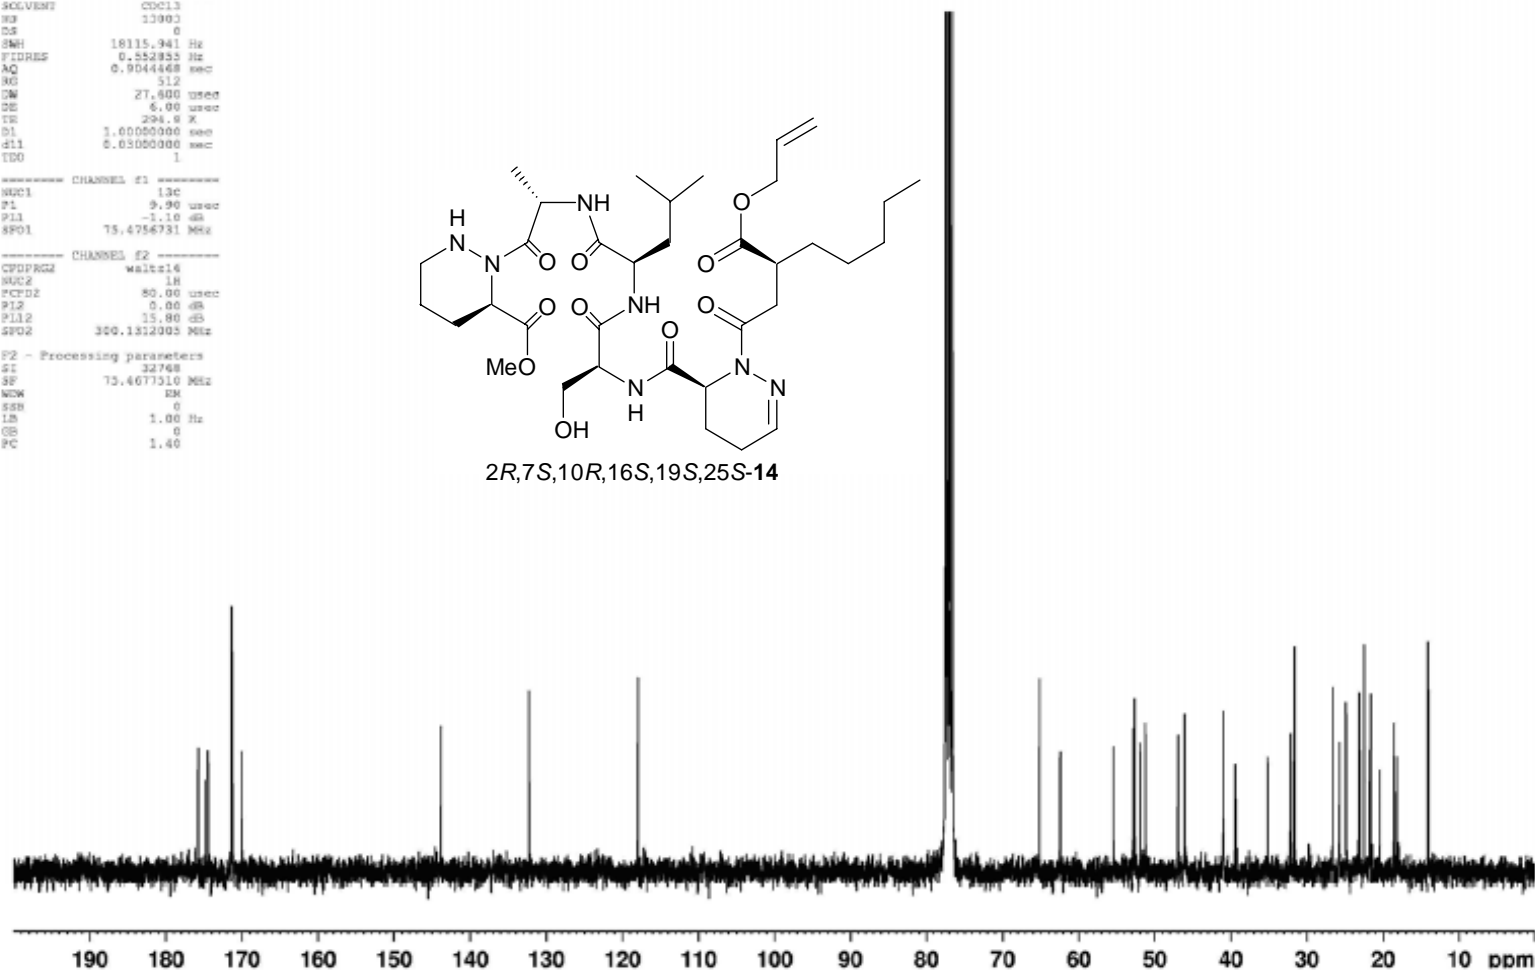

$^1\text{H}$  spectrum of **2*R*,7*S*,10*R*,16*S*,19*S*,25*S*-15**

NAME chenbo-3-final-allyl-S,S  
EXPNO 1  
PROCNO 1  
Date\_ 20081203  
Time 1.06  
INSTRUM AV500  
PROBHD 5 mm PA380 BB-  
PULPROG zg30  
TD 32768  
SOLVENT CDCl3  
NS 16  
DS 0  
SWH 8012.620 Hz  
FIDRES 0.244532 Hz  
AQ 2.0448356 sec  
RG 408.4  
DW 62.400 usec  
DE 6.00 usec  
TE 297.0 K  
D1 1.0000000 sec  
TD0 1

===== CHANNEL f1 =====  
NUC1  $^1\text{H}$   
P1 8.70 usec  
PL1 -2.00 dB  
SFO1 500.1335009 MHz  
SI 32768  
SF 500.1300096 MHz  
WDW EM  
GB 0  
LB 0.30 Hz  
GB 0  
PC 1.00

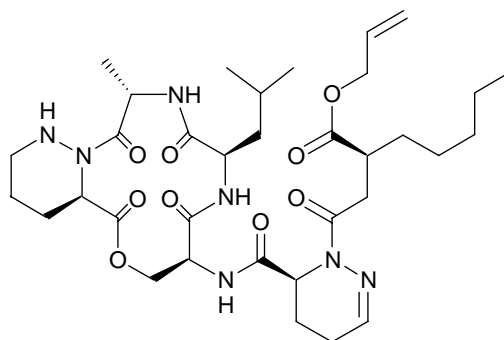

**2*R*,7*S*,10*R*,16*S*,19*S*,25*S*-15**

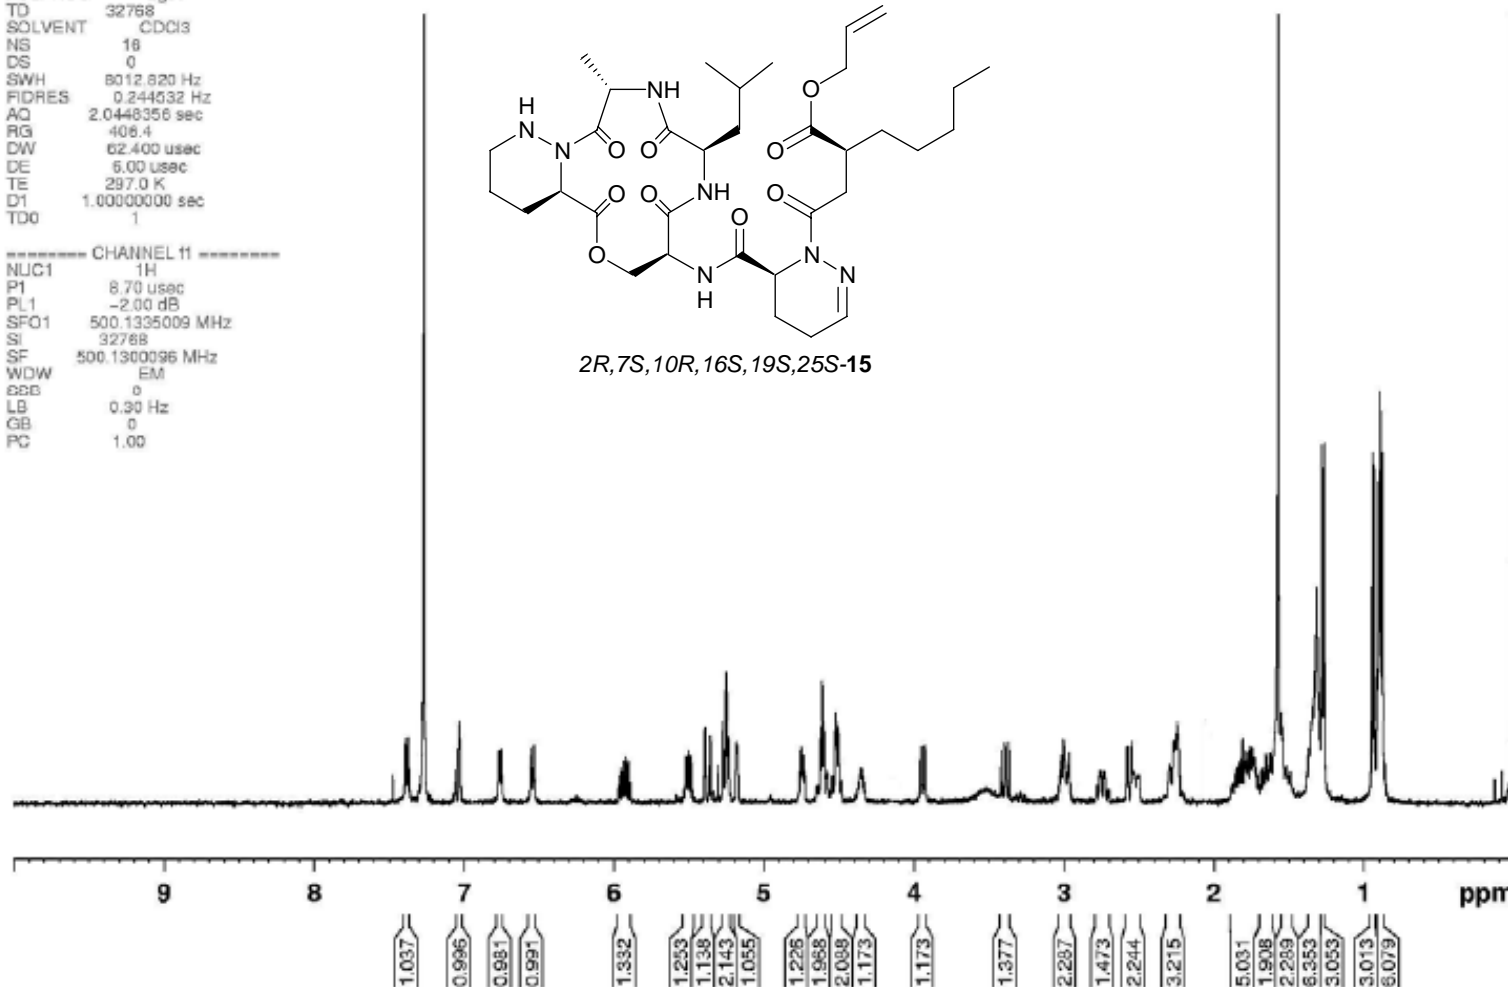

$^{13}\text{C}$  spectrum of **2R,7S,10R,16S,19S,25S-15**

Current Data Parameters  
NAME: cb-3-10-fina-allyl-5,6  
EXPNO: 7  
PROCNO: 1

F2 - Acquisition Parameters  
Date\_: 20080621  
Time: 9.25  
INSTRUM: AVS00  
PROBHD: 5 mm PABO BB-  
PULPROG: zgpg30  
TD: 32768  
SOLVENT: CDCl3  
NS: 19518  
DS: 0  
SMA: 30030.029 Hz  
FIDRES: 0.210444 Hz  
AQ: 0.5456539 sec  
RG: 143.7  
EM: 16.630 usec  
DE: 6.00 usec  
TE: 300.4 K  
D1: 1.0000000 sec  
d11: 0.0300000 sec  
TD0: 1

===== CHANNEL f1 =====  
NUC1:  $^{13}\text{C}$   
P1: 7.00 usec  
PL1: 0.00 dB  
SFO1: 125.7709936 MHz

===== CHANNEL f2 =====  
CPOPRG2: waltz16  
NUC2:  $^1\text{H}$   
PCPD2: 80.00 usec  
PL2: -2.00 dB  
PL12: 17.50 dB  
SFO2: 500.1320000 MHz

F2 - Processing parameters  
SI: 32768  
SF: 125.7577856 MHz  
MW: EM  
SSB: 0  
LB: 1.00 Hz  
GB: 0  
PC: 1.40

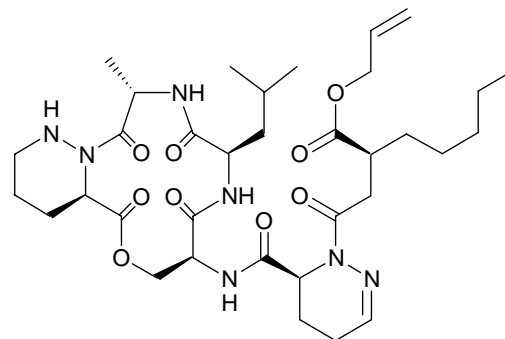

**2R,7S,10R,16S,19S,25S-15**

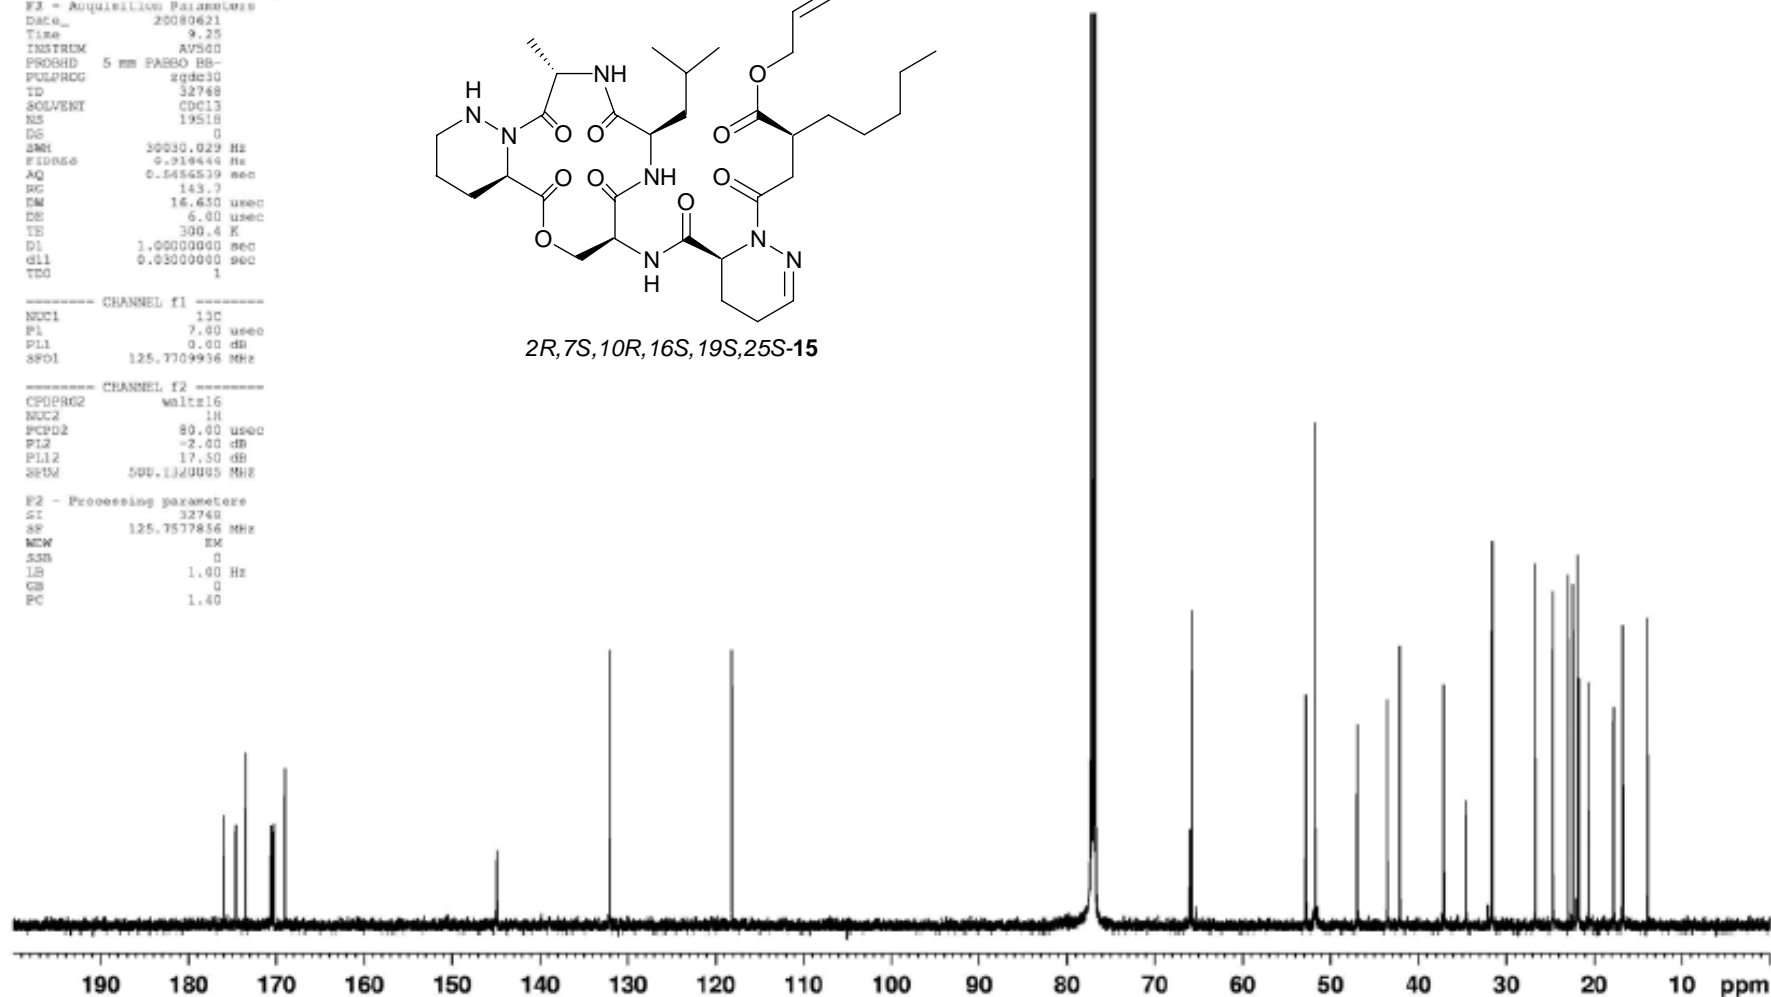

$^1\text{H}$  spectrum of *2R,7S,10R,16S,19S,25R-15a*

NAME chenbo-3-final-allyl-RSR-090421  
EXPNO 1  
PROCNO 1  
Date\_ 20090421  
Time 4.24  
INSTRUM AV500  
PROBHD 5 mm PASBO BB-  
PULPROG zg30  
TD 32768  
SOLVENT CDCl3  
NS 18  
DS 0  
SWH 8012.820 Hz  
FIDRES 0.244532 Hz  
AQ 2.0448356 sec  
RG 71.8  
DW 62.400 usec  
DE 6.00 usec  
TE 297.3 K  
D1 1.0000000 sec  
TD0 1

----- CHANNEL f1 -----  
NUC1  $^1\text{H}$   
P1 8.70 usec  
PL1 -2.00 dB  
SFO1 500.1335009 MHz  
SI 32768  
SF 500.1300094 MHz  
WDW EM  
SSB 0  
LB 0.30 Hz  
GB 0  
PC 1.00

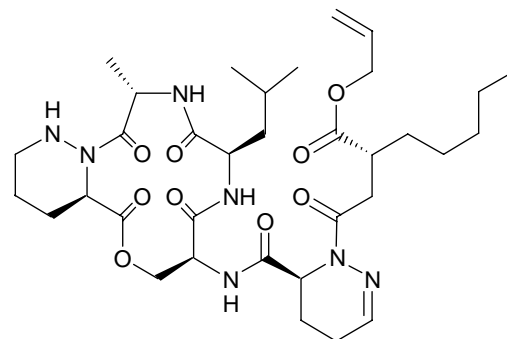

*2R,7S,10R,16S,19S,25R-15a*

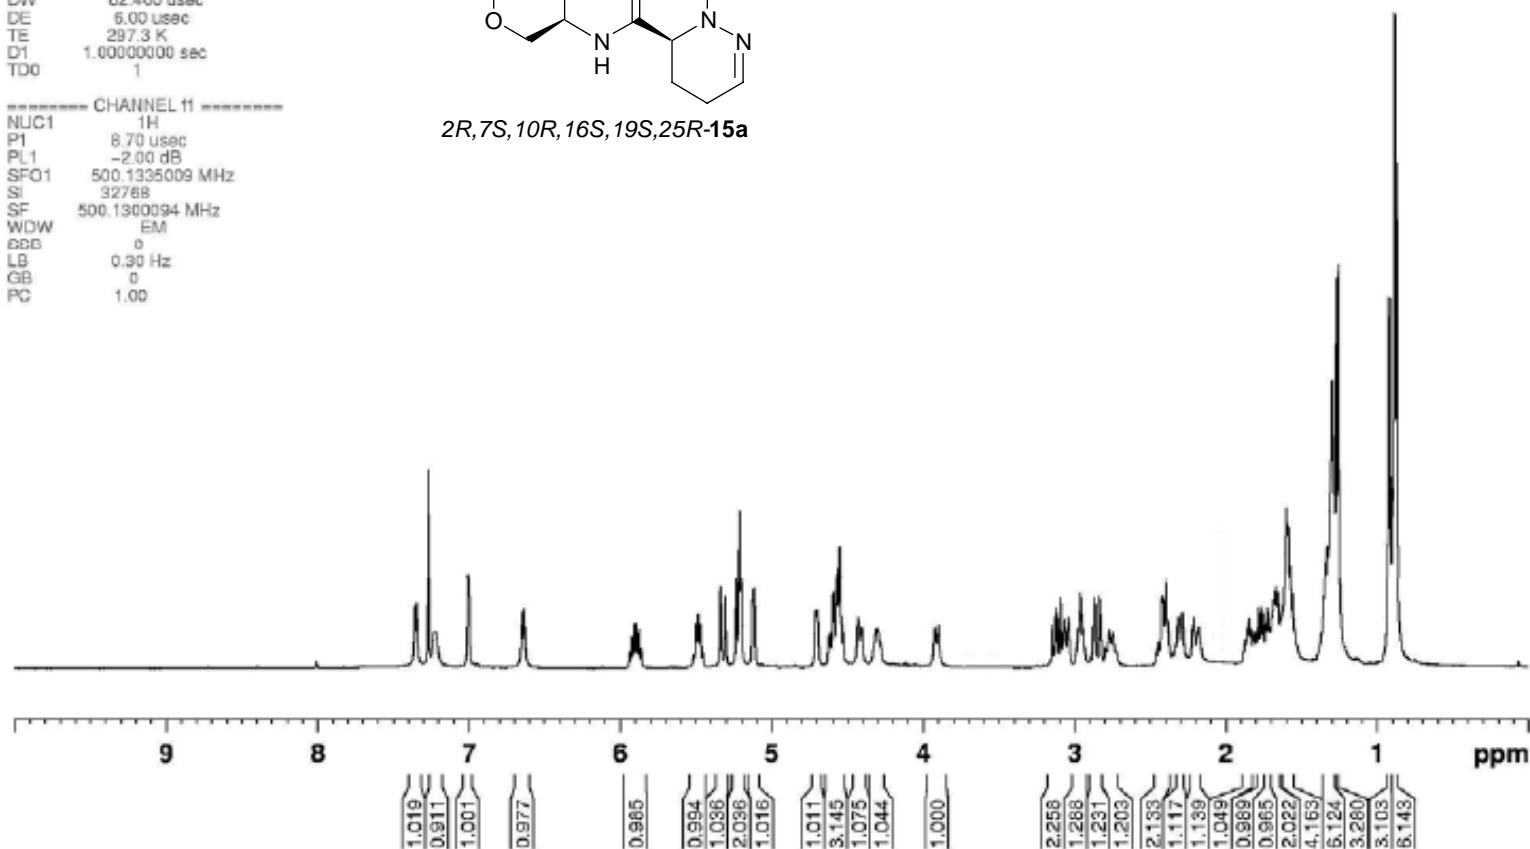

$^{13}\text{C}$  spectrum of 2*R*,7*S*,10*R*,16*S*,19*S*,25*R*-15a

```

Current Data Parameters*
NAME      chenbo3-xx-fis-al-lyl-G.W
EXPNO     2
PROCNO    1

F2 - Acquisition Parameters
Date_     20080905
Time      22.47
INSTRUM   AV500
PROBHD    5 mm PASSED 2D-
PULPROG   zgpg30
TD        32768
SOLVENT   CDCl3
NS        22740
DS        4
SWH       30030.029 Hz
FIDRES    0.916444 Hz
AQ        0.5456539 sec
RG         502
DW        16.650 usec
DE        6.00 usec
TE        300.2 K
D1        1.0000000 sec
d11       0.0300000 sec
TD0        1

===== CHANNEL f1 =====
NUC1       13C
P1         7.00 usec
PL1        0.00 dB
SFO1      125.770956 MHz

===== CHANNEL f2 =====
CPCPRG2    waltz16
NUC2       1H
PCPD2      80.00 usec
PL2        -2.00 dB
PL12       17.00 dB
SFO2      500.132005 MHz

F2 - Processing parameters
SI         32768
SF         125.7577443 MHz
WDW        EM
SSB        0
LB         1.00 Hz
GB         0
PC         1.40

```

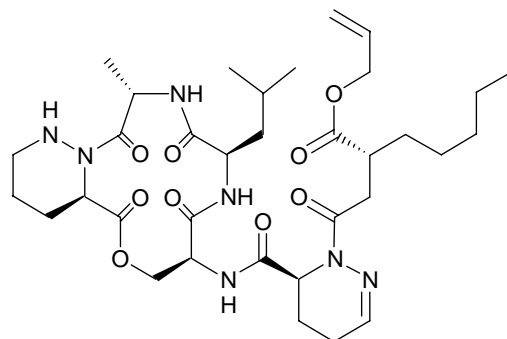

2*R*,7*S*,10*R*,16*S*,19*S*,25*R*-15a

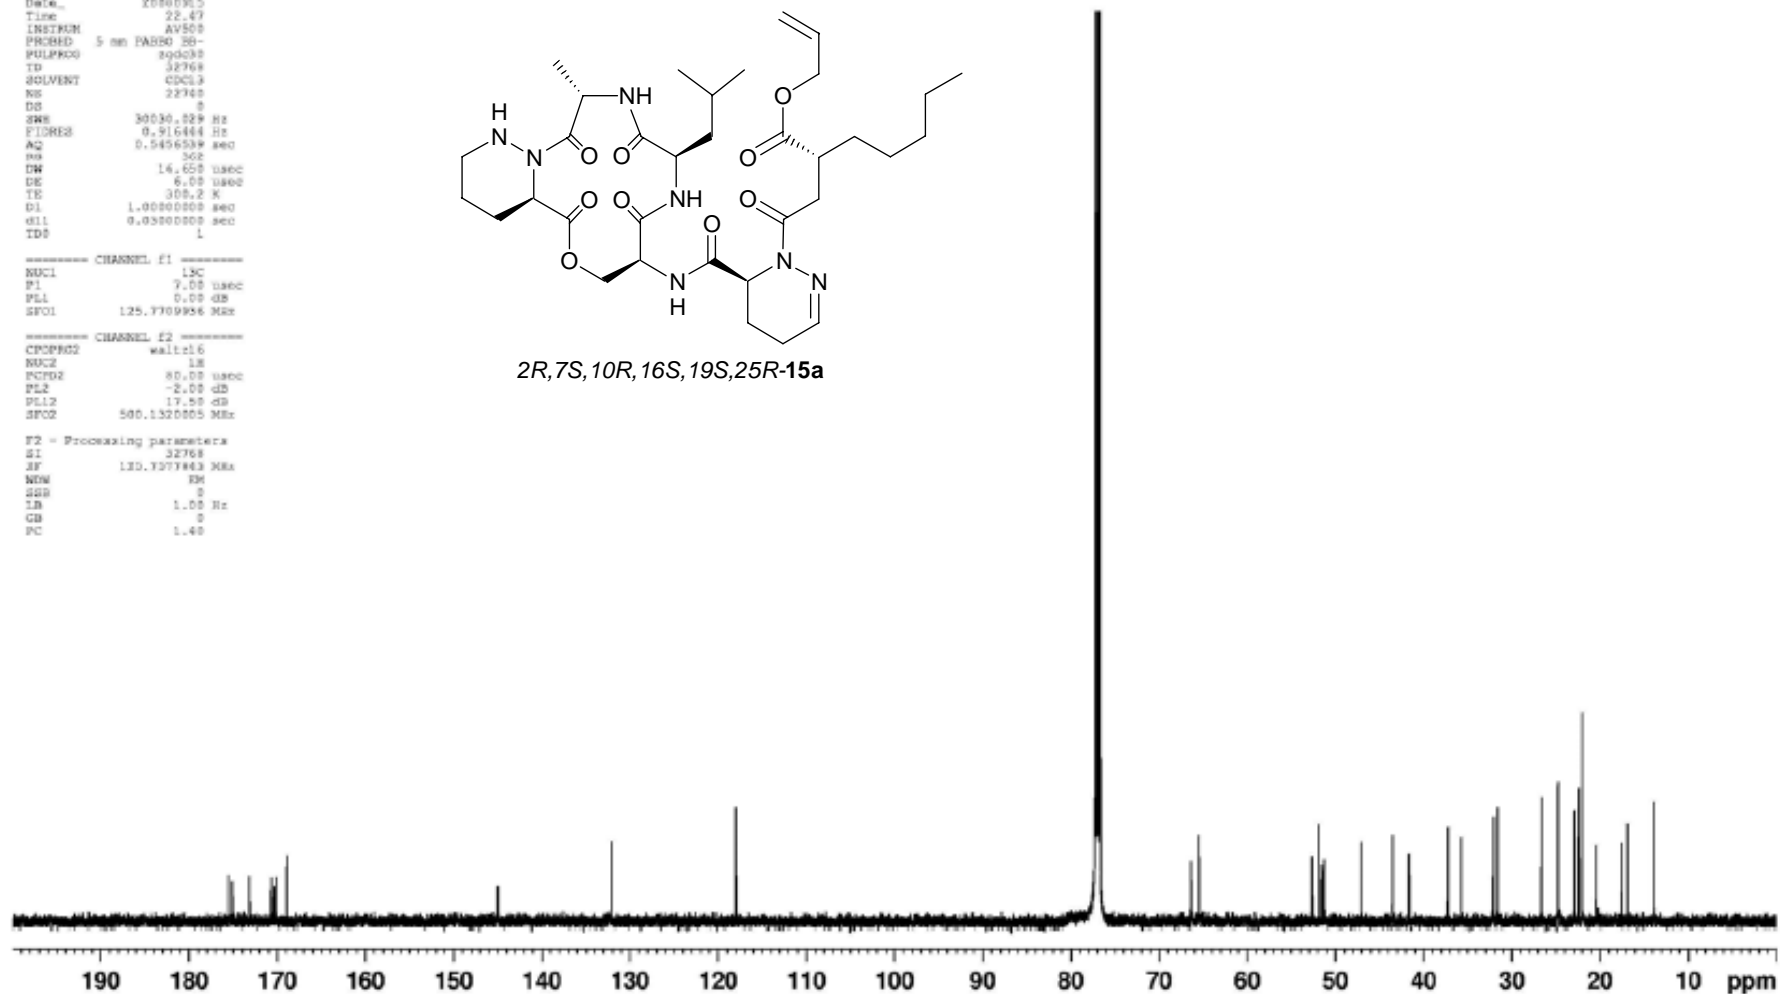

$^1\text{H}$  spectrum of 2*R*,7*S*,10*R*,16*S*,19*R*,25*S*-**15b**

NAME cb-3-12-final-allyl-R,S  
EXPNO 1  
PROCNO 1  
Date\_ 20080824  
Time 15.35  
INSTRUM AV500  
PROBHD 5 mm PASBO BB-  
PULPROG zg30  
TD 32768  
SOLVENT CDCl3  
NS 32  
DS 0  
SWH 8012.820 Hz  
FIDRES 0.244532 Hz  
AQ 2.0448356 sec  
RG 322.5  
DW 62.400 usec  
DE 6.00 usec  
TE 301.5 K  
D1 1.0000000 sec  
TD0 1

----- CHANNEL f1 -----  
NUC1  $^1\text{H}$   
P1 8.70 usec  
PL1 -2.00 dB  
SFO1 500.1335009 MHz  
SI 32768  
SF 500.1300095 MHz  
WDW EM  
SSB 0  
LB 0.30 Hz  
GB 0  
PC 1.00

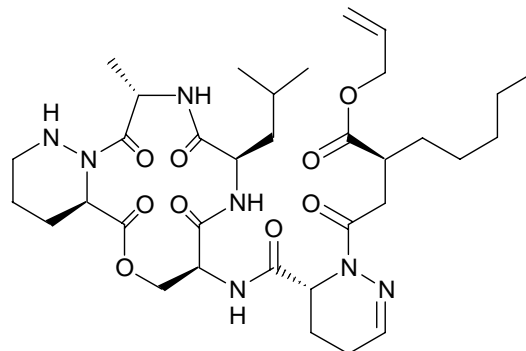

2*R*,7*S*,10*R*,16*S*,19*R*,25*S*-**15b**

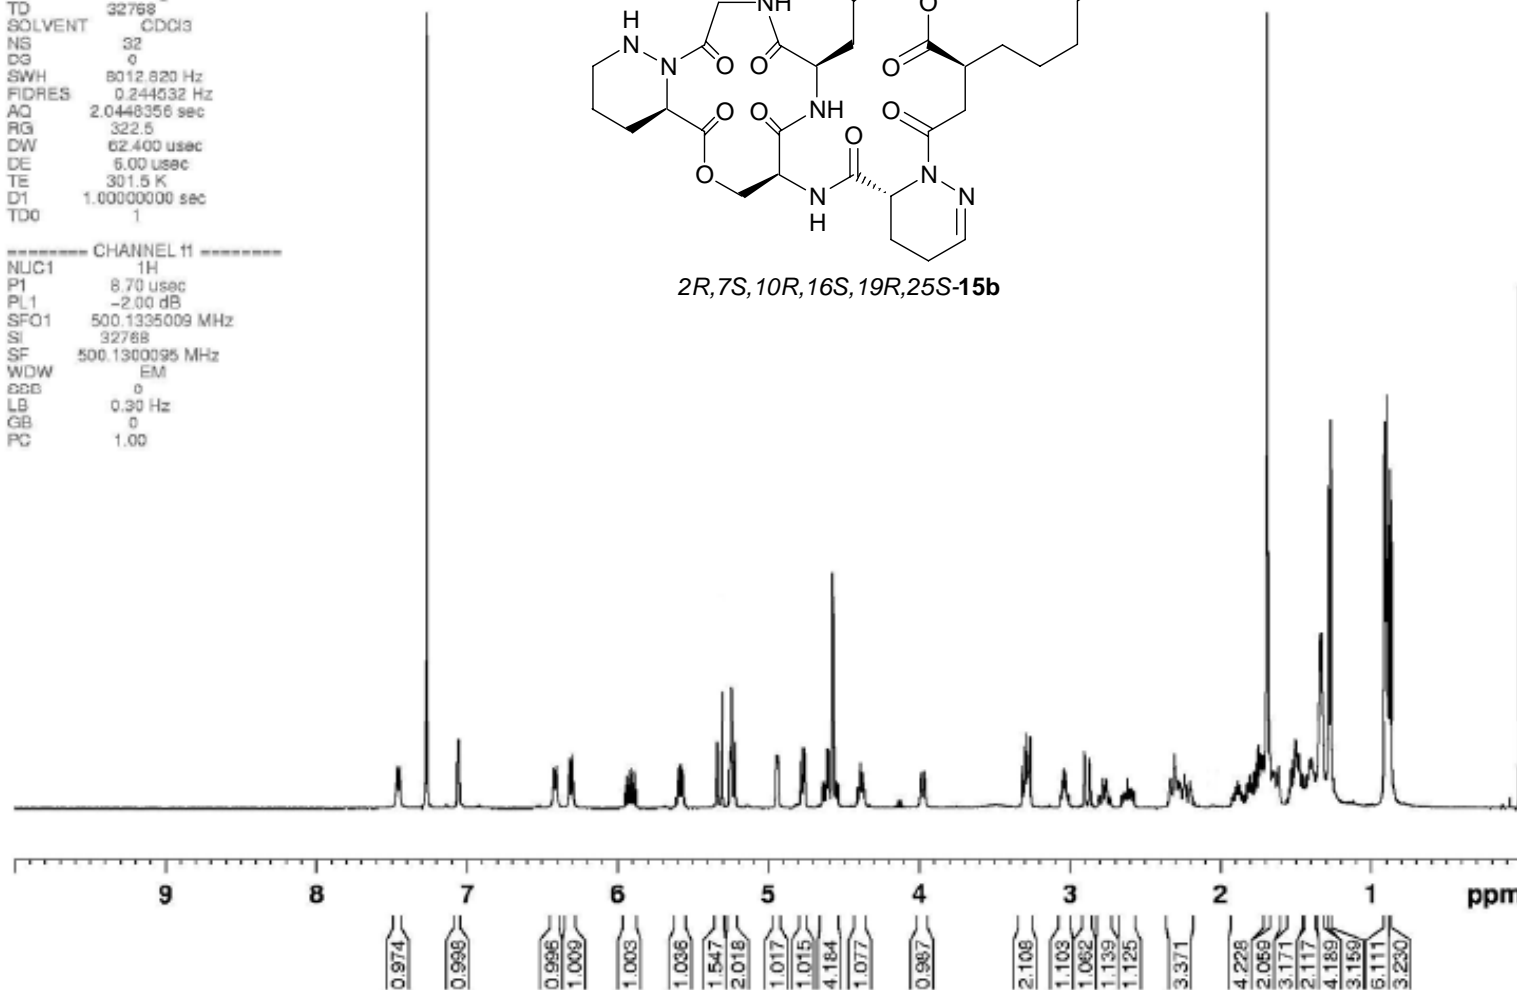

<sup>13</sup>C spectrum of 2*R*,7*S*,10*R*,16*S*,19*R*,25*S*-**15b**

Current Data Parameters  
NAME cd-3-12-final-allyl-4,5  
EXPNO 2  
PROCNO 1

F2 - Acquisition Parameters  
Date\_ 20080425  
Time 10.21  
INSTRUM AV500  
PROBHD 5 mm PABBO BB-  
PULPROG zgpg30  
TD 32768  
SOLVENT CDCl3  
NS 21712  
DS 0  
SWH 30030.029 Hz  
FIDRES 0.916444 Hz  
AQ 0.5436539 sec  
RG 128  
DW 16.650 usec  
DE 6.00 usec  
TE 302.6 K  
D1 1.00000000 sec  
d11 0.03000000 sec  
TD0 1

===== CHANNEL f1 =====  
NUC1 13C  
P1 7.00 usec  
PL1 0.00 dB  
SFO1 125.7709936 MHz

===== CHANNEL f2 =====  
CPDPRG2 waltz16  
NUC2 1H  
PCPD2 80.00 usec  
PL2 -2.00 dB  
PL12 17.50 dB  
SFO2 500.1320005 MHz

F2 - Processing parameters  
SI 32768  
SF 125.7577835 MHz  
WDW EM  
SSB 0  
LB 1.00 Hz  
GB 0  
PC 1.40

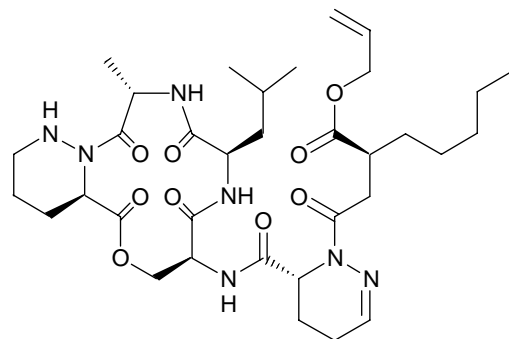

2*R*,7*S*,10*R*,16*S*,19*R*,25*S*-**15b**

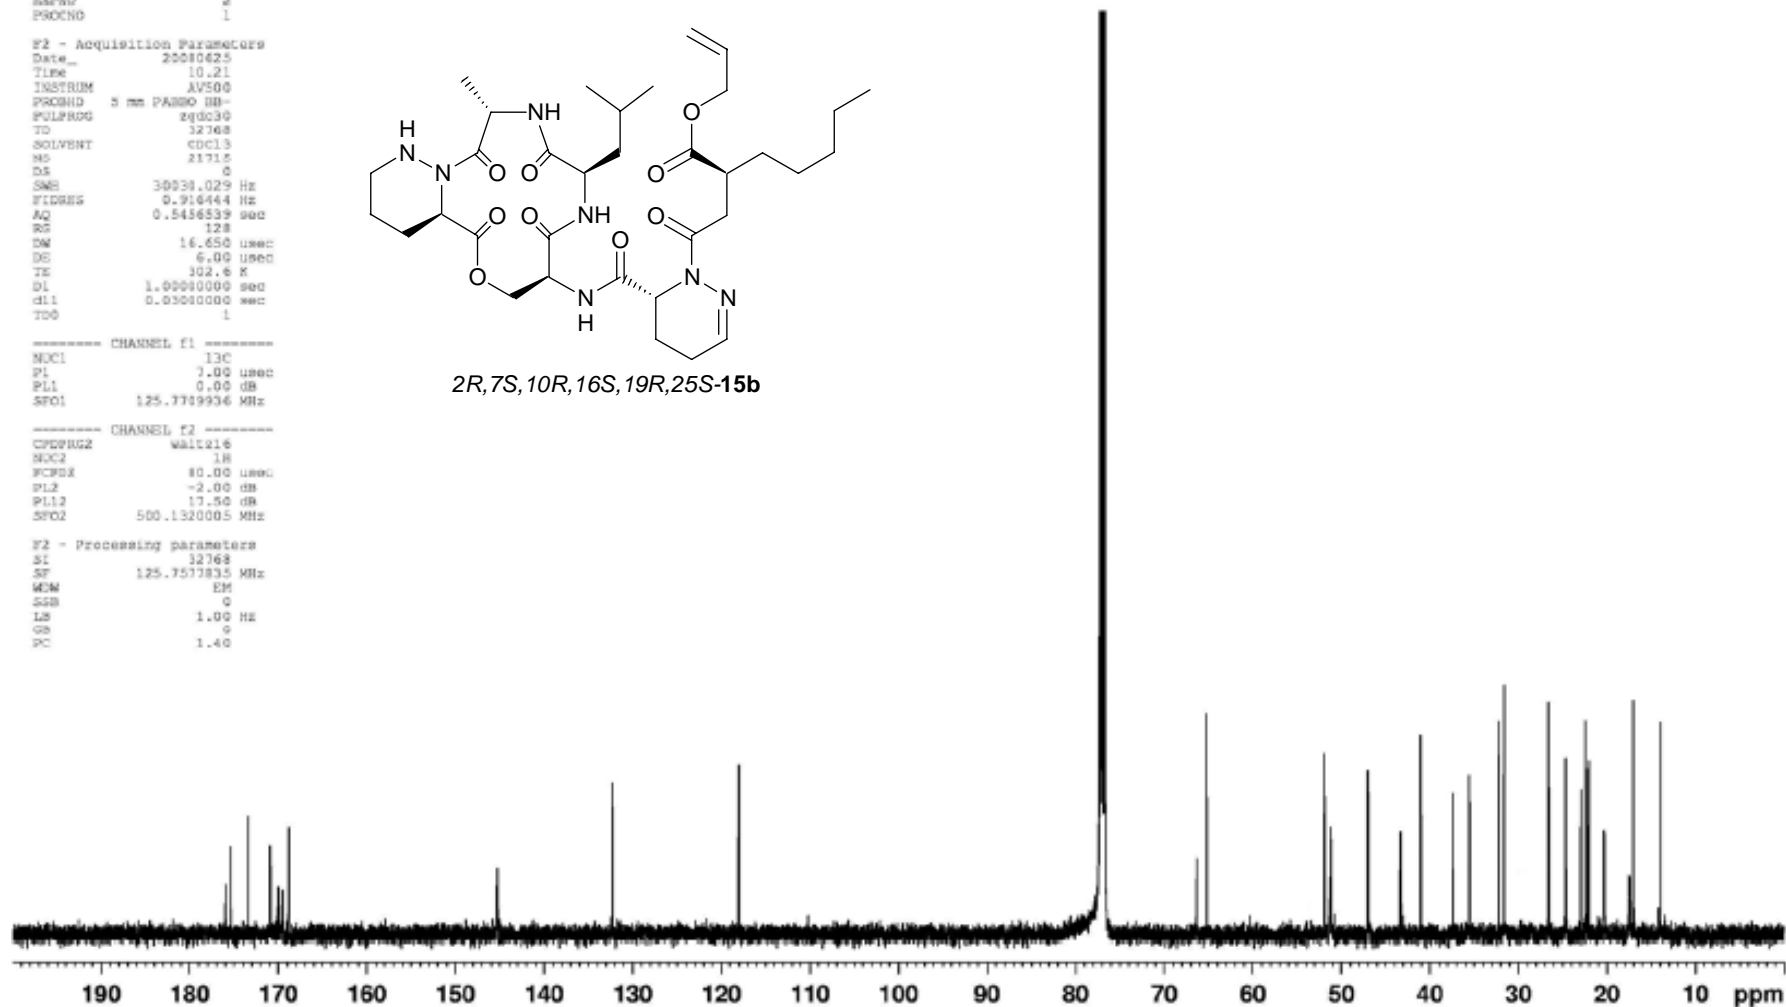

<sup>1</sup>H spectrum of 2*R*, 7*S*, 10*R*, 16*S*, 19*R*, 25*R*-15c

NAME chenbo-3-final-allyl-R,R  
EXPNO 1  
PROCNO 1  
Date\_ 20081208  
Time 0.47  
INSTRUM AV500  
PROBHD 5 mm PABBO BB-  
PULPROG zg30  
TD 32768  
SOLVENT CDCl3  
NS 16  
DS 0  
SWH 8012.820 Hz  
FIDRES 0.244532 Hz  
AQ 2.0448356 sec  
RG 101.6  
DW 62.400 usec  
DE 6.00 usec  
TE 295.6 K  
D1 1.0000000 sec  
TD0 1

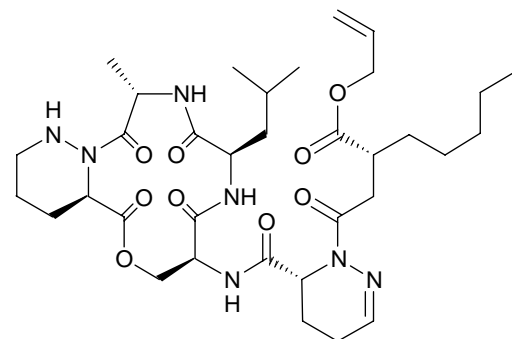

2*R*, 7*S*, 10*R*, 16*S*, 19*R*, 25*R*-15c

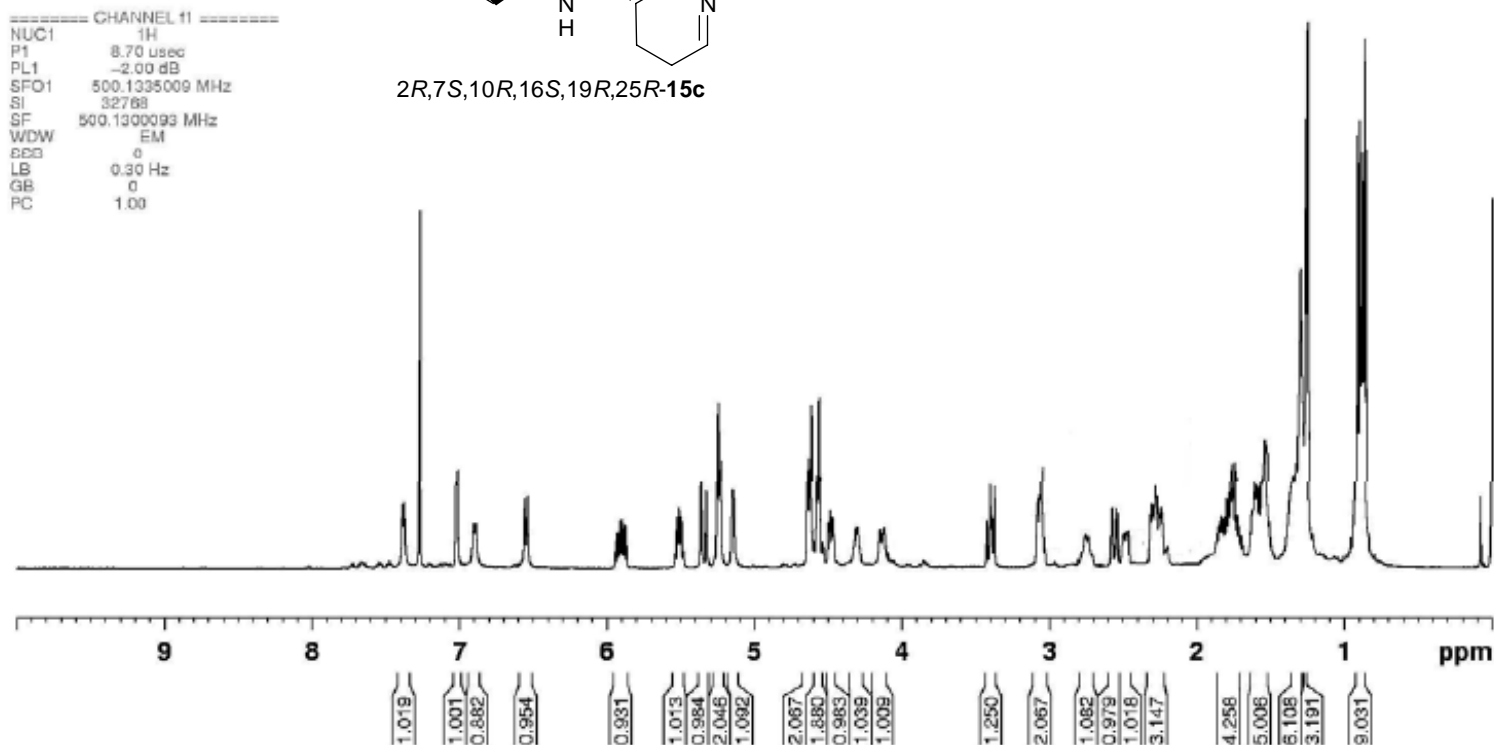

$^{13}\text{C}$  spectrum of *2R,7S,10R,16S,19R,25R-15c*

Current Data Parameters  
NAME chenbo-3-final-allyl-B,R  
EXPNO 2  
PROCNO 1

F2 - Acquisition Parameters

Date\_ 20091209  
Time 9.53  
INSTRUM AU500  
PROBHD 5 mm PABBO BB-  
PULPROG zgpg30  
TD 32768  
SOLVENT CDCl3  
NS 1057  
DS 0  
SWH 30030.629 Hz  
FIDRES 0.316444 Hz  
AQ 0.5456539 sec  
RG 362  
DM 16.450 usec  
DE 6.00 usec  
TE 298.2 K  
D1 1.0000000 sec  
d11 0.0300000 sec  
TD0 1

===== CHANNEL f1 =====

NUC1  $^{13}\text{C}$   
P1 7.00 usec  
PL1 0.00 dB  
SFO1 125.770936 MHz

===== CHANNEL f2 =====

CPDPR2 waltz16  
NUC2  $^1\text{H}$   
PCPD2 80.00 usec  
PL2 -2.00 dB  
PL12 17.50 dB  
SFO2 500.1320003 MHz

F2 - Processing parameters

SF 125.7577883 MHz  
WDW EM  
SSB 0  
LB 1.00 Hz  
GB 0  
PC 1.40

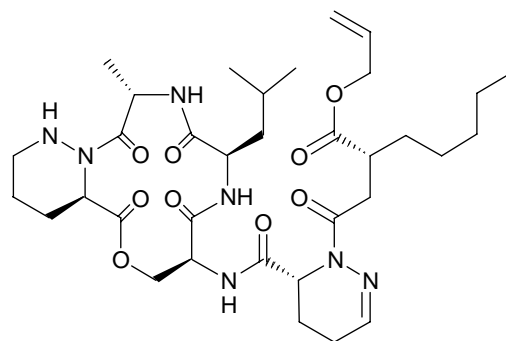

*2R,7S,10R,16S,19R,25R-15c*

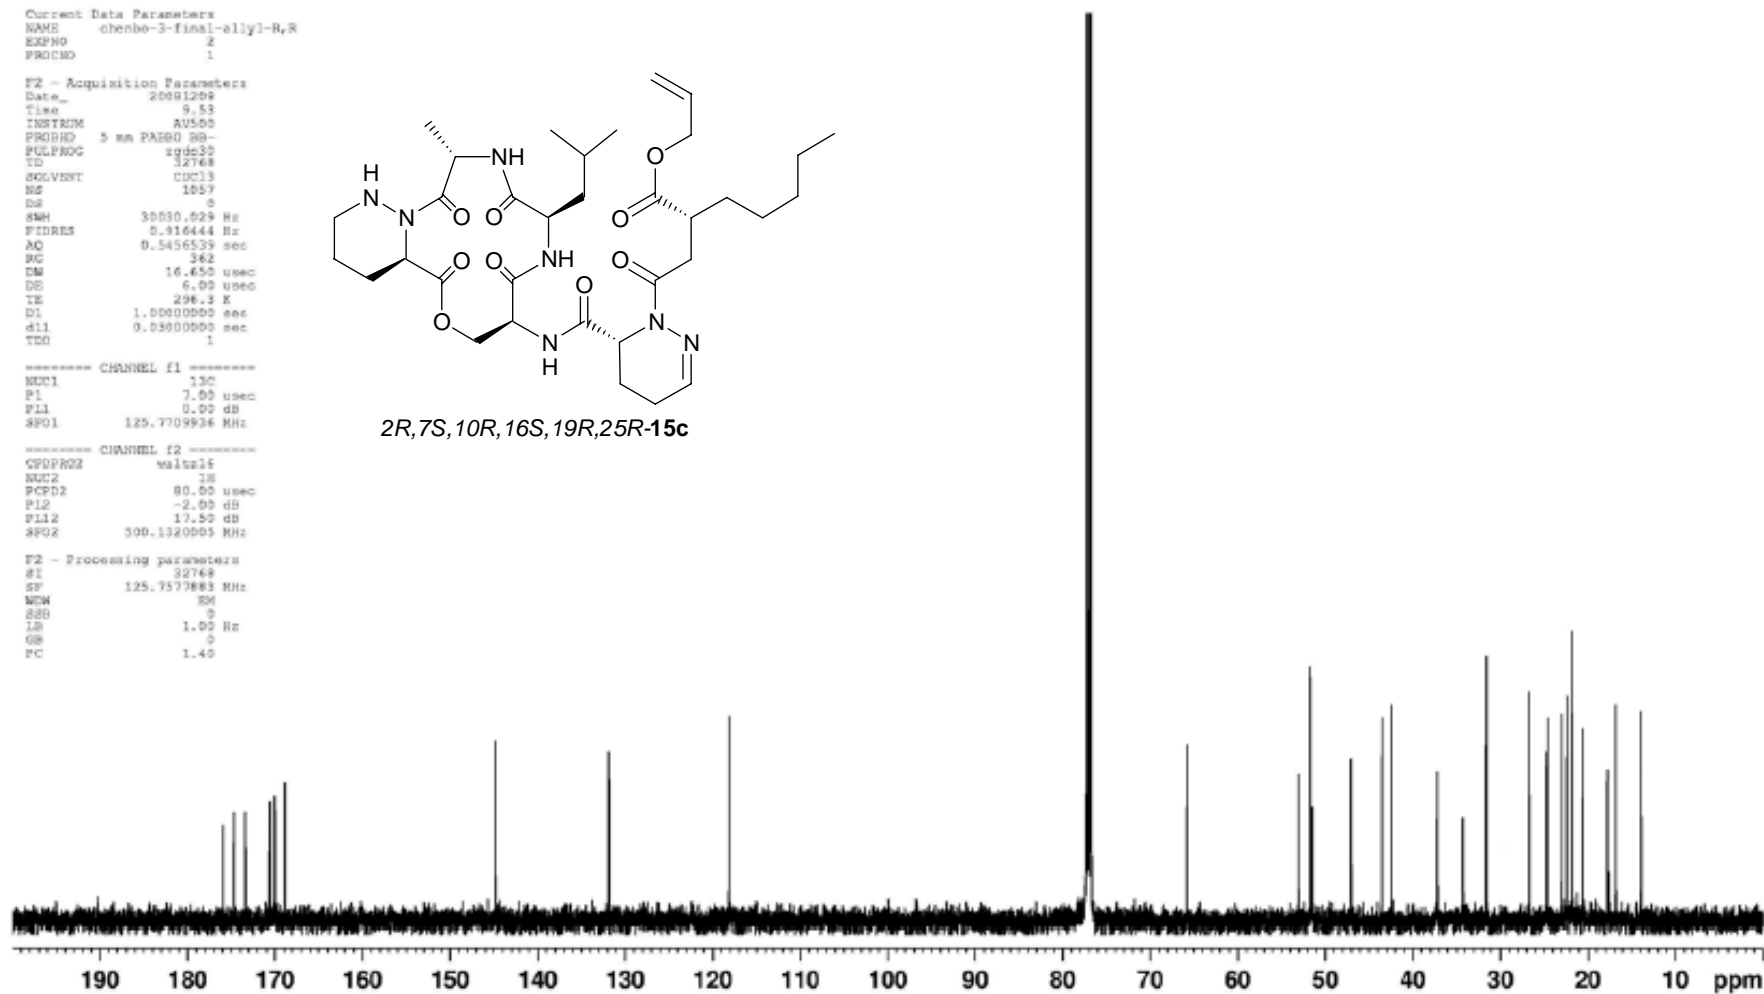

$^1\text{H}$  spectrum of 2*R*,7*S*,10*R*,16*S*,19*S*,25*S*-1

NAME chenbo-3-final-acid-RSS-090408  
EXPNO 1  
PROCNO 1  
Date\_ 20090408  
Time 3.32  
INSTRUM AV500  
PROBHD 5 mm PABBO BB-  
PULPROG zg30  
TD 32768  
SOLVENT CDCl3  
NS 16  
DS 0  
SWH 8012.820 Hz  
FIDRES 0.244532 Hz  
AQ 2.0448356 sec  
RG 114  
DW 62.400 usec  
DE 5.00 usec  
TE 297.3 K  
D1 1.0000000 sec  
TD0 1

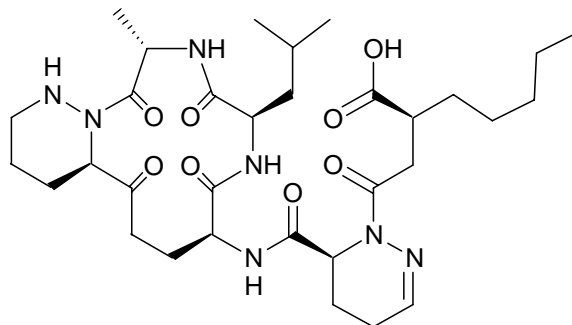

2*R*,7*S*,10*R*,16*S*,19*S*,25*S*-1

===== CHANNEL f1 =====  
NUC1 1H  
P1 8.70 usec  
PL1 -2.00 dB  
SFO1 500.1335009 MHz  
SI 32768  
SF 500.1300092 MHz  
WDW EM  
SSB 0  
LB 0.30 Hz  
GB 0  
PC 1.00

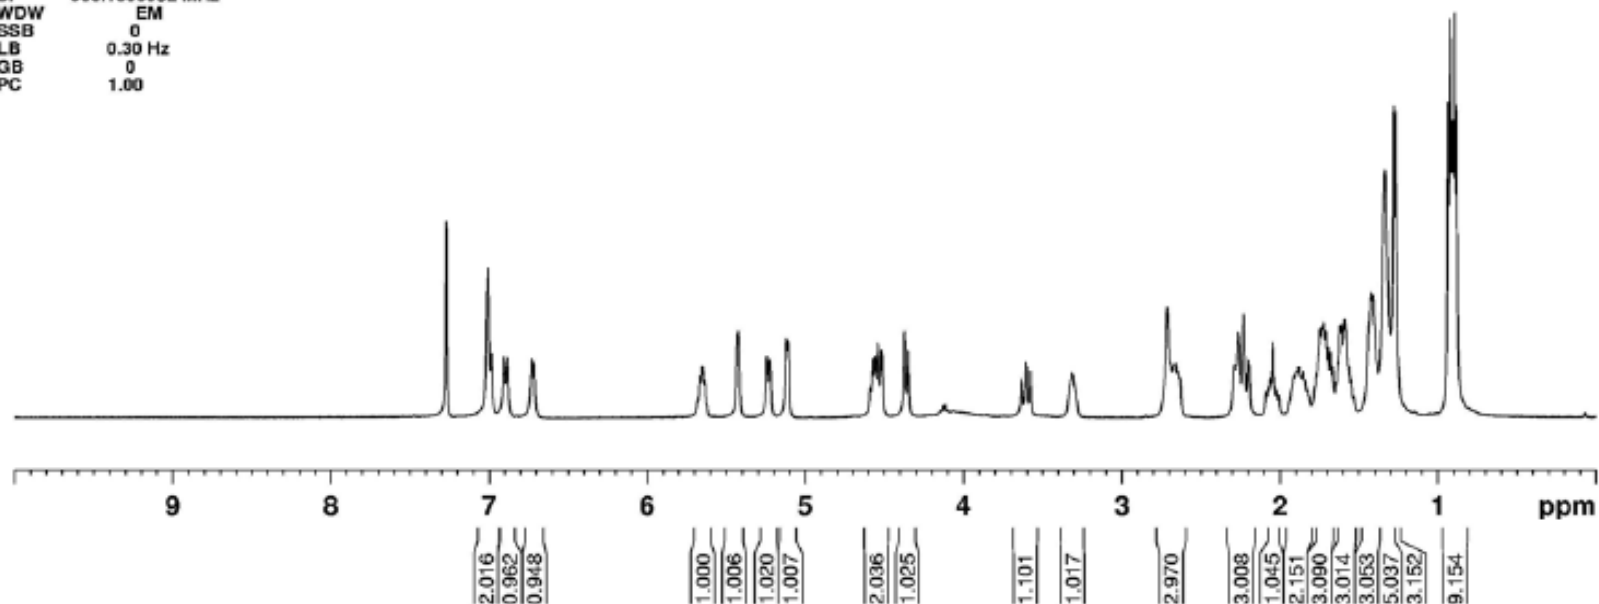

$^1\text{H}$  spectrum of 2*R*,7*S*,10*R*,16*S*,19*S*,25*S*-1

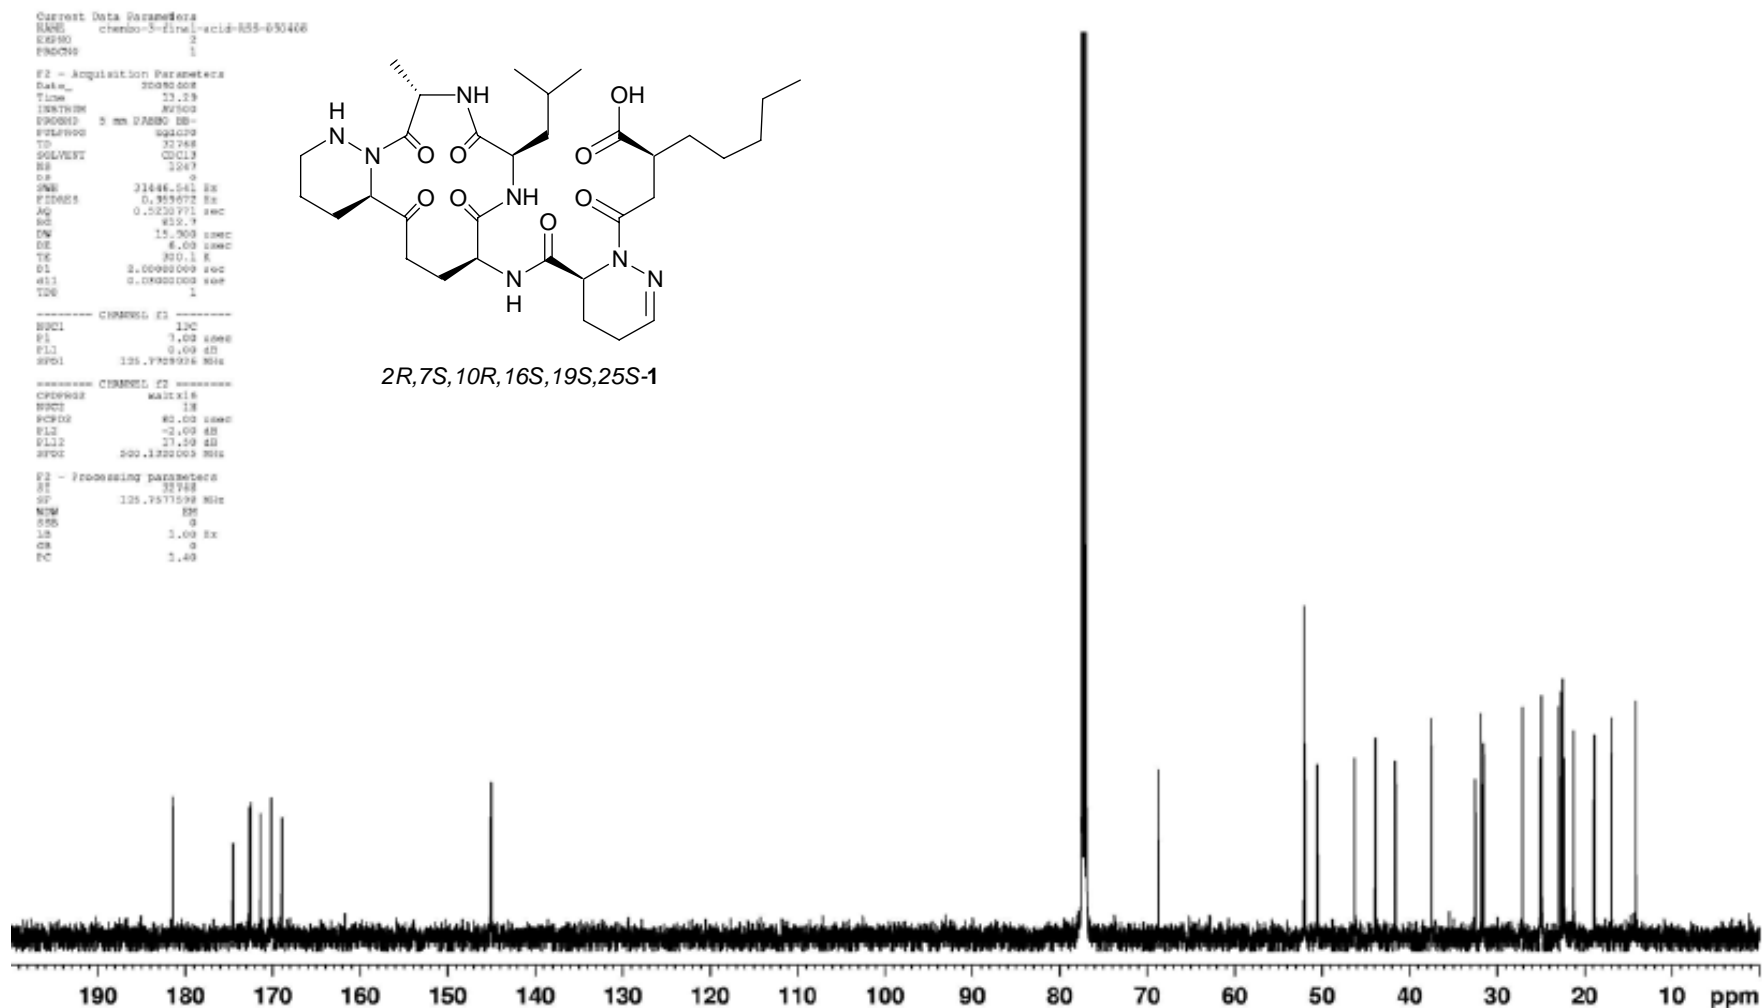

$^1\text{H}$  spectrum of *2R,7S,10R,16S,19S,25R-1a*

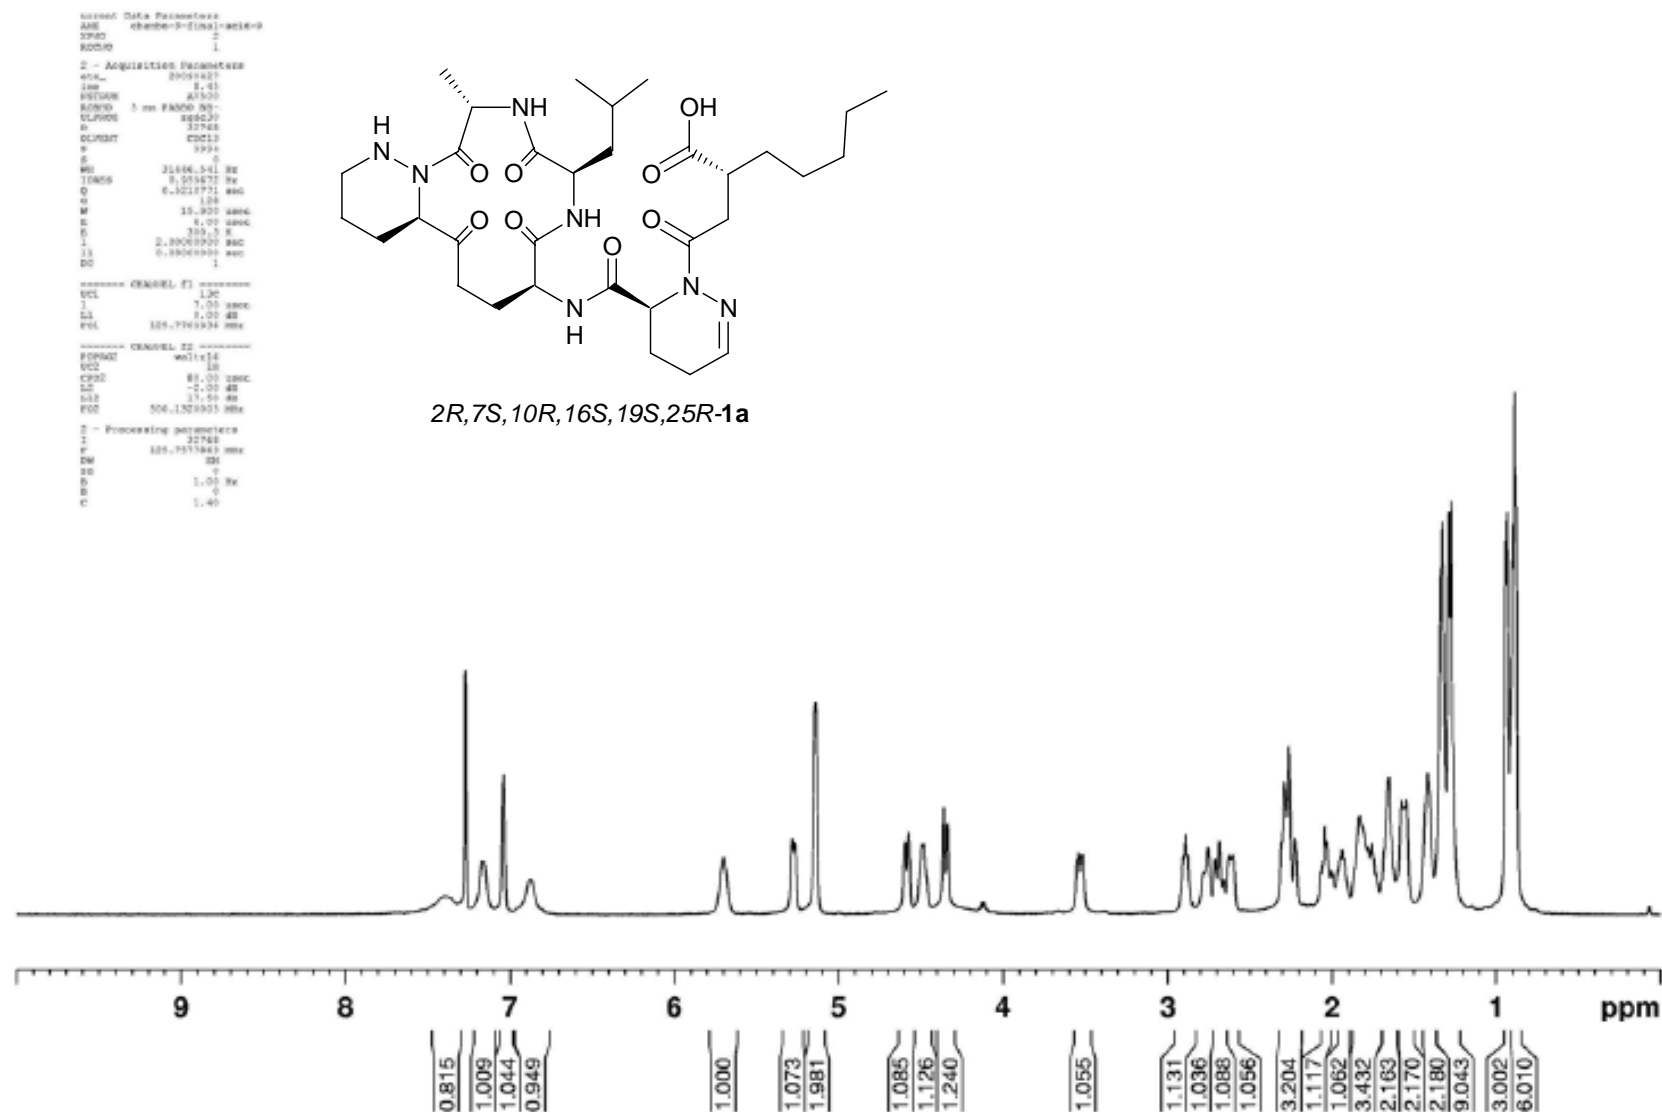

<sup>13</sup>C spectrum of 2*R*,7*S*,10*R*,16*S*,19*S*,25*R*-**1a**

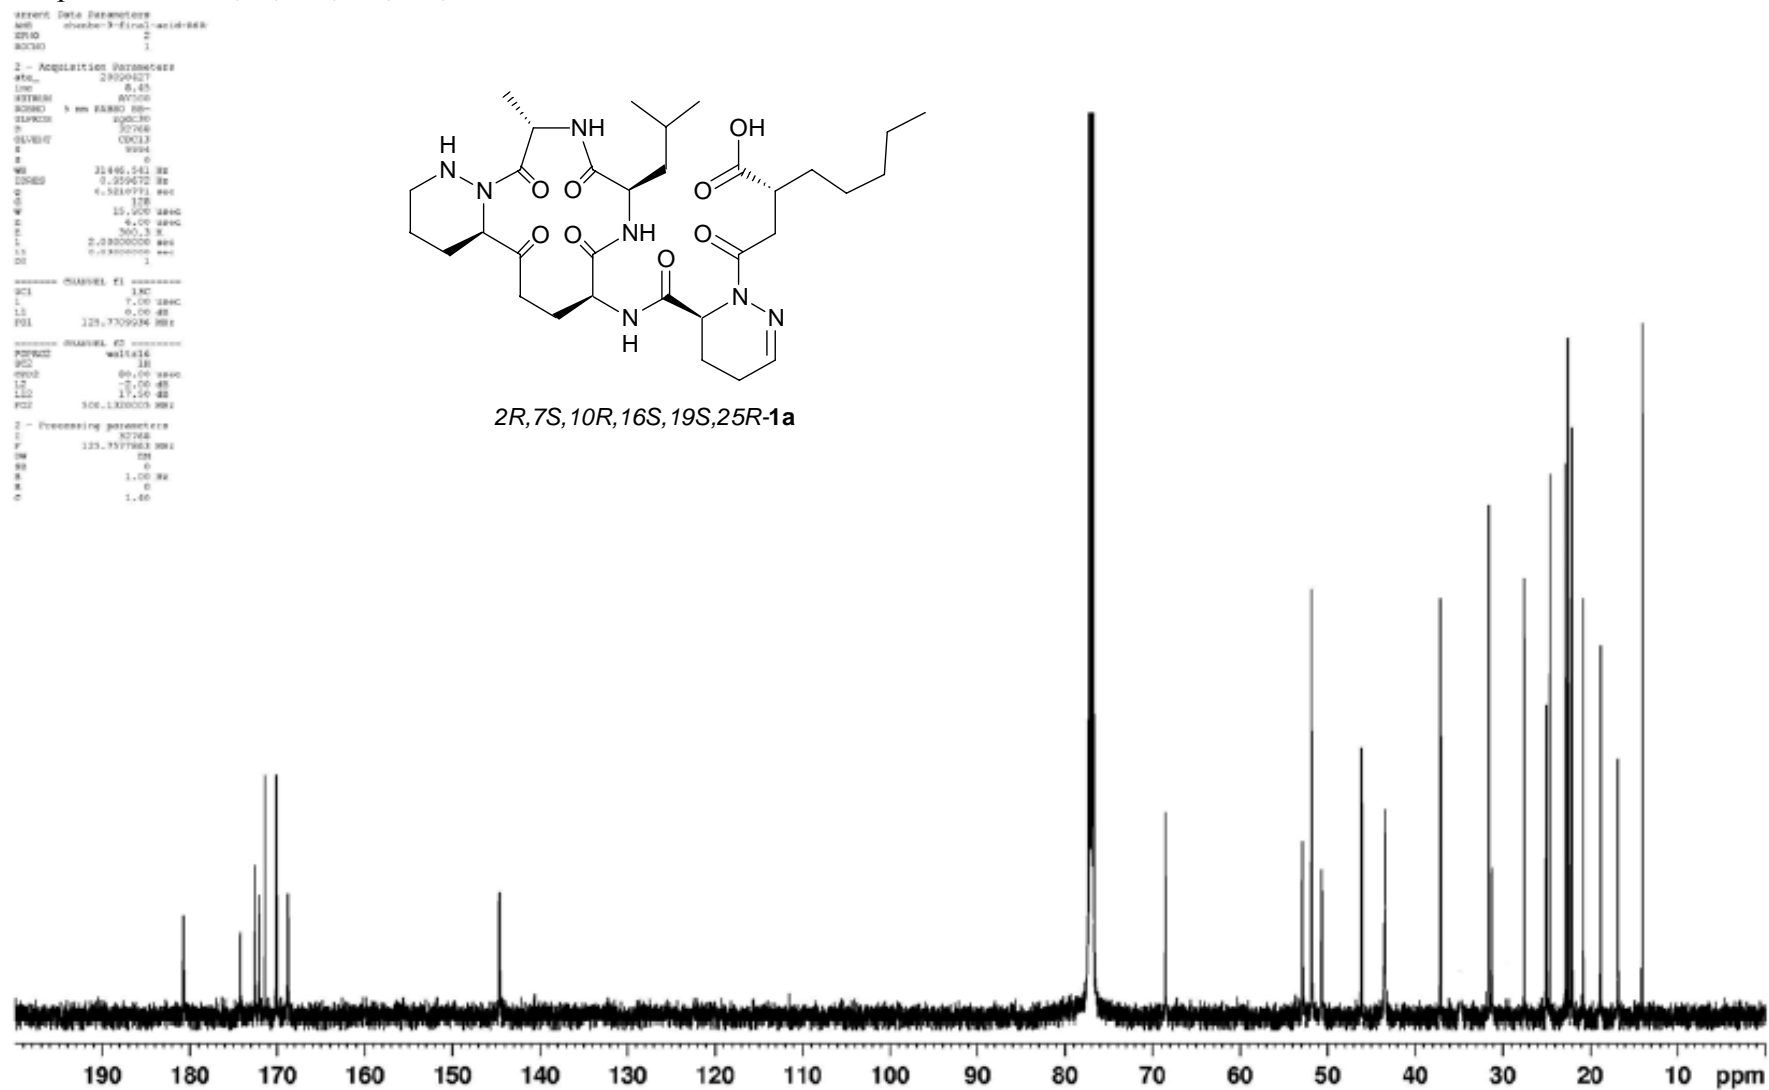

$^1\text{H}$  spectrum of 2*R*,7*S*,10*R*,16*S*,19*R*,25*S*-**1b**

NAME chenbo-3-final-acid-RRS-HPLC-080  
EXPNO 1  
PROCNO 1  
Date\_ 20090413  
Time 8.45  
INSTRUM AV500  
PROBHD 5 mm PABBO BB-  
PULPROG zg30  
TD 32768  
SOLVENT CDCl3  
NS 16  
DS 0  
SWH 8012.820 Hz  
FIDRES 0.244532 Hz  
AQ 2.0448356 sec  
RG 256  
DW 62.400 usec  
DE 6.00 usec  
TE 298.8 K  
D1 1.0000000 sec  
TD0 1

----- CHANNEL f1 -----  
NUC1  $^1\text{H}$   
P1 8.70 usec  
PL1 -2.00 dB  
SFO1 500.135009 MHz  
SI 32768  
SF 500.130092 MHz  
WDW EM  
SSB 0  
LB 0.30 Hz  
GB 0  
PC 1.00

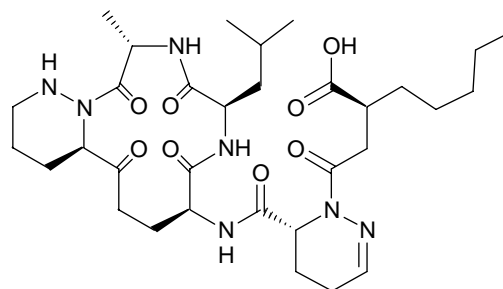

2*R*,7*S*,10*R*,16*S*,19*R*,25*S*-**1b**

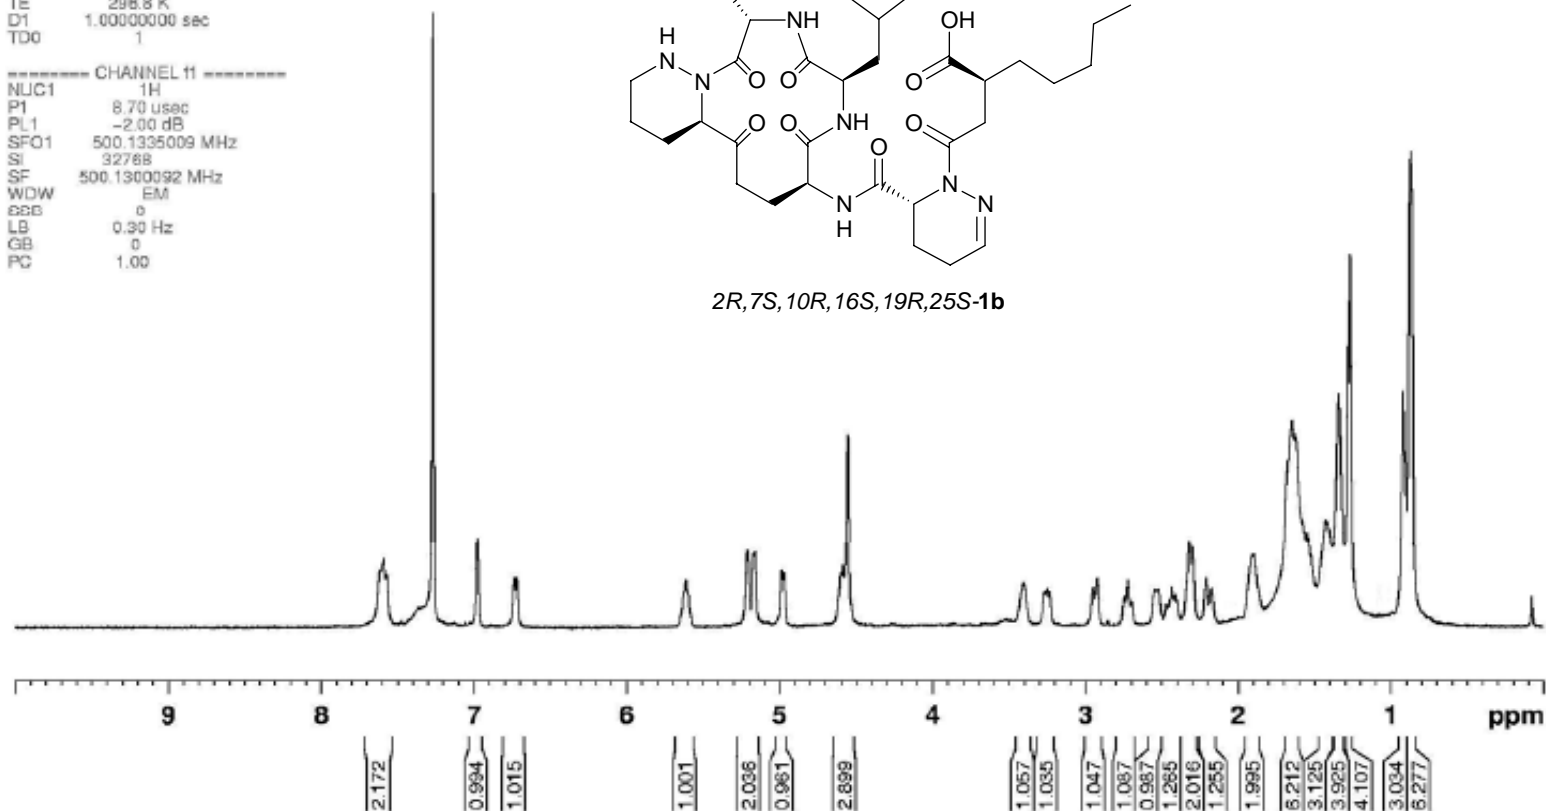

$^{13}\text{C}$  spectrum of 2*R*,7*S*,10*R*,16*S*,19*R*,25*S*-**1b**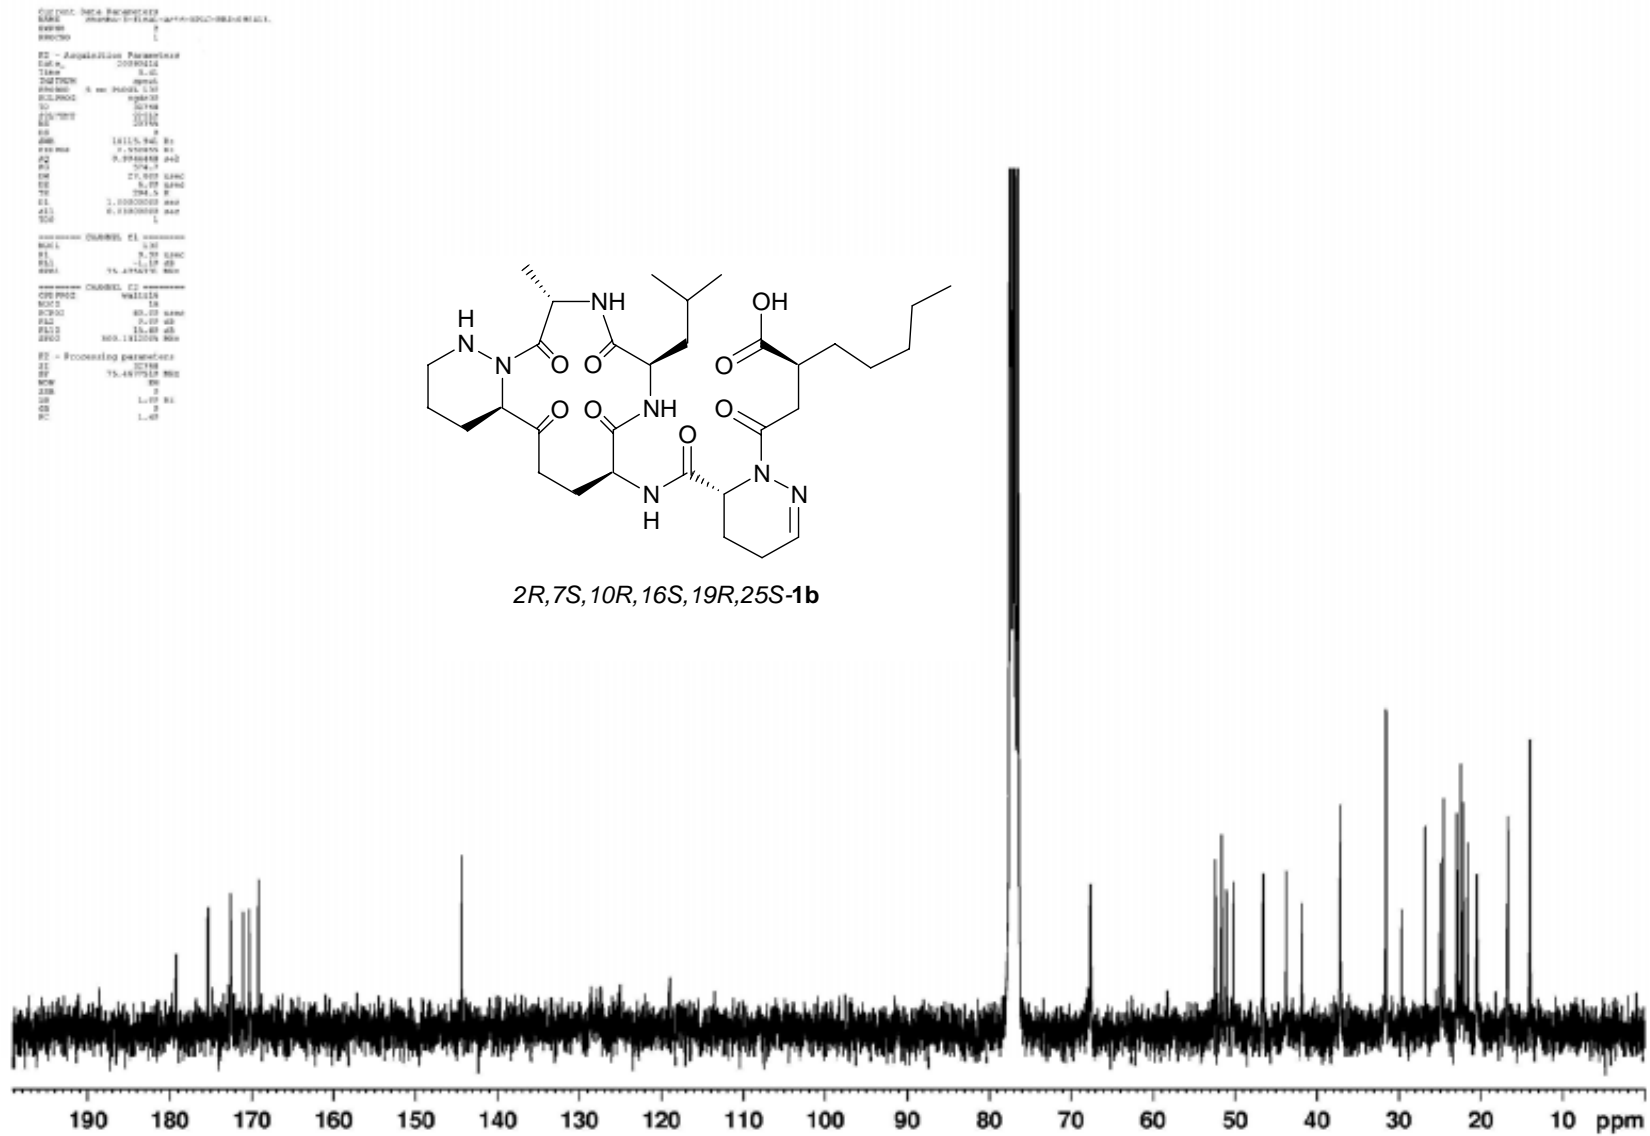

$^1\text{H}$  spectrum of *2R,7S,10R,16S,19R,25R-1c*

NAME chenbo-3-final-acid-RRR-HPLC-090410  
EXPNO 1  
PROCNO 1  
Date\_ 20090410  
Time 11.40  
INSTRUM AV500  
PROBHD 5 mm PABBO BB-  
PULPROG zg30  
TD 32768  
SOLVENT CDCl3  
NS 16  
DS 0  
SWH 8012.820 Hz  
FIDRES 0.244532 Hz  
AQ 2.0448356 sec  
RG 161.3  
DW 62.400 usec  
DE 6.00 usec  
TE 295.4 K  
D1 1.0000000 sec  
TD0 1

===== CHANNEL f1 =====  
NUC1  $^1\text{H}$   
P1 8.70 usec  
PL1 -2.00 dB  
SFO1 500.1335009 MHz  
SI 32768  
SF 500.1300092 MHz  
WDW EM  
SSB 0  
LB 0.30 Hz  
GB 0  
PC 1.00

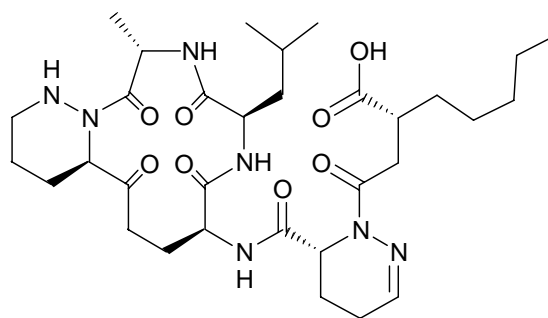

*2R,7S,10R,16S,19R,25R-1c*

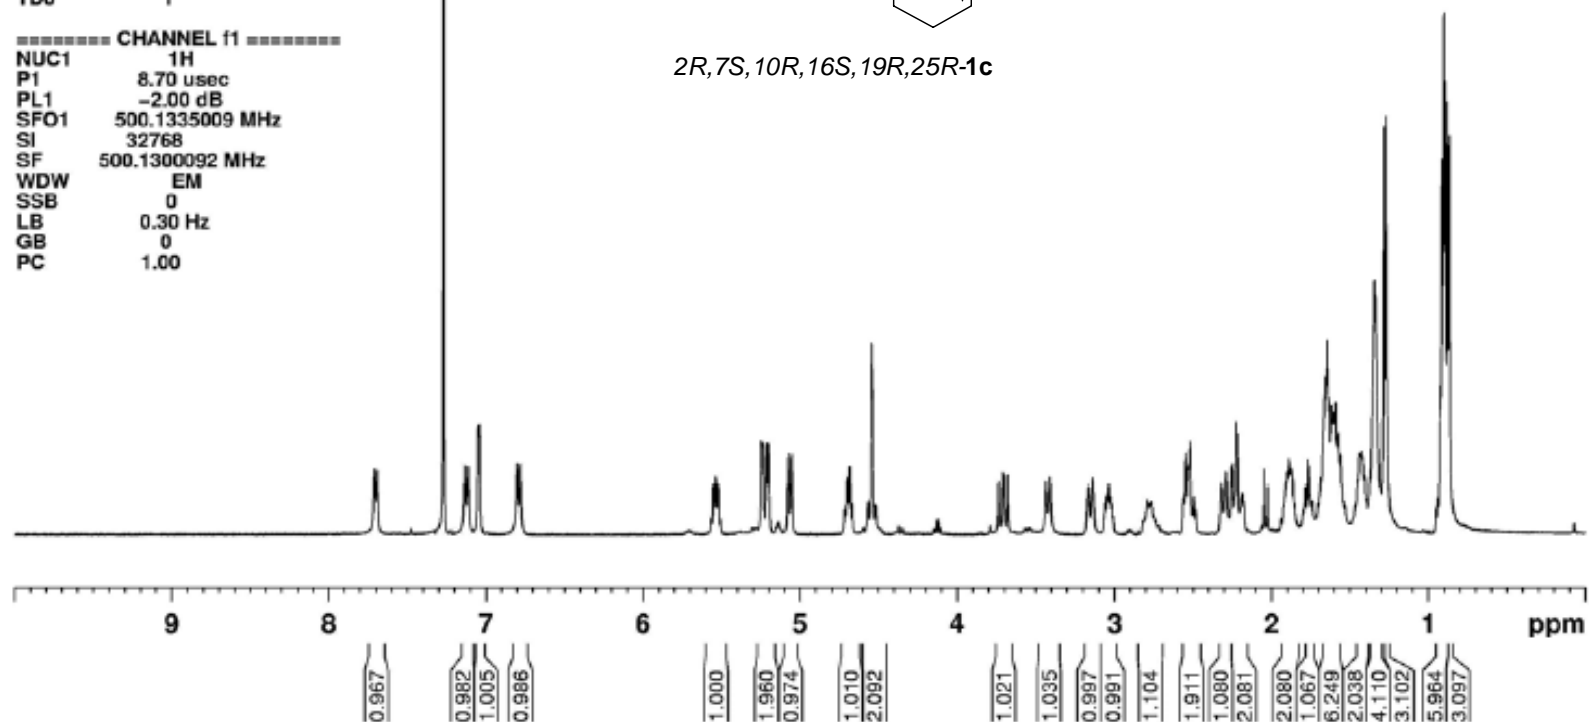

<sup>13</sup>C spectrum of 2*R*,7*S*,10*R*,16*S*,19*R*,25*R*-**1c**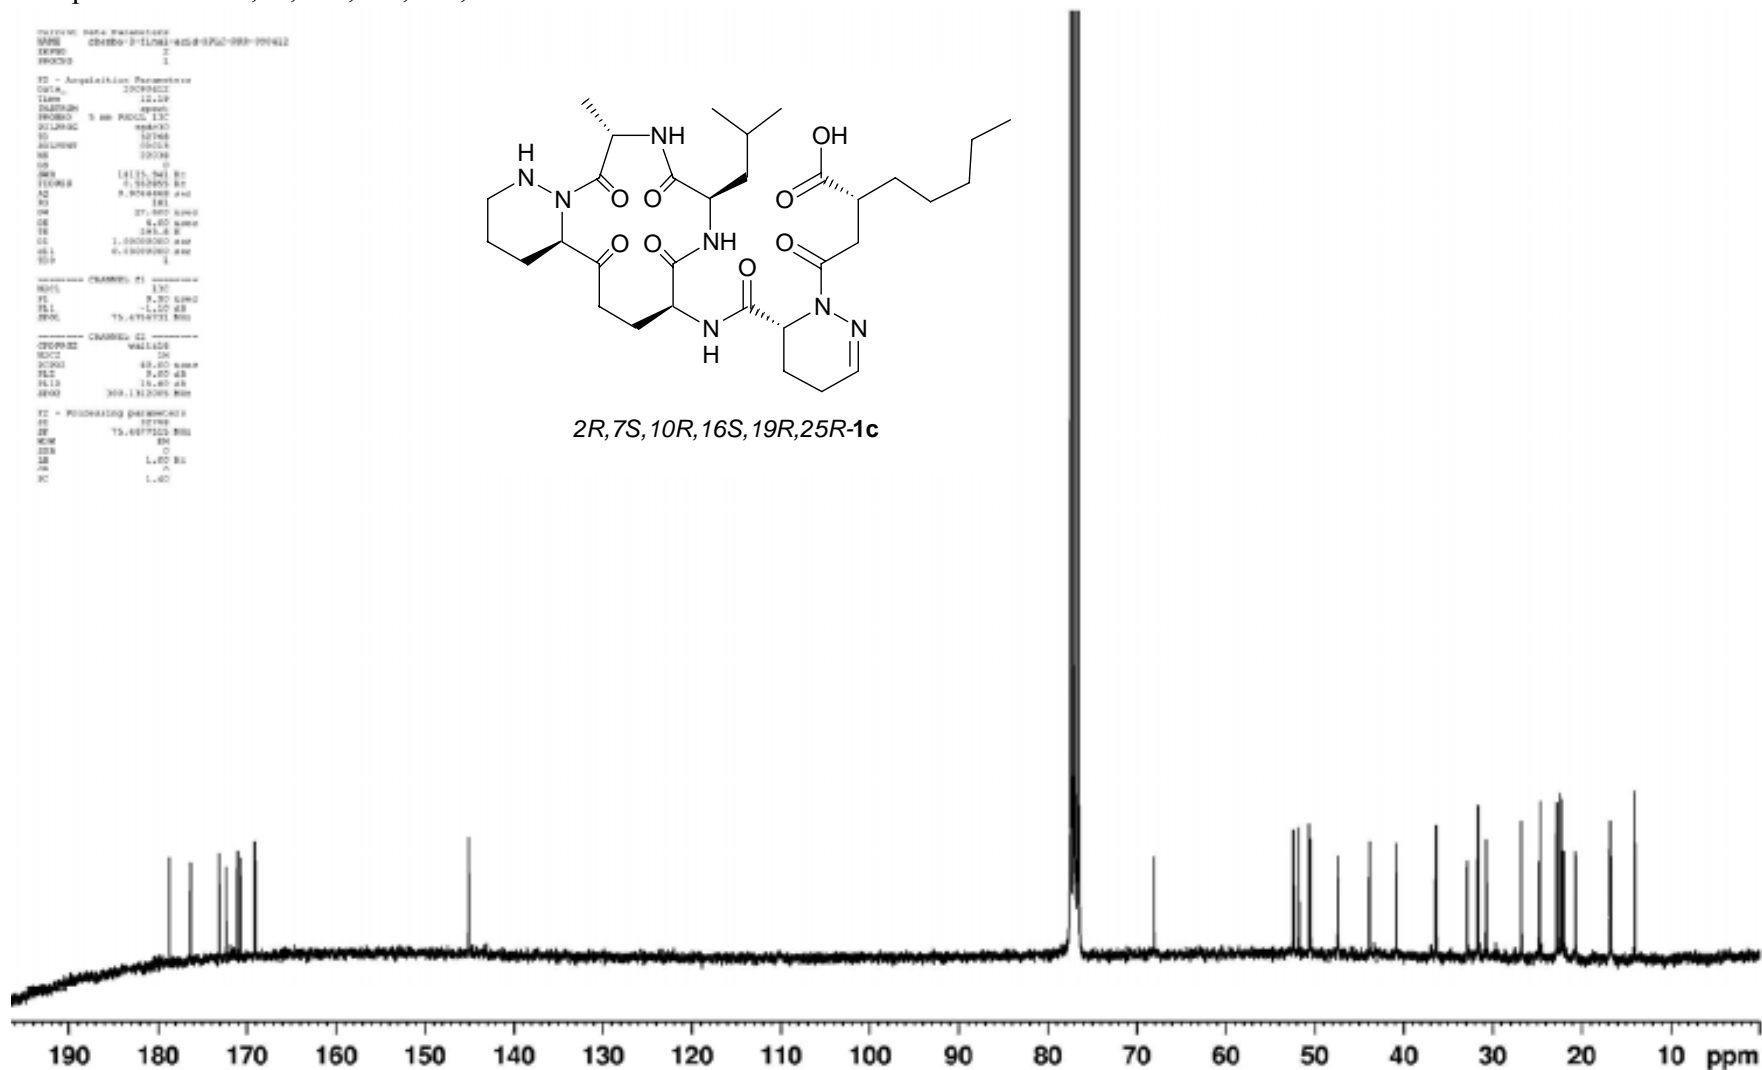

## **Comparison of $^1\text{H}$ NMR of natural product and synthetic samples**

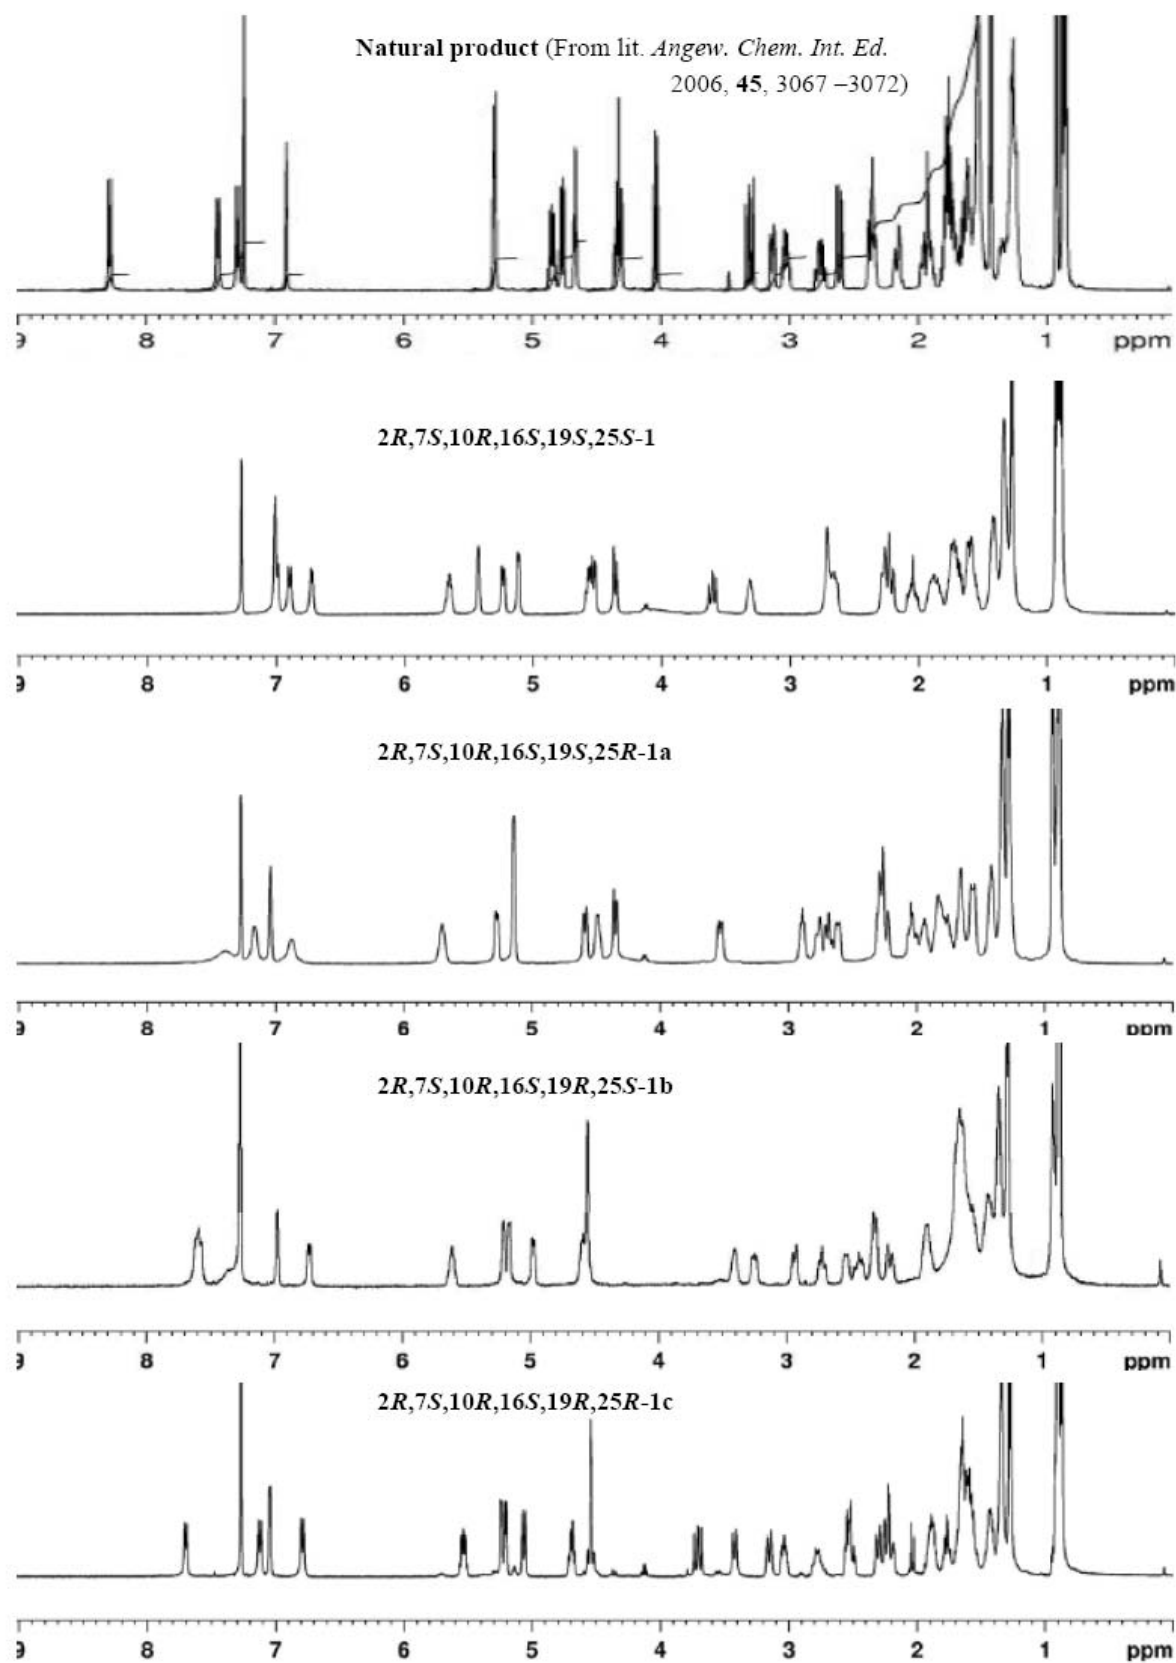

## Comparison of $^{13}\text{C}$ NMR of natural product and synthetic samples

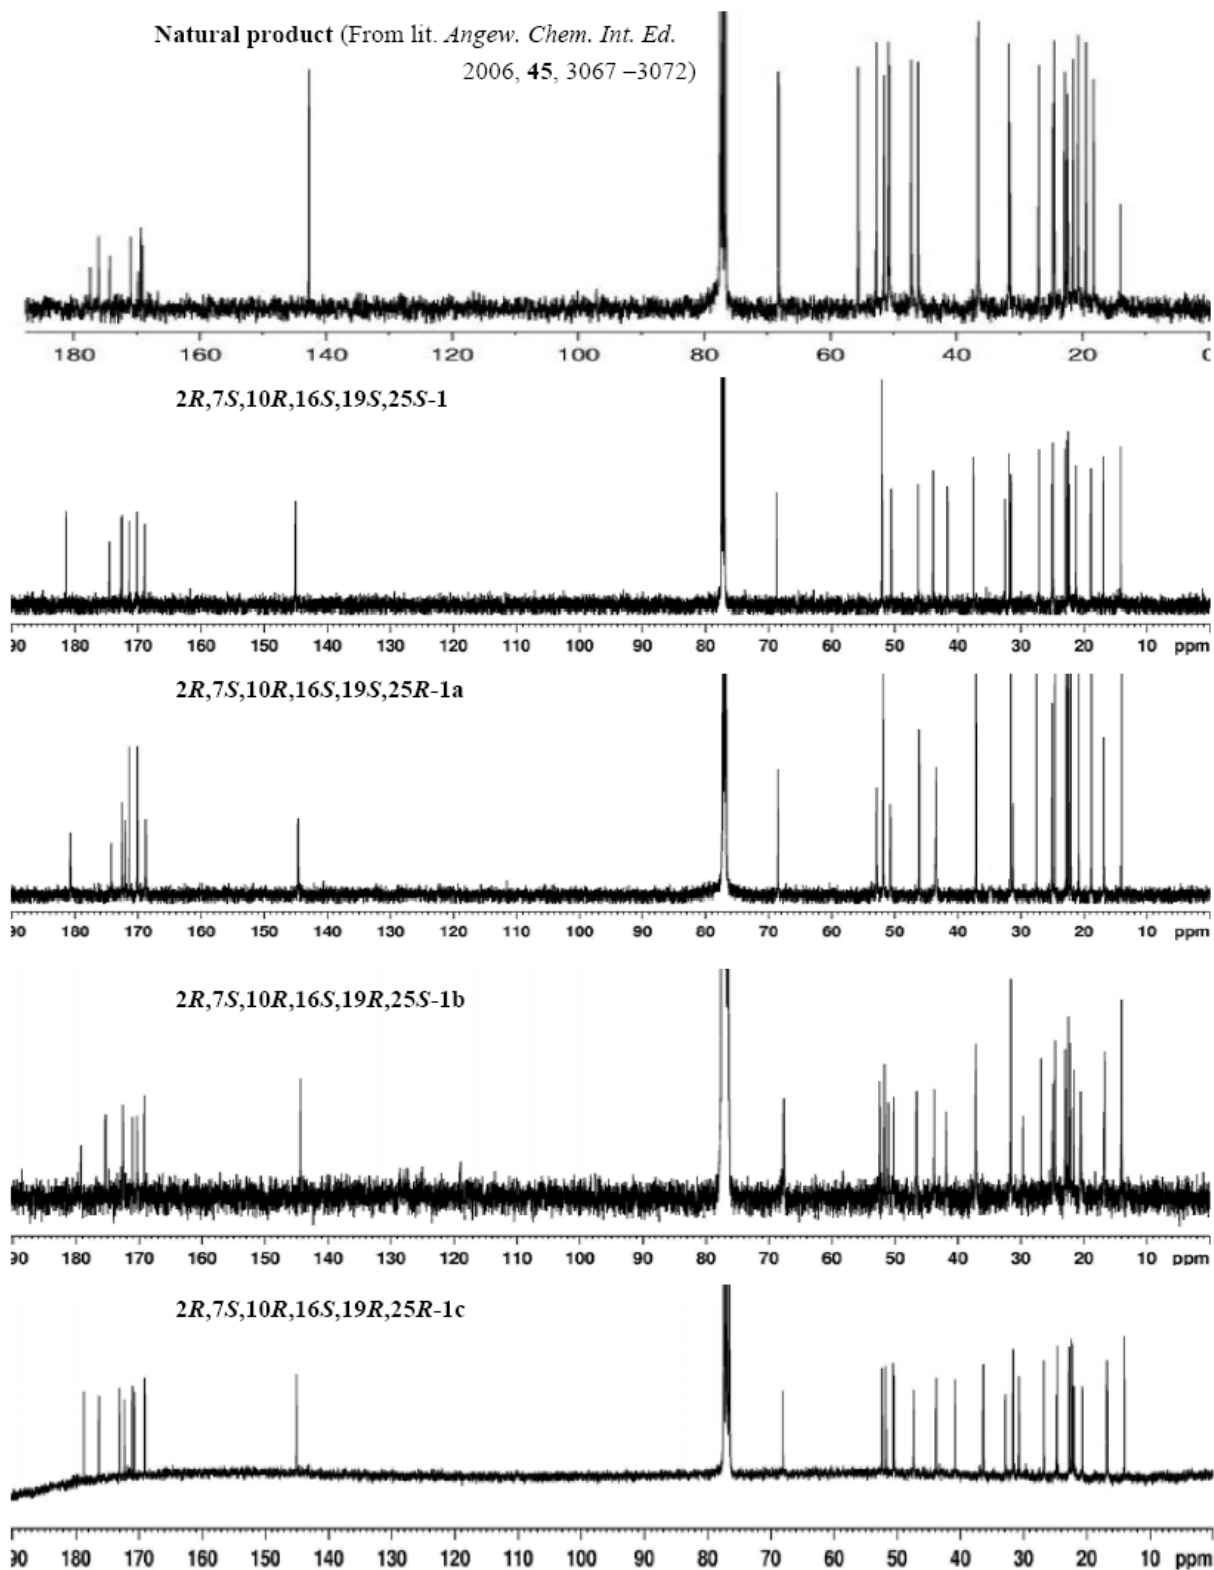

Supplement: b922544g.pdf [file b922544g.pdf]
